# Supplementary material for: Human Induced Pluripotent Stem Cell-Derived Mesenchymal Stem Cells Acquire Rejuvenation and Reduced Heterogeneity
Source: Front Cell Dev Biol. 2021 Sep 16;9:717772. doi: 10.3389/fcell.2021.717772 (PMC8481886; doi:10.3389/fcell.2021.717772)
Supplement: Supplementary Table 2 — Subsets and GO analyses of relevant subsets of the venn diagram of amniotic-fluid-derived MSCs (AF-MSCs), urine-derived renal progenitor cells (UdRPCs) and hepatic stellate cells (HSCs) and the common MSC signature determined before (Figure 4). (A) subsets of genes, (B) Significant GO terms in AF-MSCs (301 genes), (C) Significant GO terms in UdRPCs (476 genes), (D) Significant GO terms in HSCs (2280 genes). [file Table_2.xlsx]

## Sheet: A_subsets
AF_MSC:HSC	common_MSC	AF_MSC:UdRPC	common_MSC:HSC	AF_MSC:UdRPC:HSC	common_MSC:UdRPC	common_MSC:AF_MSC	common_MSC:UdRPC:HSC	common_MSC:AF_MSC:HSC	common_MSC:AF_MSC:UdRPC	common_MSC:AF_MSC:UdRPC:HSC	HSC	UdRPC	AF_MSC	UdRPC:HSC_x000D_
PODXL	A2LD1	HIST1H3A	ACOT2	ZNF600	AMY1A	AIF1	A4GALT	AADAT	AARS	AAAS	WASH9P	ZNF835	TDRKH	PCDHGB5_x000D_
LUM	AADACL1	ARRDC5	ACY1	PLEKHG2	C19orf40	ANXA2P1	ABHD6	ACOX2	AATK	AACS	AP006222.1	PARD6A	EPPK1	ZNF680_x000D_
AQP1	ACCN2	CGB	ALDH1L2	IMPACT	CCDC41	ANXA2P3	ABI3BP	ADAMTS6	ACN9	AAGAB	AL732372.2	NXNL2	EBI3	C3_x000D_
CRMP1	ACER2	FAM86C1	ALG1	MAGI3	CRIP1	ENTPD3	ANG	APOLD1	ACPL2	AAK1	MTCO1P12	SST	FGFR3	SLC40A1_x000D_
MTUS1	ACTRT1	CACNG8	ANGPT1	SPATC1L	EID2B	H2AFJ	ASF1B	ATL1	ADAMTSL1	AAMP	MTATP6P1	ACTG1P4	C10orf54	PER1_x000D_
NDUFA4L2	ADRA2A	KRTAP6-2	ANGPTL2	ZNF184	H2AFY2	HCN4	ASPM	BCL9	ADORA1	AARS2	LINC01128	TSPAN7	AZGP1	PRUNE2_x000D_
EFHD1	AFG3L1	SSX7	ANKDD1A	RRNAD1	HIST2H2AC	HIST2H2BE	ATAD2	BVES	ADPRHL2	AARSD1	LINC02593	RASD1	PDZD2	SOCS3_x000D_
PTX3	AGAP8	PCDHA13	ANKRD36B	KLF7	HLA-H	KIAA1199	BARD1	C6orf47	ADRBK1	AASDH	INTS11	CLDN7	ALOX5AP	CDCA3_x000D_
HES6	AGXT2L2	PCDHA4	ANXA2P2	PLCB3	HYDIN	MAMLD1	C4orf33	CACNB3	ADSS	AASDHPPT	CPTP	CPVL	CTSS	CGNL1_x000D_
CLCN5	AK3L1	TUBB7P	APAF1	CBWD1	IL10	MAP6D1	C8orf37	CCBE1	AES	AASS	MRPL20-AS1	LOC81691	IL1B	GMPR_x000D_
C3orf18	AKR1D1	KRTAP6-1	ARAP3	SERPING1	IRX3	MARCH3	CCDC125	CCND2	AGPAT6	AATF	MRPL20-DT	S100P	MISP	TMEM176A_x000D_
SV2A	AKR7A3	KRTAP10-12	ARL17B	BLOC1S5-TXNDC5	KIAA0101	MARCH4	CCNA2	CD248	AHSA2	ABCA1	TMEM240	CHRDL1	FAM174B	PLEKHF2_x000D_
OLFML2A	ALPP	KRTAP10-1	ARRB1	RPL10	L2HGDH	MOCOS	CCNF	CDCA8	AIF1L	ABCB10	FNDC10	FKBP1A-SDCBP2	DIRAS1	SPAG5_x000D_
OLFML2B	ALS2CR14	KRTAP10-3	ATN1	ARHGDIB	LOC399491	POPDC3	CDC20	CDH11	AIRE	ABCB6	AL691432.2	PIK3AP1	SELPLG	PPARG_x000D_
SNAI1	ALS2CR4	OR2A14	AXIN2	GABARAP	LOC493754	RASAL3	CENPA	CDKN2B	AKAP2	ABCB7	MMP23B	LOC101060683	FAM107A	GDPD5_x000D_
PLXNA2	ALX1	KRTAP10-9	BCYRN1	ATP6V1G2-DDX39B	LPHN2	RFXAP	CENPF	CHN1	ANKRD37	ABCB9	SLC35E2B	ALDH5A1	TNF	MKI67_x000D_
PDE5A	AMY1B	UNCX	BEX1	HLA-DPA1	MAGEE1	RHBDL2	CENPH	CHSY3	APBB1IP	ABCC1	AL031282.2	MAOB	MEOX1	GNG2_x000D_
PAMR1	AMY1C	DUX2	BHLHB9	PPIB	MC1R	SERPINB7	CEP55	CLIC3	APITD1	ABCC10	SLC35E2A	HOMER2	BAI2	RAMP1_x000D_
USP20	ANKRD22	PNMAL1	C14orf132	TMX2	MNS1		CFI	COL12A1	APOA1BP	ABCC4	FAAP20	DHRS13	APC2	NEK2_x000D_
SLC7A7	ANKRD30B	LCE1D	C1orf112	CRYAB	OIP5		CPS1	COL3A1	ASNA1	ABCC5	PRXL2B	MYL3	CDK5R1	NUF2_x000D_
PITX1	ANKRD33	LCE1F	CA5B	RTCB	PCOLCE2		CYB5R2	COL6A3	ASPHD2	ABCD3	SMIM1	MPZL2	ZG16	ITGB8_x000D_
TRIM62	ANKRD34A	LCE1A	CADPS2	WDR83OS	PRKCH		DEPDC1	CPT1C	ATP5A1	ABCE1	PIK3CD-AS2	FAAH	RARB	IDNK_x000D_
HTRA3	ANKRD35	BAI1	CALM2	KRT7	RGMA		DLGAP5	CXCL12	ATP5B	ABCF1	CENPS	EVA1C	KCNMB4	IGFBP2_x000D_
SH3RF3	ANKRD57	KRTAP10-10	CALM3	CD164	SNORA33		EFCAB7	DAAM2	ATP5C1	ABCF2	RNU5E-1	NGEF	SAG	TLE2_x000D_
PLA2G4C	AOF2	UTS2R	CBWD3	AKR1C3	SPRR1A		EFS	DACT1	ATP5D	ABHD10	DDI2	MCF2L	PSG5	TMEM37_x000D_
RGS5	ARD1A	KRT33A	CCDC136	MANF	STEAP1		EMP1	DCBLD1	ATP5E	ABHD12	RSC1A1	SOX2	ARHGEF15	SCN1B_x000D_
DCLK2	ARHGAP30	CEMP1	CCDC18	WDR45B	XRCC2		F2R	DDR2	ATP5F1	ABHD14A	CPLANE2	ENPEP	MUM1L1	GSTM4_x000D_
MAP6	ARMET	MLXIPL	CCDC74B	TMEM248	XRCC3		FAHD2B	DEPDC7	ATP5G1	ABHD14B	CROCCP3	KBTBD11	CSPG5	RBM48_x000D_
NPR3	ARPM1	LHB	CCT6P1	IFI27			FAM24B	DKK1	ATP5G2	ABHD15	RNU1-1	ARHGAP39	CALY	RNF166_x000D_
NRK	ARS2	KRTAP10-8	CLEC2D	EFNB1			FOXM1	DNAJC12	ATP5G3	ABHD2	EIF1AXP1	CDT1	HOXD1	CADM3_x000D_
DMD	ASAH2C	NKX1-2	COL8A2	CD24			GABPB2	DOCK10	ATP5H	ABHD4	RNU1-4	CRYM	SH2D3A	PHYKPL_x000D_
NALCN	ASAM	VSTM5	CPXM1	PLEC			GALM	DOHH	ATP5I	ABHD5	BX284668.4	ADORA2A	CECR1	PTN_x000D_
MEF2C	ATP5EP2	SPATA31D3	CSPG4	KCTD12			GINS2	DTNA	ATP5J	ABHD8	RNU1-2	PRPH	PLEKHG1	CACNB1_x000D_
ITGBL1	ATPBD1B	SP9	CXorf56	ABHD17A			GK	ENPP1	ATP5J2	ABI1	SLC66A1	PLLP	TNNT3	ZNF711_x000D_
GATA6	AVPR2	GH1	DCAF15	MTFR1L			GPX3	FAM167A	ATP5L	ABI2	MICOS10	MGAT3	ABCC8	SPON1_x000D_
ANKRD13B	AXUD1	HBB	DHRS4L2	BRK1			HHLA3	FAP	ATP5O	ABL1	NBPF2P	GUCY1A3	TSPAN11	AS3MT_x000D_
ARHGAP28	AYP1p1	SPDEF	DNAJC25-GNG10	TMEM258			HMMR	FAR2	ATP5S	ABL2	LINC00339	TMEM27	LGALS7	MERTK_x000D_
PPIP5K1	B3GNT6	KISS1	DNLZ	SLC25A29			HSPBAP1	FBLN2	ATP5SL	ABR	ZNF436-AS1	TMC4	RHCG	CCDC113_x000D_
NHSL1	BAT1	FLJ23867	DTWD2	BABAM1			KIF20A	FBN2	ATPIF1	ABT1	ELOA	REPS2	ZCCHC18	HAAO_x000D_
PDE4D	BAT2	RTFDC1	DTX3	FAM162A			KIF20B	FBXL7	AUTS2	ABTB1	SRSF10	COX6A2	FAM212A	SNCAIP_x000D_
SYT1	BAT2D1	LOC101060281	DUSP2	DESI2			KIF23	FBXO10	AZI1	ACAA1	STPG1	FGR	HLA-DQA1	EEPD1_x000D_
PDPN	BAT2L	MINOS1-NBL1	DZIP1L	PIM3			KIF2C	FEZ1	B3GALTL	ACAA2	RSRP1	CYP2J2	ARMC4	B3GALT4_x000D_
TMEM204	BAT3	LUZP6	EGR2	RAP1A			KIF7	FLI1	B3GNT1	ACACA	MACO1	SLC17A7	TMPRSS2	KLF15_x000D_
FLT1	BAT5	PRH1-PRR4	EIF3CL	NDUFS6			KLHL22	FLRT2	BIRC3	ACAD10	SELENON	PKN3	CLSTN2	ANKRD6_x000D_
ZBTB39	BEXL1	PRRC2B	ELOVL4	BAG1			LRRCC1	GAB2	BOLA2	ACAD11	TENT5B	GAL3ST1	SP6	CDK1_x000D_
FAT4	BHLHB2	P2RX5-TAX1BP3	EPM2A	MTOR			LRTOMT	GALNT5	BRE	ACAD8	WDTC1	IFI44L	KCNJ8	ZNF230_x000D_
P4HA3	BMS1P5	ST14	ERCC5	BAHD1			MCM5	GAS1	C10orf118	ACAD9	AL031729.1	GNG7	JPH1	SPAG4_x000D_
TCEAL7	BP75	LOC100128775	ERN1	RBFOX2			MTCP1	GFOD1	C10orf137	ACADM	SCARNA1	LYL1	RNFT2	CBX8_x000D_
RORA	BRD7P2	MAL2	EVI2A	ECE1			NBPF3	GFPT2	C10orf2	ACADVL	ATP5IF1	ABCA3	UPK1B	CCDC134_x000D_
DIRAS3	BRI3P1	SLPI	FAM156B	SLIRP			NBPF8	GNB4	C10orf32	ACAP2	MED18	RAB26	BANK1	ATP6V1E2_x000D_
TMA16	BRP44	LOC100505828	FAM43A	POLR2E			NCAPG	GPC2	C10orf76	ACAT1	SNHG3	ALPK3	KAL1	PYROXD2_x000D_
PTGER4	BRP44L	VWA9	FAM86B1	SRSF6			NDC80	GPNMB	C11orf48	ACAT2	SNORA73A	VSNL1	DAGLA	HOXA4_x000D_
APBA1	BRWD2	PAPD7	FAM89A	UQCR11			NFIA	GPR1	C11orf57	ACBD3	SNORA73B	HABP2	TMEM132C	SKA3_x000D_
S1PR3	BTBD12	EFNA1	FBLN5	JUP			NR1H3	GREM1	C11orf70	ACBD6	AL360012.1	ENHO	LCP1	FANCI_x000D_
ARSI	BTBD15	LOC101060373	FLJ20021	EFCAB14			NUDT11	HCFC2	C11orf73	ACCS	FABP3	GRB7	IL34	IL27RA_x000D_
FRY	C10orf104	FUT5	FNTB	MPC2			NUSAP1	HLX	C11orf74	ACD	ADGRB2	FAM64A	LAT	FMO4_x000D_
RNF112	C10orf26	PRKCZ	FRRS1	TGFB1			ODF2L	HS3ST3A1	C11orf83	ACIN1	MTMR9LP	MYO5C	ARHGAP9	FAM83D_x000D_
CPED1	C10orf28	GPR56	GABRE	WBP1L			OLFML3	IL11	C12orf10	ACLY	YARS1	RNF157	TMEM81	TLR3_x000D_
F2RL2	C10orf57	C1QA	GAL3ST4	SELENBP1			PBK	INPP4B	C12orf23	ACO1	AZIN2	DOCK2	CNIH3	ACSS3_x000D_
ADAMTS14	C10orf58	PCDHGA1	GEM	LGALS9			PEAR1	ITGA11	C12orf44	ACO2	ZSCAN20	CMKLR1	HSPA1L	BBS5_x000D_
IGF2BP1	C10orf59	F13A1	GMPPB	SLC39A13			PLCXD1	ITGA4	C12orf49	ACOT1	AC114490.1	PNMA2	CCDC87	PTPRH_x000D_
NPPB	C10orf6	C10orf10	GNG10	TUBA4A			PMS2CL	KIAA0408	C12orf5	ACOT7	TMEM35B	OGDHL	KRT14	DBP_x000D_
MMP23A	C10orf61	LOC100130872	GOLGA8B	NELFB			POLE2	KLHL29	C12orf52	ACOT8	CLSPN	SLC3A1	LCN10	LCORL_x000D_
SHROOM2	C10orf72	TNNI1	GPR89B	SIAE			PPP1R14A	L3MBTL3	C14orf142	ACOT9	ADPRS	E2F2	PSG11	C12orf66_x000D_
HOPX	C10orf78	PGC	GPRASP2	SPINT1			PRIM1	LAYN	C14orf159	ACOX1	LINC01137	SKAP1	DNAI1	MYH11_x000D_
WFDC1	C11orf10	CLDN4	GRK5	CUL3			PTCD2	LRP8	C14orf166	ACOX3	RSPO1	ATCAY	HDAC9	LRRC8B_x000D_
EID3	C11orf17	DKFZp686K1684	GSTM2	SDR39U1			RABGEF1	LRRC17	C14orf169	ACP1	UTP11	NAP1L2	AQP11	ADAT2_x000D_
HYAL3	C11orf2	LOC101060431	GTF2H2B	ELAVL1			RPL27A	MAP4K2	C14orf2	ACP2	MYCBP	C2orf72	KRT15	ATP2A3_x000D_
MGARP	C11orf46	EPCAM	GTF2IP1	SZRD1			RPL3	MEIS1	C14orf37	ACSF2	AL050341.2	CST6	KCNC1	ENO3_x000D_
TENM3	C11orf51	LOC100996626	GTF2IRD2B	FGFR1			SHCBP1	MEIS2	C14orf79	ACSL1	COL9A2	NRCAM	FOXL2	MORN1_x000D_
FAXC	C11orf59	CXCL5	HAS2	HES1			SKA1	MEX3B	C15orf38	ACSL3	AL031985.3	PPP1R14C	GRIN2D	LSM11_x000D_
SARM1	C11orf60	AP1M2	HIC1	PRRC2C			SKP2	MFAP5	C15orf41	ACSL4	ZFP69	KIAA1644	PTPRR	MARVELD2_x000D_
BRICD5	C11orf61	ATP8B5P	HSPA1B	KDM3A			SLC27A3	MGP	C15orf52	ACSS2	P3H1	C20orf196	CSF2	ZNF718_x000D_
SHC2	C11orf63	PCSK1N	IDUA	CYSTM1			SLC38A5	MN1	C15orf57	ACTA2	SVBP	KIAA1211L	RASGRP1	GAS2L3_x000D_
KALRN	C11orf67	C11orf31	IL7R	PDZD11			SPC24	MSX1	C16orf13	ACTB	RNU5F-1	AMBP	KIAA1549L	C1QTNF3_x000D_
CD274	C11orf75	LOC101060503	KCNG1	ABCF3			TGFBR3	MX1	C16orf45	ACTG1	RNU5D-1	GCNT3	KRT80	C4A_x000D_
TSPAN2	C11orf82	TACSTD2	LAGE3	EMC7			TOP2A	MYO18A	C16orf58	ACTL6A	TESK2	TCP10L	C8orf47	ZNF432_x000D_
NRXN3	C12orf11	ADIRF	LDB2	DTYMK			TROAP	MYO9B	C16orf62	ACTN1	MOB3C	HS6ST2	KRT34	BRCA1_x000D_
MDGA1	C12orf24	IKBKAP	LINS1	ERLEC1			TTK	NACC2	C16orf80	ACTN4	NRDC	DDIT4L	RAB25	GTSE1_x000D_
BTBD9	C12orf26	FOSB	LRIG2	ZNF106			USP35	NAF1	C16orf93	ACTR10	TUT4	CLDN2	PADI4	ZNF662_x000D_
CARD6	C12orf30	FOPNL	LRRK1	MYO1D			WDR92	NAP1L3	C17orf100	ACTR1A	COA7	PPP1R9A	ASIC1	SPATA6_x000D_
CHAC2	C12orf31	LOC101060541	LSM8	PRKACB			ZMYM5	NDN	C17orf62	ACTR1B	CZIB	NT5M	PRSS36	GINS4_x000D_
DISC1	C12orf32	EPT1	LUC7L2	EMC3			ZNF280C	NPAS2	C17orf70	ACTR2	CYB5RL	S100A1	MTUS2	DPY19L3_x000D_
IGDCC4	C12orf35	GP1BB	LY96	MSRB1			ZNF577	OXTR	C17orf85	ACTR3	PLPP3	FCHO1	GPHA2	RASA2_x000D_
AKAP5	C12orf41	SEPT8	MAGED4B	SLC6A8				PAPPA	C17orf96	ACTR6	PATJ	METTL7B	RPS6KL1	RASL11A_x000D_
HAND2	C12orf47	LOC101060433	MAP2K3	TPGS2				PARVB	C17orf97	ACTR8	KANK4	P2RY6	ZNF628	COL27A1_x000D_
ZNF879	C12orf48	SLCO2A1	MAP3K8	NSMF				PDLIM3	C18orf56	ACVR1	PDE4B	RTP4	ZNRF4	ZBTB10_x000D_
ALPL	C12orf51	SFN	MAPRE3	SIK1				PID1	C18orf8	ACVR1B	DNAI4	IHH	FBP2	ZNF431_x000D_
LRRC37A3	C12orf62	ELF3	MARVELD1	EPS8L2				PKDCC	C19orf10	ACVR2A	ST6GALNAC3	ACAN	CCDC96	ZNF124_x000D_
FOXL1	C13orf1	PDE6G	MATN2	BDH2				POSTN	C19orf24	ACYP1	ST6GALNAC5	TMEM45B	MAMSTR	ADRA1B_x000D_
CLCN4	C13orf23	STMN2	MCM10	PRRC2A				PRR16	C19orf43	ACYP2	MIGA1	OVOL1	LSMEM1	DNAJC22_x000D_
BST1	C13orf27	LINC00921	MEG8	CTDNEP1				RARRES1	C19orf52	ADA	ADGRL4	BEX5	DAPK2	COL25A1_x000D_
TIGD7	C13orf33	FOLR1	MEIS3P1	COPG1				RBM24	C19orf54	ADAL	ADGRL2	RSPH9	IKZF2	SMTNL2_x000D_
CCNJ	C13orf34	ACP5	MEMO1	SUPT7L				RBP1	C19orf60	ADAM10	AL603750.1	AGPAT9	C4orf26	LAMA1_x000D_
ACTRT3	C13orf37	CBX7	MFAP4	ARL3				RCN3	C19orf66	ADAM12	SYDE2	C12orf60	VWA5B2	PARD3B_x000D_
HECW2	C14orf100	CHURC1-FNTB	MGST3	PITHD1				SAMD9	C19orf70	ADAM15	AC092807.3	ATP8A1	C15orf62	C11orf71_x000D_
RNF150	C14orf101	UGT1A1	MND1	CLEC11A				SCARF2	C1orf123	ADAM17	CCN1	ZDHHC23	TERT	CDH3_x000D_
CXCL6	C14orf102	NLRP2	MRPL30	TBC1D5				SCG5	C1orf63	ADAM19	SELENOF	HOXC4	UCN2	SLC29A4_x000D_
TMEM200A	C14orf106	GALNT14	MRPL53	NUPR1				SEMA5A	C1orf74	ADAM9	KYAT3	ABCC6	PCDHB10	GAS7_x000D_
ZBTB46	C14orf109	PSD4	MTHFD1L	DPH1				SFRP1	C1orf85	ADAMTS1	BTBD8	DPY19L2	GALNT18	TCTN2_x000D_
MICU3	C14orf112	SOD3	MTPN	NRP2				SLC9A7	C1orf86	ADAMTSL4	DIPK1A	EVPL	GNMT	ZNF253_x000D_
SCUBE1	C14orf124	GLIS2	MXD4	MIEN1				SLFN12	C20orf24	ADAR	CCDC18-AS1	SAMD13	NCKAP5	CDON_x000D_
NFATC1	C14orf126	LOC100996657	MXRA5	CMSS1				SLFN5	C21orf33	ADARB1	CNN3-DT	B3GAT1	GLYAT	TNIK_x000D_
UFSP1	C14orf129	C20orf112	N4BP2	AREL1				SOCS2	C21orf58	ADAT1	EEF1A1P11	MFAP3L	ZNF365	KIAA0895_x000D_
ANKRD1	C14orf131	MIR5193	NBL1	GUCD1				SRGN	C21orf59	ADCK1	RPL7P9	PITPNM3	CPNE9	NEIL3_x000D_
SFRP4	C14orf133	MIR21	NBPF10	FKBP9				SULF1	C22orf29	ADCK2	MFSD14A	SEMA4A	SCN5A	RGS17_x000D_
TNFSF4	C14orf135	MIR4647	NBPF14	LAMTOR2				THBS2	C2orf43	ADCK5	AC093157.1	CDHR5	LURAP1	EPOR_x000D_
PTHLH	C14orf138	LOC101060429	NCL	GLYR1				THY1	C2orf44	ADCY3	AMY2B	AQP8	UCN3	ARHGDIG_x000D_
SGCD	C14orf143	MAPT	NDUFS8	HDAC5				TIMP3	C2orf47	ADCY6	SCARNA2	NKAPL	CHRM3	TMED8_x000D_
HHIPL1	C14orf147	KRT222	NEURL1B	GID8				TMEM117	C3orf37	ADCY7	AL356488.2	COBL	ADAMTS16	CARF_x000D_
KCNT2	C14orf149	S100A2	NME2	C11orf95				TMEM217	C3orf58	ADCY9	SARS1	SLCO4C1	GLIS1	NPHP1_x000D_
ARHGAP31	C14orf153	PVRL1	NOMO1	DES				WIPF1	C4orf27	ADD1	GSTM5	HRCT1	PTPN7	CDKL1_x000D_
ZNF790	C14orf156	FAM192A	NOMO2	CPQ				XIST	C5orf28	ADD3	AL160006.1	GPR160	PTAFR	PCDHGA11_x000D_
TNRC6C	C14orf167	PALMD	NOMO3	NAA20				ZDHHC1	C5orf30	ADH5	PROK1	FBXO15	TIAM1	CDKN2C_x000D_
SLC8A1	C14orf173	TMEM59L	NOP56	ETHE1				ZEB2	C6orf1	ADIPOR1	ATP5PB	ACOT4	CIDEC	CDC6_x000D_
ZFP28	C14orf174	LOC101060511	NPEPL1	CLN6				ZNF469	C6orf106	ADIPOR2	INKA2	RDH12	LOC101060202	LRRC6_x000D_
KCNH1	C14orf179	CCDC94	NR2F1	USB1				ZNF471	C6orf203	ADK	SLC16A1-AS1	SRPK3	SLC45A2	NID1_x000D_
ZNF841	C14orf32	ASRGL1	NUTF2	APMAP				ZNF682	C6orf211	ADM	WARS2-AS1	ACMSD	PGLYRP4	CDCA2_x000D_
DNAH14	C14orf4	MYOZ1	NYNRIN	SLC29A1				ZNF738	C6orf48	ADM2	AC244669.1	STEAP2	DEFB132	DHODH_x000D_
C5orf46	C14orf43	LOC101060315	OSR1	KDM2A				ZSWIM3	C6orf57	ADNP	PDE4DIPP2	ACSM3	MYBPC1	PHKA1_x000D_
DCN	C14orf45	FAM47E	PCDH18	STAT5A					C6orf70	ADNP2	NBPF26	PKIB	CCIN	THAP9_x000D_
ABAT	C14orf78	LARGE	PCDH7	GTPBP2					C7orf10	ADO	RNVU1-19	TNFRSF4	ACHE	ZNF214_x000D_
ARHGEF34P	C14orf82	GSTT1	PCDHGB6	OST4					C7orf41	ADPGK	H2BP1	SLC16A10	CXorf36	ZNF589_x000D_
SLC46A1	C14orf85	AIM1	PDCD4	SEL1L					C7orf43	ADRM1	SRGAP2C	SDR42E1	C3orf62	CIT_x000D_
NCALD	C15orf17	ARHGAP4	PDE7B	CCDC142					C7orf49	ADSL	AC239859.5	PALM3	XDH	GPSM3_x000D_
ZNF347	C15orf23	LOC101060567	PDGFRA	FPGS					C7orf55	AEBP1	RNVU1-18	CLMN	DGKB	SLC43A1_x000D_
PDCD1LG2	C15orf24	FAM109B	PDXDC1	MAPK14					C8orf59	AEBP2	H3-2	ELMO3	CYP4F22	SLC25A27_x000D_
MMP16	C15orf29	LSR	PEX11B	POGZ					C9orf114	AEN	SRGAP2D	PPM1J	C1orf61	CDC45_x000D_
ITGA1	C15orf44	C1QB	PI4K2B	PI4KA					C9orf123	AFAP1	LINC02802	ZSWIM5	CALML6	CCDC149_x000D_
TIRAP	C15orf63	LAMB3	PI4KAP1	SRSF7					C9orf142	AFF1	RNVU1-15	RRAGD	AK8	KIAA0040_x000D_
GPR37	C16orf33	GATSL3	PIAS3	PDAP1					C9orf156	AFF4	NBPF15	TGFA	PHOX2B	HLA-DMA_x000D_
FGF1	C16orf35	MSLN	PIGC	HAUS1					C9orf3	AFG3L2	RNVU1-28	SYNDIG1	NRN1L	PKD1P1_x000D_
ACTBL2	C16orf42	TAGLN3	PKD1	EZH1					C9orf37	AFMID	SRGAP2B	MSMP	TRIM10	FBF1_x000D_
NTM	C16orf48	HDHD1	PLCL2	HMGXB3					C9orf69	AFTPH	LINC01145	PLCH1	AQP10	SLC16A7_x000D_
RASSF2	C16orf52	RARRES3	PLIN2	CUX1					C9orf89	AGA	AC245014.3	OCLN	WFDC3	LINC00941_x000D_
VSTM4	C16orf53	LAD1	PLSCR3	SORD					C9orf91	AGAP3	RNVU1-31	TLE6	PXT1	IFT140_x000D_
AFF3	C16orf56	INA	PLSCR4	RTF1					CA12	AGAP6	RNVU1-6	ZMAT1	GPR37L1	FXYD6_x000D_
PNPLA3	C16orf57	FAM134B	PNRC2	CHTF8					CARD14	AGBL5	LINC01719	CLDN23	PHYHIPL	BUB1_x000D_
ZFP14	C16orf61	ARHGAP27	POLR2J3	DDB2					CARKD	AGFG2	NOTCH2NLA	FAM159A	C15orf37	NUDT12_x000D_
ZNF461	C16orf63	BCL7A	POLR2J4	ARF6					CARS	AGGF1	NUDT4P2	CTTNBP2	TLL2	CALCRL_x000D_
ARHGAP42	C16orf68	MINOS1	POLR3C	TDP2					CASC4	AGK	RNVU1-29	RASEF	HTR1D	ZNF138_x000D_
TTLL11	C16orf7	ABP1	POLR3E	RPP25L					CCBL2	AGL	NBPF12	KCNIP1	PPP1R36	ZNF785_x000D_
PTGFR	C16orf75	NRARP	POLR3G	CHMP3					CCDC101	AGPAT1	AC242426.2	GCNT2	C10orf82	LRRC27_x000D_
HYKK	C17orf101	RTEL1-TNFRSF6B	POLR3GL	ECHDC1					CCDC104	AGPAT2	PDIA3P1	SYT2	AMZ1	PCDH1_x000D_
ZNF229	C17orf106	VGF	POM121C	NEK7					CCDC109B	AGPAT4	RNVU1-7	ILDR1	KRT33B	EPHX2_x000D_
KIF13A	C17orf37	IL2RG	PPFIBP2	MAN2A2					CCDC111	AGPAT5	NBPF11	ESRRG	ZAR1L	APOL2_x000D_
WNT2B	C17orf39	SFT2D3	PPM1K	TMEM259					CCDC23	AGPS	AC239809.3	HMGN5	CREB3L3	EAF2_x000D_
PKNOX2	C17orf42	PPAP2C	PPP1R3F	SETD7					CCDC53	AGRN	LINC01138	PRKAA2	GHRHR	CNTNAP3_x000D_
NAALADL1	C17orf45	HEATR8-TTC4	PPT2	POM121					CCDC84	AGTPBP1	RNVU1-27	PCLO	C6orf25	ALDH1A1_x000D_
DGKI	C17orf48	PRR24	PRDM8	ABLIM1					CCRN4L	AGTRAP	NUDT4B	LY6G6C	ZPLD1	PRR11_x000D_
CD200	C17orf53	RNF43	PRKAB2	DTX3L					CCT6B	AHCTF1	PDE4DIP	KLF8	KIF1A	ARHGEF4_x000D_
COLEC12	C17orf61	LOC100996496	PRKRIP1	VAPB					CD97	AHCY	NBPF9	PPFIA4	MUC21	PCSK9_x000D_
C15orf48	C17orf63	RAB6B	PRSS12	VMA21					CDRT4	AHCYL1	AC245297.3	ENTPD2	TLR2	BTBD19_x000D_
GLI2	C17orf71	LOC100996724	PSMA6	KIF13B					CECR5	AHCYL2	AC245297.1	AIFM3	RAMP3	AP4S1_x000D_
KMT2D	C17orf79	LRRC61	PTBP1	FOXN3					CENPBD1	AHI1	NBPF19	ZFP3	TMEM110	SH3TC1_x000D_
S1PR1	C17orf81	MIR1909	PTCD1	SUCO					CIRH1A	AHNAK	LINC00869	IQCA1	BAAT	SNCG_x000D_
MAML3	C17orf88	NUPL1	PTGS2	NDUFC2					CNIH	AHNAK2	H2BC18	TMEM56	RIMS2	RRM2_x000D_
FAT3	C17orf90	ABTB2	RAB24	GPR107					COL4A3BP	AHR	H3C13	CLYBL	C1orf168	CERS4_x000D_
ADAMTS12	C17orf91	LRRC16A	RAB34	MCMBP					CPEB3	AHSA1	H4C14	PTPRN2	TLL1	KIAA0895L_x000D_
ZNF610	C17orf95	HCP5	RAB3GAP2	SMG9					CPSF3L	AIDA	H3C14	STOX2	ILDR2	GYG2_x000D_
MAP3K7CL	C18orf10	TCAP	RAB43	SPRY1					CRAMP1L	AIFM1	H2AC18	MT1B	ANKRD34B	STK33_x000D_
BHMT2	C18orf19	FHOD3	RAB4B	CMC4					CRIPAK	AIG1	H2BC21	CA13	FAM163B	FAM161A_x000D_
ANXA8	C18orf22	APOM	RAP1B	CD109					CSRP2BP	AIMP2	H2AC19	GZMM	KLLN	RFX2_x000D_
ATRNL1	C18orf45	LOC100505729	RBM14	PIEZO1					CTGF	AIP	H3C15	ELSPBP1	POLN	NLRC5_x000D_
KIF26B	C18orf55	TSPAN33	RBM34	TSPYL4					CTSL1	AK1	H4C15	ZC2HC1C	ZSCAN5B	SEC31B_x000D_
FCHSD1	C19orf2	METTL21D	RCN1	POLR2K					CTXN1	AK2	H2AC20	NEURL2	C16orf89	WDR27_x000D_
EDNRB	C19orf22	LOC150776	RDH14	MICU2					CXorf40A	AK3	H2AC21	BCO2	TMC2	LPIN3_x000D_
SLC16A4	C19orf28	MYLPF	REXO1	DCAF8					CYFIP2	AKAP10	MINDY1	FAM110D	GPR151	TRPV2_x000D_
FMO1	C19orf29	PET112	RFFL	KIFC3					CYR61	AKAP11	PRUNE1	USP43	KRT84	LINC00909_x000D_
CCDC138	C19orf31	GALNT3	RGPD8	VPS13D					DARS	AKAP12	ZNF687	CRNN	PCDHA5	APOA1_x000D_
CARD16	C19orf42	TCF7L1	RHOJ	PTPN18					DBNDD1	AKAP13	NPR1	ABCB1	STRA8	ARG2_x000D_
LMOD1	C19orf50	C10orf35	RN7SL1	MTFP1					DCLK1	AKAP7	GBAP1	CCDC65	ICOSLG	VSIG10_x000D_
AKR1E2	C19orf56	RAP1GAP2	RNF115	CHST10					DEXI	AKAP8	KHDC4	PDK3	FAM198B	DTL_x000D_
MBNL1-AS1	C19orf6	FZD5	RNF31	ST6GAL1					DFNA5	AKAP8L	PMF1-BGLAP	SBSPON	PLGLA	ZNF883_x000D_
AGAP2-AS1	C19orf61	SERPINA1	RNU1-3	GPRC5C					DGCR14	AKIRIN1	GLMP	MUCL1	CYS1	HOXB-AS3_x000D_
ABCA10	C19orf62	AQP5	RNY3	MCTS1					DHRS11	AKIRIN2	IQGAP3	RASAL1	PRH1	ZNF808_x000D_
HSPB7	C19orf63	MARCH9	RP9P	CLUH					DIRC2	AKNA	NAXE	MESP2	HUNK	DSTNP2_x000D_
SCUBE3	C1orf107	LOC100996668	RPE	AAR2					DOM3Z	AKR1A1	KIRREL1	SEPP1	KCNJ4	ASAH2B_x000D_
HMCN1	C1orf124	LOC101060460	RPIA	FAM219A					DOPEY2	AKR1B1	LINC01133	FRMD4B	GPR137C	UBXN11_x000D_
ZNF528	C1orf128	FBXO41	RPL23AP53	ZSWIM8					DSCR3	AKR7A2	AL139011.2	SCIN	TNFRSF9	DDX39B_x000D_
FANCM	C1orf133	C10orf99	RPL26	TNFAIP2					DSP	AKT1	ITLN1	DOK7	NOG	HERC2P9_x000D_
PFKFB2	C1orf144	TRAF1	RPPH1	MIIP					DTNBP1	AKT1S1	AL591806.2	EPHX4	SYT14	MST1_x000D_
MAGOHB	C1orf149	FAM211B	RPS13	SRSF4					DUS2L	AKTIP	ADAMTS4	CATSPER1	FOLR2	ZNF417_x000D_
MFSD2A	C1orf151	FOXJ1	RPS26	CCDC167					DUSP28	ALAD	GCSHP5	RAB17	LPAL2	ABCA11P_x000D_
HTR7P1	C1orf163	PLA2G16	RUNX1	CHAMP1					DUSP8	ALCAM	DPT	MT1H	CCRL1	VEPH1_x000D_
RAPGEFL1	C1orf166	LOC100996628	SCARNA10	BIVM-ERCC5					EFTUD1	ALDH16A1	PRRX1	CCDC150	FAM101A	EME2_x000D_
MAGI2	C1orf19	GLB1L2	SCHIP1	SRRT					ELMO1	ALDH18A1	FMO3	MACROD2	SPINK4	TMEM67_x000D_
SIX1	C1orf212	VANGL2	SCRG1	FOXK2					ENDOG	ALDH1A3	FMO2	KLK8	KCNQ3	SNORD8_x000D_
C22orf46	C1orf218	PIM2	SERF1B	SMIM3					EPB41L4A	ALDH1B1	EEF1AKNMT	ODF3L2	PCDH11X	_x000D_
COL14A1	C1orf24	MT1F	SERF2	COA5					EPRS	ALDH2	DNM3OS	XKR4	FAM222A	_x000D_
RCAN3	C1orf25	LPHN1	SERPINF1	SC5D					ERO1L	ALDH3A2	TNFSF18	SPATA31D1	BSX	_x000D_
GPR153	C1orf41	CYP3A5	SFPQ	FAM219B					FAM101B	ALDH3B1	GAS5	DMBT1	SSPO	_x000D_
FMN1	C1orf55	AURKAPS1	SGK3	APOC1					FAM103A1	ALDH4A1	ZBTB37	CLEC4F	ASB18	_x000D_
ZNF154	C1orf57	EFR3B	SLC2A3	SUN1					FAM105B	ALDH6A1	COP1	FOXE3	PABPN1L	_x000D_
GRK4	C1orf59	TPSAB1	SLC35B2	NR4A1					FAM109A	ALDH7A1	CRYZL2P	CYP2A13	SCT	_x000D_
DBF4B	C1orf66	ZBED6CL	SLIT3	MPLKIP					FAM110A	ALDH9A1	ANGPTL1	ADCK3	ARL9	_x000D_
HS3ST3B1	C1orf71	KIAA1407	SMG1	MYLIP					FAM115A	ALDOA	KIAA1614	CDHR1	RTN4R	_x000D_
PLEKHA8	C1orf77	SNORA29	SNAP47	CPNE2					FAM127A	ALDOC	NIBAN1	RHOV	CYP4B1	_x000D_
	C1orf83	C17orf61-PLSCR3	SNHG5	STX18					FAM127B	ALG10B	SWT1	DCAF4L2	PRRG2	_x000D_
	C1orf93	PPP1R1A	SNHG6	IL1R1					FAM127C	ALG11	ODR4	AP1S3	PRSS41	_x000D_
	C1orf97	EPS8L1	SNORA10	DCAF12					FAM129B	ALG13	PLA2G4A	CDX1	FHDC1	_x000D_
	C20orf100	MESDC1	SNORA63	SNRPE					FAM134A	ALG14	RGS1	CHST9	SORCS2	_x000D_
	C20orf108	LOC100506639	SNORA70	MED17					FAM134C	ALG3	RO60	TRIM7	KIAA1462	_x000D_
	C20orf11	CYP27B1	SNORA7B	RAB11B					FAM173A	ALG5	B3GALT2	FZD3	PLCXD2	_x000D_
	C20orf111	PLCB2	SNORA8	TTYH2					FAM173B	ALG6	MIR181A1HG	SLC24A5	ANGPTL7	_x000D_
	C20orf117	CCNO	SNORD3A	BCL2L11					FAM175A	ALG8	TNNT2	SYCE3	FERMT3	_x000D_
	C20orf127	MIR1257	SNRPN	TNKS					FAM175B	ALG9	FMOD	NUP62CL	FOLR3	_x000D_
	C20orf177	MIR4691	SNURF	TPCN1					FAM178A	ALKBH1	ZC3H11A	SEC14L5	SPNS3	_x000D_
	C20orf191	ADAM12-OT1	SOBP	RAB11FIP1					FAM188A	ALKBH2	ZBED6	ESPNL	MIR600	_x000D_
	C20orf199	FBXO2	SOD2	NPRL2					FAM195A	ALKBH3	PLEKHA6	ABCB4	CYP2B7P1	_x000D_
	C20orf20	NAPSA	SOX13	AIMP1					FAM195B	ALKBH5	ELK4	APOBEC3B	HAPLN2	_x000D_
	C20orf29	LOC100996464	SRPX2	PRADC1					FAM35A	ALKBH6	RAB29	MIA	RHD	_x000D_
	C20orf3	PGBD5	STARD5	THTPA					FAM45A	ALKBH7	RAB7B	CA2	MGC39372	_x000D_
	C20orf30	PRR12	STRN	PPP1R15B					FAM46A	ALPK2	AL591846.1	CXCR5	C8orf31	_x000D_
	C20orf4	CELSR3	SULT1A1	KMT2B					FAM49B	ALS2	HSD11B1	PTGER1	ATP1A3	_x000D_
	C20orf43	C1orf27	SULT1A3	C2CD5					FAM57A	AMACR	UTP25	KCNMB3	ECSCR	_x000D_
	C20orf45	FAM57B	SULT1A4	C1D					FAM58A	AMD1	SERTAD4-AS1	SGK2	IDO2	_x000D_
	C20orf52	HKDC1	TAF13	B3GNT9					FAM60A	AMDHD2	RNU5A-8P	PGBD4	MIR4315-1	_x000D_
	C20orf55	LOC100630923	TAF4	REC8					FAM63A	AMFR	LINC00467	NPFF	LMAN1L	_x000D_
	C20orf7	LEPREL4	TAX1BP3	TOE1					FAM63B	AMMECR1	PACC1	NCMAP	LOC440173	_x000D_
	C20orf72	RIPK4	TBRG4	SMIM12					FAM65A	AMMECR1L	FLVCR1-DT	HS3ST1	KRTAP2-3	_x000D_
	C21orf126	TMEM8A	TBX18	R3HDM4					FAM69A	AMOTL2	FLVCR1	PIFO	JAM2	_x000D_
	C21orf24	KIAA1033	TBX2	C1orf115					FAM73A	AMZ2	VASH2	SPRR2F	UMODL1	_x000D_
	C21orf30	DGAT2	TCFL5	URGCP					FAM73B	ANAPC1	KCNK2	SHANK2	FAM138A	_x000D_
	C21orf34	LOC101060729	TCP1	HNRNPUL1					FAM86A	ANAPC10	EPRS1	PNMAL2	NETO1	_x000D_
	C21orf45	CSF2RB	TCP11L1	NDUFB4					FAM92A1	ANAPC11	MTARC2	C16orf90	SLC52A1	_x000D_
	C21orf51	DDC	TEK	CDKN2A					FAM96A	ANAPC13	MTARC1	HNF1A	SHC4	_x000D_
	C21orf55	MEF2B	TGFB3	SEMA4B					FAM96B	ANAPC4	SEPTIN7P13	TSGA10	MOBP	_x000D_
	C21orf56	MEF2BNB	THOC3	TACC3					FBXO18	ANAPC5	H3-3A	EXD1	SLC34A1	_x000D_
	C21orf57	ELMSAN1	TMEM11	GSE1					FDX1L	ANAPC7	LIN9	KCP	PPFIA2	_x000D_
	C21orf66	WDR62	TMEM199	ACADSB					FEM1A	ANGEL1	COQ8A	SGCZ	ART3	_x000D_
	C21orf7	MMP24	TMOD2	ERP44					FGFR1OP	ANGEL2	ZNF678	HIST1H1E	CHRNA4	_x000D_
	C21orf70	SLC6A19	TOMM7	PEG10					FLVCR2	ANGPTL4	OBSCN	BAGE2	HMP19	_x000D_
	C22orf13	LOC100506558	TRAPPC4	HS6ST1					FOXC1	ANKFY1	H2AW	KRTAP10-4	SKIDA1	_x000D_
	C22orf25	FBXO16	TRERF1	DGKZ					FOXC2	ANKHD1	FTH1P2	IRF6	MOG	_x000D_
	C22orf28	CDCP1	TRIM61	C2orf68					FRS3	ANKIB1	RHOU	ALAS2	LILRB5	_x000D_
	C22orf30	GSTT2	TTC4	PNP					FTSJ2	ANKLE2	AL445524.1	VSIG1	LOC100287413	_x000D_
	C22orf36	C1orf51	TUB	STXBP2					FTSJD1	ANKMY2	PCNX2	IGSF1	GPR144	_x000D_
	C22orf40	BIK	TUG1	PPP6R1					FTSJD2	ANKRA2	GNG4	NOVA1	SLC22A24	_x000D_
	C22orf9	GLTPD2	TWIST1	SH3BGRL2					FUK	ANKRD10	ERO1B	ZDHHC15	OBP2A	_x000D_
	C2orf18	LINS	TWIST2	NAGA					GARS	ANKRD11	RYR2	N4BP3	PAPPA-AS1	_x000D_
	C2orf24	F8	TXNDC5	SLC43A2					GATS	ANKRD12	EXO1	SGPP2	EPHA1	_x000D_
	C2orf25	F2	TXNIP	ELMOD3					GBAS	ANKRD13A	ADSS2	MYADML2	ZNF280B	_x000D_
	C2orf28	SUSD2	UBA7	ORC3					GCN1L1	ANKRD13C	AL390728.5	KIAA0754	CSF1R	_x000D_
	C2orf29	FAM26F	UBXN6	GPCPD1					GJC2	ANKRD16	ZNF731P	NTNG1	LOC284889	_x000D_
	C2orf30	NOV	UCK2	MSC					GLTPD1	ANKRD17	EIPR1	HOXC8	EYA2	_x000D_
	C2orf32	SYNGR3	UST	PCIF1					GLTSCR1	ANKRD26	AC108488.1	RPS6KA5	OPRM1	_x000D_
	C2orf34	GCHFR	VGLL3	TMEM243					GLTSCR2	ANKRD27	RNASEH1-AS1	FAM53A	MOGAT3	_x000D_
	C2orf37	CENPC1	VOPP1	NAA60					GNB2L1	ANKRD28	COLEC11	LCE1E	DDX43	_x000D_
	C2orf56	RAD51L3-RFFL	VPS8	RCOR1					GNRH1	ANKRD39	SOX11	OR3A3	CCDC17	_x000D_
	C2orf63	RGS9	WASH5P	DNMT3A					GPER	ANKRD40	SNORA80B	CCDC103	UCA1	_x000D_
	C2orf64	CARD11	WBP1	GSTM3					GRAMD3	ANKRD46	SLC66A3	POU5F1	CPNE6	_x000D_
	C2orf7	INHA	WDR33	DESI1					H1F0	ANKRD49	RN7SL674P	BAIAP3	PAX6	_x000D_
	C2orf79	TMEM229B	XKR8	ABCD4					H1FX	ANKRD50	CYRIA	FAM72A	ARHGAP33	_x000D_
	C3orf10	PKMYT1	ZBTB9	DNAJA4					H2AFX	ANKRD54	LDAH	IL6R	SYT8	_x000D_
	C3orf19	REEP6	ZFP37	PPP5C					H2AFY	ANKRD9	WDCP	ASIC2	ESAM	_x000D_
	C3orf21	TYROBP	ZGPAT	ELP6					H2AFZ	ANKS1A	SF3B6	WDR31	MYO7B	_x000D_
	C3orf23	PDZK1IP1	ZNF14	SYNE2					H3F3A	ANKS3	GAREM2	KCTD4	COL20A1	_x000D_
	C3orf26	CAPN3	ZNF26	SLC16A1					HARS	ANKZF1	SELENOI	ESRP2	SIGLEC1	_x000D_
	C3orf31	HOXC10	ZNF263	TMEM245					HCST	ANLN	CGREF1	LHX1	TENM2	_x000D_
	C3orf34	KCNQ1	ZNF486	IGF1R					HDGFRP3	ANO10	BABAM2	GAL3ST3	ADPRH	_x000D_
	C3orf39	C11orf84	ZNF550	SFSWAP					HEATR2	ANO6	RASGRP3	HOXA2	AP3B2	_x000D_
	C3orf50	EMX2	ZNF644	FOCAD					HIAT1	ANP32B	CRIM1-DT	SCAND3	NPFFR2	_x000D_
	C3orf54	MALL	ZNF674	C1QL1					HIATL1	ANPEP	CEBPZOS	RSPH1	APOA5	_x000D_
	C3orf59	PI16	ZNF696	WLS					HIST1H1C	ANTXR1	RPLP0P6	FLJ44635	FRMD5	_x000D_
	C3orf64	C14orf80	ZNF768	LAMTOR3					HIST1H2AC	ANTXR2	MAP4K3-DT	WNT16	EPS8L3	_x000D_
	C3orf75	CELF2	ZNF783	PPCDC					HIST1H2BD	ANXA1	STON1	RUSC1-AS1	FAM157A	_x000D_
	C4orf14	ZNF385A		PTPRU					HIST1H2BK	ANXA11	STON1-GTF2A1L	YIPF7	LOC339240	_x000D_
	C4orf18	HOXB9		IGIP					HIST2H2AA3	ANXA2	CFAP36	ALX4	RNF144A	_x000D_
	C4orf23	GRB14		MVB12B					HIST3H2A	ANXA5	PPP4R3B	GAGE1	TTC9B	_x000D_
	C4orf32	INPP5J		LOXL2					HLA-F	ANXA6	EIF3FP3	KLHL38	FOXQ1	_x000D_
	C4orf34	C7orf60		BCL2L2-PABPN1					HLA-G	ANXA7	AC016747.1	ELOVL7	ABCC9	_x000D_
	C4orf41	SLC29A2		BEX2					HMHA1	AP1B1	AHSA2P	C15orf53	CPEB1	_x000D_
	C5orf13	SPNS2		EMC4					HN1	AP1G1	PRELID1P6	RLN2	RP1L1	_x000D_
	C5orf21	KCNC4		SMC1A					HN1L	AP1M1	ARHGAP25	IL17REL	SPANXA1	_x000D_
	C5orf25	C17orf103		PIP5K1A					HOXA10	AP1S1	PCBP1-AS1	KRTAP8-1	CD300E	_x000D_
	C5orf32	JAG2		CHST2					HOXA6	AP1S2	ACTG2	FGF22	KRTAP20-2	_x000D_
	C5orf33	CCBL1		TGIF2					HOXA9	AP2A1	INO80B-WBP1	EFCAB12	OTOP2	_x000D_
	C5orf35	KIAA2018		LSM14B					HOXC13	AP2A2	HK2-DT	OR4D10	LOC541472	_x000D_
	C5orf37	ESPL1		PGPEP1					HOXC6	AP2B1	AC005034.3	ADRA1A	PGLYRP2	_x000D_
	C5orf39	ACSL5		DDX6					HRSP12	AP2M1	RN7SKP203	IQCD	CEACAM3	_x000D_
	C5orf41	RAB3A		YKT6					IARS	AP2S1	TRABD2A	UGT8	LOC100507472	_x000D_
	C5orf44	NR1D1		DDX20					ICA1	AP3B1	SNORD94	MGAT4A	LRRC37A4P	_x000D_
	C5orf5	LNP1		DHFR					ICAM3	AP3D1	ANAPC1P2	SPTLC3	PKD2L2	_x000D_
	C5orf53	C21orf2		ANKH					ICK	AP3M1	LINC01943	CLDN10	TTC16	_x000D_
	C5orf62	RNF208		PER3					ICT1	AP3M2	CYTOR	PACSIN1	TCTE1	_x000D_
	C6orf108	SLC35E2		HSPE1-MOB4					IL8	AP3S1	ANAPC1P4	CLDN16	PILRA	_x000D_
	C6orf111	C8orf44-SGK3		GADD45GIP1					IMPAD1	AP3S2	RNU2-63P	PDE6B	RGR	_x000D_
	C6orf115	PIDD		TAB1					IRAK2	AP4B1	LSP1P4	ATP8A2	PTCHD1	_x000D_
	C6orf125	SLC37A1		MVK					ITFG3	AP4E1	AC092835.1	PKP1	SPATA21	_x000D_
	C6orf129	KIAA0226		TMEM161A					ITGA10	APBA3	ANKRD36C	PRLHR	YWHAQP8	_x000D_
	C6orf130	COLGALT2		DPCD					ITIH5	APBB3	FAHD2CP	FAM196B	IGKC	_x000D_
	C6orf145	KIF12		BRAT1					KARS	APCDD1L	STARD7-AS1	IRX2	IGLV1-41	_x000D_
	C6orf153	SPACA4		MGME1					KCNK3	APEH	ITPRIPL1	CEP128	NFATC2	_x000D_
	C6orf160	RABL5		FAM117A					KCNK4	APEX1	AC159540.2	TTC22	EP400NL	_x000D_
	C6orf170	HPCA		FAM83H					KCNMB2	APEX2	AC092683.1	GPR62	LOC388948	_x000D_
	C6orf173	DMTN		DAB2IP					KCNN4	APH1A	IL18R1	BTC	WNK4	_x000D_
	C6orf192	NPIPA2		GPRC5B					KDELC1	APH1B	ST6GAL2	TLX1	CHRNA3	_x000D_
	C6orf61	KCTD14		DYSF					KDELC2	API5	SH3RF3-AS1	LGALS9B	HNF4A	_x000D_
	C6orf64	STAC2		MOB1B					KIAA0020	APIP	SEPTIN10	FBXL13	MEGF10	_x000D_
	C6orf66	CNIH2		URI1					KIAA0141	APLP1	RGPD5	NELL2	SNORA78	_x000D_
	C6orf72	TMPRSS5		PTPRS					KIAA0146	APLP2	LIMS3	CD33		_x000D_
	C7orf11	FAM71D		CNOT11					KIAA0195	APOBEC3C	MTLN	RINL		_x000D_
	C7orf20	CRYBB1		PHLPP1					KIAA0196	APOBEC3F	RGPD6	SLAIN1		_x000D_
	C7orf23	RHOF		CDK19					KIAA0247	APOBEC3G	MIR4435-2HG	RPS6KA1		_x000D_
	C7orf27	L1CAM		LRP6					KIAA0355	APOO	SOCAR	ANKEF1		_x000D_
	C7orf28A	WDR78		TMEM63A					KIAA0368	APOOL	PAX8-AS1	TRIM17		_x000D_
	C7orf28B	HPN		RRP36					KIAA0391	APP	CBWD2	AGBL1		_x000D_
	C7orf30	SYT13		EMC8					KIAA0430	APPBP2	AL078621.1	COL9A1		_x000D_
	C7orf36	PAX8		SYNPO					KIAA0556	APPL1	AC009404.1	MAS1L		_x000D_
	C7orf38	CAPN13		WRAP53					KIAA0907	APPL2	THORLNC	PCDHGB2		_x000D_
	C7orf40	TRPV6		RASSF4					KIAA0922	APRT	NIFK-AS1	SEC14L3		_x000D_
	C7orf42	ETV7		MKS1					KIAA0947	APTX	NIFK	EVX2		_x000D_
	C7orf44	ARHGEF37		NMRK1					KIAA1147	AQR	AC012306.2	ART1		_x000D_
	C7orf47	STK32B		DNALI1					KIAA1279	ARAF	MZT2B	DGAT2L6		_x000D_
	C7orf59	FCGR2A		KDM1A					KIAA1429	ARAP1	RHOQP3	PCDHA11		_x000D_
	C7orf68	ITIH4		ALAS1					KIAA1430	ARCN1	SMPD4BP	TMEM74B		_x000D_
	C7orf70	C17orf59		RCBTB1					KIAA1467	ARF1	NBEAP2	GPR31		_x000D_
	C8orf38	CISH		DCP1B					KIAA1468	ARF3	MGAT5	SLC13A5		_x000D_
	C8orf40	IQCJ-SCHIP1		SLC23A2					KIAA1598	ARF4	DARS1	OR10Q1		_x000D_
	C8orf41	DLL1		MYRF					KIAA1704	ARF5	BTF3L4P2	CGB1		_x000D_
	C8orf45	SRGAP3		GCC2					KIAA1715	ARFGAP1	MARCHF7	STRC		_x000D_
	C8orf55	SAMD10		SH3BP5					KIAA1731	ARFGAP2	TTC21B	CCDC154		_x000D_
	C8orf83	BLOC1S1-RDH5		CXCL1					KIAA1737	ARFGAP3	SCN9A	OR1N1		_x000D_
	C9orf102	ITGB4		MAFK					KIAA1967	ARFGEF1	SCN7A	ITM2A		_x000D_
	C9orf103	KCNIP3		SIRT6					LARS	ARFIP1	METAP1D	GAREM		_x000D_
	C9orf10OS	LOC100129518		MSH2					LDOC1L	ARGLU1	MAP3K20	C5orf49		_x000D_
	C9orf119	SYP		TMEM251					LEPRE1	ARHGAP1	ATP5MC3	NUDT13		_x000D_
	C9orf127	CAMK2B		FAM220A					LEPREL1	ARHGAP10	LNPK	COL11A2		_x000D_
	C9orf130	LOC101060555		SOS2					LEPREL2	ARHGAP12	LINC01116	ADM5		_x000D_
	C9orf21	SLC38A3		HECA					LHFP	ARHGAP17	TTC30B	CEP72		_x000D_
	C9orf23	LOH12CR1		ETV4					LILRB3	ARHGAP19	CHROMR	PPP1R1C		_x000D_
	C9orf25	GCOM1		LRP4					LOC100130071	ARHGAP21	TTN-AS1	MREG		_x000D_
	C9orf30	MYOM2		UGGT2					LOC148413	ARHGAP22	FTH1P20	POU4F1		_x000D_
	C9orf46	MCHR1		RAB14					LOC401127	ARHGAP23	ITPRID2	SYT12		_x000D_
	C9orf5	MYBPC3		FAM210B					LOC441155	ARHGAP24	PDE1A	NUP210		_x000D_
	C9orf6	ADAP2		EDNRA					LOC642852	ARHGDIA	FRZB	SH2B2		_x000D_
	C9orf7	GPR126		KLF16					LOC646214	ARHGEF1	ZNF804A	ANKRD29		_x000D_
	C9orf75	HNF1B		MMP19					LOC653080	ARHGEF10	ANKAR	TTC39A		_x000D_
	C9orf80	C5orf45		PAXBP1					LOC653375	ARHGEF12	NEMP2	SND1-IT1		_x000D_
	C9orf82	RGS20		C2CD2L					LOC728554	ARHGEF17	CAVIN2	PYY2		_x000D_
	C9orf86	YJEFN3		PDK2					LOC729852	ARHGEF18	TMEFF2	TMEM196		_x000D_
	C9orf90	LRG1		COA4					LOC730098	ARHGEF2	ANKRD44	LCN15		_x000D_
	C9orf95	RAPGEF3		RCHY1					LPPR2	ARHGEF3	MOB4	C14orf105		_x000D_
	CABC1	RUNDC3A		TRUB1					LRRC29	ARHGEF6	RFTN2	FAM135B		_x000D_
	CALN1	PLD6		AMT					LRRC8E	ARHGEF7	PLCL1	RGAG4		_x000D_
	CAMSAP1L1	CNTFR		TOM1L1					LSMD1	ARID1A	MAIP1	DNAJC6		_x000D_
	CAPS2	RAB20		SUGP2					LYPD1	ARID3A	SGO2	C21orf90		_x000D_
	CATSPER2	RAP1GAP		EHD3					LYRM5	ARID4A	CDK15	NCRNA00185		_x000D_
	CBARA1	SPTBN2		UCK1					MARCH2	ARID4B	ICA1L	GOLGA6L10		_x000D_
	CCDC109A	TMEM133		GTPBP1					MARCH5	ARID5B	RPL12P16	GNRHR2		_x000D_
	CCDC123	C20orf85		SMYD5					MARCH6	ARIH1	MYOSLID	LINC00085		_x000D_
	CCDC128	BEND3		RCAN2					MARCH7	ARIH2	LINC01614	STAG3		_x000D_
	CCDC135	HAS3		MAOA					MARS	ARL1	AC012513.3	LINC00940		_x000D_
	CCDC15	RAB36		MED21					METTL13	ARL13B	LINC01963	FLJ45445		_x000D_
	CCDC16	BEAN1		MPC1					MGAT2	ARL16	CNOT9	MYLK3		_x000D_
	CCDC45	HOXA10-HOXA9		HSPB11					MGEA5	ARL2	RETREG2	CCDC177		_x000D_
	CCDC46	RTN4RL1		SENP3					MINA	ARL2BP	GLB1L	LOC100288358		_x000D_
	CCDC49	LOC101060363		MFSD12					MKI67IP	ARL4A	KCNE4	LOC389834		_x000D_
	CCDC5	C1orf56		BAG6					MKL1	ARL4C	HTR2B	CHRM4		_x000D_
	CCDC55	LOC101060412		NF2					MRE11A	ARL5A	PTMA	NOTCH4		_x000D_
	CCDC56	SMPDL3B		VAC14					MRP63	ARL5B	SCARNA5	DNM1P46		_x000D_
	CCDC72	OTUB2		ADAMTS9					MST4	ARL6IP1	SCARNA6	PASK		_x000D_
	CCDC76	ZSCAN16		COA6					MT1A	ARL6IP4	ACKR3	TXNDC2		_x000D_
	CCDC90A	BCORL1		SMCR8					MT1G	ARL6IP5	AC112721.2	LOC647859		_x000D_
	CCDC99	DNAH1		ARRDC4					MTERF	ARL6IP6	COPS9	PRKCQ		_x000D_
	CCL5	EBF3		CDK18					MTERFD1	ARL8B	ANKMY1	PAQR6		_x000D_
	CCR6	GPIHBP1		RNF111					MUC1	ARMC1	MTERF4	CDC25C		_x000D_
	CCRK	ABHD14A-ACY1		GPRC5A					MUM1	ARMC10	SEPTIN2	C8orf44		_x000D_
	CDC2	SIX2		BLOC1S6					MUT	ARMC6	AC024060.2	ENPP5		_x000D_
	CDC2L1	HEXIM2		EMC10					N6AMT2	ARMC7	THUMPD3-AS1	SCNN1A		_x000D_
	CDC2L2	MYBPH		SLC26A11					NACA2	ARMC8	CIDECP1	ACSM5		_x000D_
	CDC2L5	NEFL		UBE2S					NANOS3	ARMCX1	AC022384.1	NPM2		_x000D_
	CDC2L6	WNT7B		RNF139					NAPRT1	ARMCX2	TIMP4	RHBG		_x000D_
	CDC45L	MPP2		SVEP1					NARFL	ARMCX3	SNORA7A	ABCA7		_x000D_
	CDO1	KIAA1683		KAZN					NARG2	ARMCX5	FGD5-AS1	ABO		_x000D_
	CECR7	LOC729020		GIGYF2					NARS	ARMCX6	RBSN	PRG2		_x000D_
	CENTA1	FAM69B		VASH1					NDNL2	ARNT	RN7SL4P	TTC40		_x000D_
	CENTB2	KANK3		ENGASE					NGFRAP1	ARNT2	GALNT15	SULT1C2		_x000D_
	CENTD2	NKAIN1		KDM1B					NHP2L1	ARNTL	HMGB1P5	PFKFB1		_x000D_
	CENTG2	PRODH		TIMM10B					NHS	ARPC1A	AC112220.2	DSCR10		_x000D_
	CENTG3	CALML3		GM2A					NKX3-1	ARPC1B	TCEA1P2	SLC17A3		_x000D_
	CEP27	MYO1F		RARG					NRD1	ARPC2	ITGA9-AS1	HOOK1		_x000D_
	CGI-96	CRB3		SPDL1					NUPL2	ARPC3	VILL	GRAP2		_x000D_
	CHCHD8	LOC101060235		PACSIN3					OBFC1	ARPC4	ZNF619	ESP33		_x000D_
	CHCHD9	FLT4		AKAP17A					ORAOV1	ARPC5	ULK4	FRMD3		_x000D_
	CHES1	METTL21B		MMP15					PABPC3	ARPC5L	AC099329.1	ALOX15B		_x000D_
	CHI3L1	CCNJL		NLK					PANX2	ARPP19	KRBOX1	P2RX6		_x000D_
	CHP	SH2D5		TPRN					PAPD4	ARRDC2	POMGNT2	MYCN		_x000D_
	CHRNA5	DKKL1		FAM118A					PAPD5	ARRDC3	ZNF852	KLHL14		_x000D_
	CICE	NR0B2		ABHD16A					PAQR4	ARSA	ZNF660	C4orf29		_x000D_
	CIDECP	HIST1H4A		PTPRN					PCNX	ARSB	ZNF501	NPY1R		_x000D_
	CIP29	CD22		TEN1					PCNXL2	ARSD	KIF15	MUC4		_x000D_
	CLDN14	KLHL26		LIMD2					PCNXL3	ARSJ	CLEC3B	RGL4		_x000D_
	CLDND2	LAT2		CEP70					PDDC1	ARSK	PTH1R	CPAMD8		_x000D_
	CLRN1	C11orf30		CREB3L4					PDE4A	ARV1	AC104447.1	MDH1B		_x000D_
	CNO	OASL		GIGYF1					PHF15	ASAH1	FCF1P2	IGF2-AS		_x000D_
	COBRA1	WHSC1		SRD5A3					PHF16	ASAP1	QARS1	GLB1L3		_x000D_
	COPG	ZBTB7C		ITPKC					PHF17	ASAP2	INKA1	KLK7		_x000D_
	CORO2A	CMTM8		VSTM2L					PIGY	ASAP3	TRAIP	SLC47A1		_x000D_
	COX4NB	YBX2		RILP					PLEKHN1	ASB1	NAA80	HILS1		_x000D_
	CP110	MYO5B		CCSAP					POLQ	ASB3	DCAF1	SPINK13		_x000D_
	CRKRS	IGFLR1		DAPK1					POLR2J2	ASB6	DUSP7	FGF4		_x000D_
	CROP	C20orf141		DENND3					PPAP2A	ASB7	PHF7	KLK4		_x000D_
	CRSP9	C1orf106		FKBPL					PPAP2B	ASB8	ITIH3	MT3		_x000D_
	CRYBB2	PLS1		SMG8					PPAPDC1A	ASCC1	STIMATE	SMIM6		_x000D_
	CSDA	TMEM52		NDUFAF4					PPAPDC1B	ASCC2	SELENOK	MIR631		_x000D_
	CSF2RA	FATE1		CLPB					PPAPDC2	ASCC3	TASOR	C1orf127		_x000D_
	CSHL1	ERCC6-PGBD3		RNF6					PPP2R4	ASF1A	HTD2	C6orf52		_x000D_
	CSNK2A1P	RAET1L		CERS2					PQLC1	ASH2L	CFAP20DC	GOLT1A		_x000D_
	CTGLF3	SALL1		AURKB					PQLC3	ASL	KBTBD8	BEND5		_x000D_
	CTGLF7	GUCY1B3		CHID1					PRICKLE4	ASMTL	SUCLG2-AS1	MCTP1		_x000D_
	CTPS	PPAPDC3		C17orf75					PRKCD	ASNS	PSMC1P1	CRYGS		_x000D_
	CUGBP1	GDAP1L1		TBC1D1					PRKCDBP	ASNSD1	FTH1P23	C4orf47		_x000D_
	CUTL1	IRF5		STAT5B					PRKRIR	ASPH	PDZRN3	KIF17		_x000D_
	CXorf12	WNT10B		RHOBTB2					PRMT10	ASPSCR1	CNTN3	KIAA1671		_x000D_
	CXorf26	ALS2CL		KAT8					PROSC	ASS1	FAM86DP	CTAG2		_x000D_
	CXorf39	C11orf52		TCN2					PRRT3	ASTN2	ZNF717	KLHDC7A		_x000D_
	CXorf40B	SEMA5B		CDPF1					PRUNE	ASXL1	ROBO2	LOC154761		_x000D_
	CXorf45	LIPE		CNNM4					PTPLA	ASXL2	EPHA3	GDPD3		_x000D_
	CXorf64	C1orf213		MITF					PTPLAD1	ATAD1	DHFR2	CTSL2		_x000D_
	CYBASC3	SOX15		TBCK					PTPLAD2	ATAD3A	MTRNR2L12	EFHB		_x000D_
	CYCSL1	SLC6A17		KLC4					PTPLB	ATE1	RIOX2	PRSS27		_x000D_
	CYLN2	TRIM15		TREX1					PTRF	ATF1	ST3GAL6	CCDC163P		_x000D_
	CYTSA	ZBED2		JMY					PTRH1	ATF2	TOMM70	PLAC8		_x000D_
	CYTSB	KCNH3		IQCE					PVRL2	ATF3	CEP97	C5orf38		_x000D_
	DAPP1	ARSG		CHTOP					PVRL3	ATF4	LINC00882	FER1L4		_x000D_
	DCI	IL18BP		FIBIN					QARS	ATF5	DUBR	ANO7		_x000D_
	DDEF2	CASZ1		RTCA					QTRTD1	ATF6	CIP2A	N4BP2L1		_x000D_
	DDX39	GFAP		PTPN23					RAB7L1	ATF6B	NECTIN3	CAPN12		_x000D_
	DEM1	ELTD1		NCS1					RARS	ATG10	NEPRO	GLDC		_x000D_
	DENND2C	HOXB13		EFNB2					RASSF5	ATG12	CFAP44	BLM		_x000D_
	DGCR11	SERPIND1		PPP6R2					RBKS	ATG16L1	USF3	ADCY2		_x000D_
	DHFRL1	MIR3658		TFEB					RFESD	ATG2A	QTRT2	CCDC151		_x000D_
	DIMT1L	LOC100652930		PLEKHH2					RFWD2	ATG3	AC093010.2	OXCT2		_x000D_
	dJ341D10.1	NT5C1B-RDH14		F11R					RFX1	ATG4A	LSAMP	SNORA45		_x000D_
	DKFZp434K191	FITM1		TSTD1					RNF219	ATG4B	BZW1P2	PISRT1		_x000D_
	DKFZP564O0523	GALNT16		POLM					RNMTL1	ATG4C	HCLS1	EGLN3		_x000D_
	DKFZp667M2411	FCRL5		MOB3A					RQCD1	ATG4D	WDR5B-DT	TMEM178A		_x000D_
	DKFZp686O24166	ZBED3		LURAP1L					SARS	ATG5	SLC49A4	KIAA1804		_x000D_
	DKFZp761P0423	TRIM55		RRP9					SATB2	ATG7	HACD2	LINC00472		_x000D_
	DMC1	TMEM169		HPS4					SCO2	ATG9A	LINC02614	C1orf186		_x000D_
	DNCL1	MMP28		C9orf72					SDCCAG3	ATIC	HMCES	RORC		_x000D_
	DULLARD	ZSCAN32		MMAB					SDHAP2	ATL2	H1-10	LOC728407		_x000D_
	DUSP19	C10orf114		ANAPC2					SELK	ATL3	RPL32P3	HELLPAR		_x000D_
	DUXAP3	PLIN4		LGALSL					SELM	ATM	AC083799.1	C7orf63		_x000D_
	ECGF1	KCNE1L		NCAPD3					SELO	ATMIN	IL20RB	SLC34A2		_x000D_
	ECOP	IGFL2		ZXDC					SELT	ATOX1	AC046134.2	KDM4D		_x000D_
	EDG1	NAGS		SMCHD1					SEP15	ATP10A	PXYLP1	LOC728819		_x000D_
	EEF1AL7	C7orf61		HSD17B14					SEPN1	ATP11B	SLC9A9	CDKL2		_x000D_
	EFHA1	SAMD12		DLG3					SEPT10	ATP11C	DIPK2A	CXorf57		_x000D_
	EIF2C1	ATG9B		DNM1					SEPT11	ATP13A1	AGTR1	UBXN10		_x000D_
	EIF2C2	BAIAP2L2		CDK16					SEPT2	ATP13A2	SELENOT	CTA-313A17.5		_x000D_
	EIF2C3	SLC6A3		HNRNPDL					SEPT6	ATP13A3	IGSF10	BMP8B		_x000D_
	EIF4EBP3	ATP5J2-PTCD1		CXADR					SEPT9	ATP1A1	ARHGEF26	KIAA1958		_x000D_
	EMX2OS	LOC128322		BUB1B					SEPW1	ATP1B1	C3orf33	KCNQ4		_x000D_
	EPHA10	AIPL1		TSR3					SERHL	ATP1B3	SCARNA7	LOC100862671		_x000D_
	EPPB9	FAM21C		CREB3L1					SETD8	ATP2A2	KRT8P12	LOC100506965		_x000D_
	ESRRAP2	KRT6C		TIFA					SF3B14	ATP2B1	RPL23AP42	LOC101060692		_x000D_
	FABP5L2	C17orf76-AS1		SLC35F6					SGOL2	ATP2B4	BCHE	LOC613206		_x000D_
	FAM100A	TTC9		HENMT1					SHANK3	ATP2C1	EGFEM1P	LOC100996817		_x000D_
	FAM100B	PNMA6A		PARP16					SHFM1	ATP6AP1	RPL22P1	SPDYE2B		_x000D_
	FAM108A2	NME5		NEURL4					SHROOM4	ATP6AP2	TERC	AC018804.7		_x000D_
	FAM108A3	MARK1		UBR1					SKIV2L2	ATP6V0A1	Telomerase-vert	DNAH2		_x000D_
	FAM108C1	PADI2		CSDC2					SLC16A12	ATP6V0A2	NAALADL2	OTTHUMG00000178019		_x000D_
	FAM10A4	TMEM92		ITPKB					SLC22A23	ATP6V0B	LINC00578	CD37		_x000D_
	FAM10A7	SCN2B		PPIF					SLC22A4	ATP6V0C	LAMP3	DRD5P1		_x000D_
	FAM113A	EPHB1		POLL					SLC24A6	ATP6V0D1	LINC00888	LOC157503		_x000D_
	FAM113B	ACVR2B		CLASRP					SLC31A2	ATP6V0E1	SNORA63D	ZNRD1-AS1		_x000D_
	FAM116A	KCNJ12		DYNC1LI1					SLC4A5	ATP6V0E2	MAP3K13	LOC100652902		_x000D_
	FAM116B	DDN		PAGR1					SLMO1	ATP6V1A	MASP1	KCNT1		_x000D_
	FAM119A	SCNN1D		MZT2A					SMCR7L	ATP6V1B2	P3H2	SNORA77		_x000D_
	FAM119B	CAMK2N2		BAALC					SMEK2	ATP6V1C1	TMEM44-AS1	SNORA42		_x000D_
	FAM125A	TMEM63C		FUNDC2					SNX22	ATP6V1D	AC046143.1	SNORA70C		_x000D_
	FAM125B	GRIK3		JAG1					SOLH	ATP6V1E1	APOD	LOC100507562		_x000D_
	FAM128A	SPP1		CENPW					SP2	ATP6V1F	MUC20-OT1	NULL		_x000D_
	FAM14B	GJA9		HIRA					SPG20	ATP6V1G1	DYNLT2B			_x000D_
	FAM153B	GJA9-MYCBP		PHF6					SPRN	ATP6V1H	RNF168			_x000D_
	FAM158A	SLC11A1		ABHD3					SPSB3	ATP7B	NCBP2AS2			_x000D_
	FAM164A	KRT81		PNPLA4					SQRDL	ATP8B1	MELTF			_x000D_
	FAM165B	MIA-RAB4B		IFT27					SRPR	ATP8B2	AC132008.2			_x000D_
	FAM176A	PRELP		AGO1					SSFA2	ATP9A	RUBCN			_x000D_
	FAM176B	GKAP1		SMG6					SSSCA1	ATPAF1	ZNF876P			_x000D_
	FAM18B	ANKRD23		MINK1					ST5	ATPAF2	ZNF141			_x000D_
	FAM18B2	ADAP1		CORO2B					STC1	ATRIP	ATP5ME			_x000D_
	FAM190B	ARHGAP8		UBALD1					STRA13	ATRN	SLC49A3			_x000D_
	FAM26E	PIANP		SOS1					SUV39H1	ATXN1	AC139887.2			_x000D_
	FAM36A	DNMT3B		SEMA4C					SUV420H1	ATXN10	SPON2			_x000D_
	FAM38A	MYEF2		SEMA3F					SYT15	ATXN1L	CTBP1-DT			_x000D_
	FAM39DP	TMEM114		CACFD1					TARS	ATXN2	NSD2			_x000D_
	FAM39E	RHPN1		DDX54					TBCE	ATXN3	SCARNA22			_x000D_
	FAM40A	KLK5		PFDN4					TCEB1	ATXN7L3	NELFA			_x000D_
	FAM40B	CMTM5		CWC22					TCEB2	AUH	NOP14-AS1			_x000D_
	FAM44B	C5orf55		WIPF2					TCEB3	AUP1	FAM86EP			_x000D_
	FAM48A	SALL4		WARS2					TCTEX1D2	AURKA	ZBTB49			_x000D_
	FAM54A	PTGDR2		PTK2B					THAP10	AURKAIP1	NSG1			_x000D_
	FAM54B	ELFN1		NPTXR					TMEM136	AVEN	CYTL1			_x000D_
	FAM62B	FAM179B		HEXIM1					TMEM173	AVL9	LINC02482			_x000D_
	FAM70B	SHISA7		FBRSL1					TMEM189	AVPI1	AC093323.1			_x000D_
	FAM72B	EXOC3L4		MLYCD					TMEM194A	AXIN1	CPZ			_x000D_
	FAM75C1	NIPAL4		SH3BGR					TMEM2	AXL	C1QTNF7			_x000D_
	FAM82A2	ADAMTS13		PPP1R3B					TMEM206	AZI2	ADGRA3			_x000D_
	FAM83F	SHISA2		SUFU					TMEM5	AZIN1	KLF3-AS1			_x000D_
	FAM90A3	WNT7A		TRAPPC11					TMEM55A	B2M	TLR1			_x000D_
	FARSLB	AMIGO3		KLHL42					TMEM55B	B3GALNT1	TLR6			_x000D_
	FBXL10	BMP8A		PRKX					TMEM57	B3GALNT2	GABRA2			_x000D_
	FBXL11	DYX1C1		ARFGEF2					TMEM66	B3GALT6	CORIN			_x000D_
	FCAR	CLDN1		PNISR					TOMM70A	B3GAT3	USP46-DT			_x000D_
	FCGR2B	LOC101060589		YLPM1					TRIM66	B3GNT2	DANCR			_x000D_
	FCGR3B	DIEXF		ACOT13					TROVE2	B3GNTL1	RASL11B			_x000D_
	FCRLB	TUBA3C		ACP6					TSPAN10	B4GALT1	AC058822.1			_x000D_
	FER1L3	CRX		MMP11					TSSC1	B4GALT2	CRACD			_x000D_
	FGL1	MT1M		DNAJC2					TSTA3	B4GALT3	AC115223.1			_x000D_
	FKBP9L	DERL3		CMC2					TWISTNB	B4GALT4	CENPC			_x000D_
	FKSG30	GRASP		LSM6					UFD1L	B4GALT5	UBA6-AS1			_x000D_
	FLJ10081	BTBD11		SYNGR1					UQCC	B4GALT7	SULT1E1			_x000D_
	FLJ10213	LOC100506538		DRAM2					UQCRHL	B9D1	MTHFD2L			_x000D_
	FLJ10357	BGLAP		EPB41L1					USMG5	B9D2	EREG			_x000D_
	FLJ10374	ZNF536		PPP1R26					UTP11L	BACE1	AREG			_x000D_
	FLJ10986	HSF2BP		RABGGTA					VAMP8	BACE2	FAM47E-STBD1			_x000D_
	FLJ12949	ASGR1		ARHGEF9					VARS	BAD	STBD1			_x000D_
	FLJ14213	TMEM151A		DCHS1					VPS37D	BAG2	SHROOM3			_x000D_
	FLJ20125	C2CD4C		ANK3					WARS	BAG3	SEPTIN11			_x000D_
	FLJ20254	PARD6B		MRGPRF					WBP5	BAG4	THAP9-AS1			_x000D_
	FLJ20444	TMEM180		ETNK2					WBSCR22	BAG5	ABRAXAS1			_x000D_
	FLJ20489	SHISA9		TADA1					WBSCR27	BAIAP2	HERC3			_x000D_
	FLJ20628	PAX2		WWOX					WDR34	BAIAP2L1	UNC5C			_x000D_
	FLJ20699	EDARADD		ABRACL					WDR60	BAK1	AP002026.1			_x000D_
	FLJ20718	FAM83A		ESYT2					WDR67	BAMBI	ADH1B			_x000D_
	FLJ22222	HSPA4L		TRIM47					WDYHV1	BANF1	H2AZ1			_x000D_
	FLJ23584	LOC100506403		WDR83					WIBG	BANP	AC098487.1			_x000D_
	FLJ25363	TMCC3		TRAPPC9					WRB	BAP1	EEF1A1P9			_x000D_
	FLJ31306	ELAVL3		ATG2B					XRCC6BP1	BASP1	NPNT			_x000D_
	FLJ33630	CDH15		TBKBP1					YARS	BAX	MCUB			_x000D_
	FLJ33996	FXYD7		DOT1L					ZAK	BAZ1A	FAM241A			_x000D_
	FLJ35258	BCMO1		FLYWCH1					ZCCHC11	BAZ1B	ALPK1			_x000D_
	FLJ35390	P2RY11		POLI					ZCCHC6	BAZ2B	ZGRF1			_x000D_
	FLJ36131	ZNF792		TAPBPL					ZCWPW1	BBC3	AC004057.1			_x000D_
	FLJ36848	LOC100996643		TTI1					ZFP112	BBS1	CEP170P1			_x000D_
	FLJ38482	ADAD2		SULF2					ZFPM1	BBS10	SEPTIN7P14			_x000D_
	FLJ38717	CCDC108		TIMM21					ZFYVE20	BBS2	PRDM5			_x000D_
	FLJ39827	DCDC2		SUDS3					ZNF213	BBS4	SMIM43			_x000D_
	FLJ40504	B3GNT8		PROSER1					ZNF259	BBS7	ABHD18			_x000D_
	FLJ40722	DNAH5		RAB15					ZNF271	BBS9	AC078850.1			_x000D_
	FLJ42627	GIPC3		CSRNP1					ZNF593	BBX	JADE1			_x000D_
	FLJ43681	TBX19		TMEM186					ZNF653	BCAP29	PCDH10			_x000D_
	FLJ44054	PRKCG		SRCAP					ZNRD1	BCAP31	NOCT			_x000D_
	FLJ44124	UGT2B7		GABBR1					ZUFSP	BCAR1	AC093890.1			_x000D_
	FLJ46309	CEACAM6		COLGALT1						BCAR3	PRMT9			_x000D_
	FLJ46552	SLC44A3		POLD1						BCAS2	MAB21L2			_x000D_
	FLJ46906	LOC100996620		CAMKK1						BCAS4	GATB			_x000D_
	FLJ90086	WWC1		TMCC1						BCAT1	MIR4453HG			_x000D_
	FMN2	PTP4A3		SLC17A9						BCAT2	TMEM131L			_x000D_
	FRAG1	GPR35		FANCC						BCCIP	SFRP2			_x000D_
	FRAP1	EPB41L4B		ZBTB18						BCDIN3D	GUCY1A1			_x000D_
	FREQ	POU2F2		THEMIS2						BCKDHA	AC104083.1			_x000D_
	FTHL11	SLC30A3		GLUL						BCKDHB	GUCY1B1			_x000D_
	FTHL12	DOC2A		HDAC11						BCKDK	TDO2			_x000D_
	FTHL16	ENTHD2		ID4						BCL10	GASK1B			_x000D_
	FTHL2	H1FNT		PMS1						BCL2L1	HPF1			_x000D_
	FTHL3	BZRAP1		TNRC18						BCL2L12	HAND2-AS1			_x000D_
	FTHL7	GGN		ATRX						BCL2L13	WWC2			_x000D_
	FTHL8	HOXB8		DHTKD1						BCL2L2	PRIMPOL			_x000D_
	FVT1	CSF3		NID2						BCL3	CENPU			_x000D_
	FXC1	DZANK1		DENND2A						BCL6	CFAP97			_x000D_
	GCET2	AMH		TSEN54						BCL7B	EXOC3-AS1			_x000D_
	GIYD1	SLC5A9		ATAD3B						BCL7C	PP7080			_x000D_
	GLT25D1	PRR7		ACBD5						BCL9L	SLC9A3-AS1			_x000D_
	GOLPH4	PRSS53		LLGL2						BCLAF1	AC026412.1			_x000D_
	GP1BA	DND1		SLC9A8						BCOR	ICE1			_x000D_
	GPR124	DAK		PTPRD						BCS1L	TENT4A			_x000D_
	GPR172A	C2orf53		SMO						BECN1	MIR4458HG			_x000D_
	GPR175	TPD52		NAA50						BEND6	SNHG18			_x000D_
	GPR177	FXYD2		EMC1						BEND7	ATPSCKMT			_x000D_
	GPR89C	LYPD5		IST1						BET1	MARCHF6			_x000D_
	GSTTP2	WDR85		VWA1						BET1L	OTULINL			_x000D_
	GUSBL1	BIRC7		FSD1						BEX4	EEF1A1P13			_x000D_
	GUSBL2	CNFN		GET4						BFAR	OTULIN			_x000D_
	H3F3B	C18orf54		REEP2						BGN	FTH1P10			_x000D_
	HADH2	C5orf54		NCAPH						BICD2	AC025181.2			_x000D_
	HAS2AS	CCR10		SLC7A11						BID	TARS1			_x000D_
	HBXIP	DNAH11		TUBGCP3						BIN1	AC138409.2			_x000D_
	HCCA2	CCDC176		HSBP1L1						BIN3	CPLANE1			_x000D_
	HCG2P7	SUV420H2		DHX58						BIRC2	C7			_x000D_
	HCG4	AQP2		FAM216A						BIRC5	C6			_x000D_
	HDAC7A	CLCNKA		SERPINI1						BIRC6	GHR			_x000D_
	HDGF2	CRYBB3		SGPP1						BIVM	SELENOP			_x000D_
	HDHD1A	FHIT		MDM4						BLCAP	AC025171.1			_x000D_
	HIATL2	WNT6		TMCC2						BLMH	ZNF131			_x000D_
	HIP2	SPTB		RNF169						BLOC1S1	TMEM267			_x000D_
	HISPPD2A	CACNA1A		ZFAT						BLOC1S2	NNT-AS1			_x000D_
	HIST1H4C	B3GNT7		STAP2						BLVRA	FGF10			_x000D_
	HIST1H4K	NRTN		TCAIM						BLVRB	AC093297.2			_x000D_
	HIST2H2AA4	SEMA4D		BDP1						BLZF1	ARL15			_x000D_
	HIST2H4A	RETN		SLC6A6						BMI1	MTREX			_x000D_
	HLA-A29.1	MYO3A		CEP85						BMP1	PLPP1			_x000D_
	HLA-DRA	MLIP		METTL17						BMP2K	SHLD3			_x000D_
	HLA-DRB3	UPK3A		CC2D1A						BMP4	ERBIN			_x000D_
	HLA-DRB4	DLGAP3		ZC3H7B						BMPR1A	AK6			_x000D_
	HMGB1L1	FTCD		REEP3						BMPR2	GTF2H2C			_x000D_
	HNRNPA3P1	ADAMTSL2		RICTOR						BMS1	GUSBP13			_x000D_
	HNRPA1L-2	HOXD10		TYRO3						BNC2	SMN2			_x000D_
	HNRPA1P4	ZFR2		TPRA1						BNIP1	AC138866.1			_x000D_
	HNRPA2B1	C2orf27A		ZNF232						BNIP2	GUSBP14			_x000D_
	HNRPC	KLHL31		LZTS1						BNIP3	AC146944.2			_x000D_
	HNRPDL	CCDC114		CCDC174						BNIP3L	OCLNP1			_x000D_
	HNRPH1	RBM20		TNFRSF25						BOK	NAIPP4			_x000D_
	HNRPH3	LOC653562		TRANK1						BOLA1	GUSBP9			_x000D_
	HNRPK	TRIM46		YTHDC2						BOLA3	GCNT4			_x000D_
	HNRPLL	EPN3		SGMS2						BOP1	CERT1			_x000D_
	HNRPM	TLDC1		SPTSSA						BPGM	SNORA47			_x000D_
	HNRPR	GPR4		C12orf75						BPHL	SCAMP1-AS1			_x000D_
	HNRPUL1	C19orf33		PTGS1						BPNT1	RPS3AP20			_x000D_
	HNRPUL2	ACTRT2		PDP1						BPTF	TENT2			_x000D_
	HRASLS3	SRSF12		BLOC1S4						BRCC3	AC008771.1			_x000D_
	HRB	MIR1304		HIPK1						BRD1	FAM151B			_x000D_
	HRIHFB2122	CAPNS2		TSPAN12						BRD2	RASGRF2			_x000D_
		RD3		FBXO25						BRD3	CKMT2-AS1			_x000D_
	HSGT1	SRCRB4D		RRAD						BRD7	EDIL3-DT			_x000D_
	HSPBL2	STAC		SCRN2						BRD8	TMEM161B-AS1			_x000D_
	HSPC111	IRX6		NFRKB						BRD9	NPM1P27			_x000D_
	HSPC157	EBLN2		MSANTD4						BRF2	KIAA0825			_x000D_
	HSPC171	LYG1		CA11						BRI3	SLF1			_x000D_
	HSPC268	GP9		NAA35						BRI3BP	MACIR			_x000D_
	HSZFP36	LRRC24		EFNB3						BRIX1	RPS3AP21			_x000D_
	ID2B	IQCF5		SRSF8						BRMS1	CAMK4			_x000D_
	IFP38	TBC1D26		LMBR1L						BRMS1L	TMED7-TICAM2			_x000D_
	IKZF3	LOC729966		TXNL4B						BRPF1	AC106786.1			_x000D_
	IL18	VGLL2		MDM1						BRPF3	PRDM6			_x000D_
	IL24	TTC21A		RWDD4						BRSK1	GRAMD2B			_x000D_
	IL25	SLC6A7		CHAC1						BRWD1	LMNB1			_x000D_
	IMAA	WAPAL		GALNT7						BSCL2	MARCHF3			_x000D_
	IQCC	NHLRC4		HBS1L						BSDC1	C5orf63			_x000D_
	IRX1	OSCAR		PTRHD1						BSG	LINC01184			_x000D_
	ISCA1L	NEU4		NEDD4L						BTAF1	IRF1-AS1			_x000D_
	ISG20L1	CYP4F12		PPL						BTBD1	SEPTIN8			_x000D_
	ITGB2	CST2		ELP5						BTBD10	SHROOM1			_x000D_
	ITGB4BP	KIAA1919		SIRT3						BTBD2	JADE2			_x000D_
	ITGB7	FBXO24		TYMP						BTBD3	MACROH2A1			_x000D_
	JARID1A	RIMKLA		TNKS2						BTBD6	CXCL14			_x000D_
	JMJD1A	KIAA1377		C8orf82						BTBD7	VTRNA2-1			_x000D_
	JMJD2B	ISLR2		SEZ6L2						BTD	SNHG4			_x000D_
	JUB	SLCO5A1		HIP1R						BTF3	SNORA74A			_x000D_
	KBTBD9	RNF144B		MYBBP1A						BTF3L4	STING1			_x000D_
	KCNH6	WNT10A		EMID1						BTG1	ANKHD1-EIF4EBP3			_x000D_
	KCNJ10	MFI2		PARS2						BTG2	CD14			_x000D_
	KCNQ1OT1	LTB4R		SMC5						BTG3	HARS1			_x000D_
	KIAA0090	ESPN		TMCO4						BTN2A1	PCDHGA6			_x000D_
	KIAA0114	FIGN		MSANTD3-TMEFF1						BTN3A1	PCDHGA9			_x000D_
	KIAA0174	C15orf59		TMCO6						BTN3A2	PCDHGA10			_x000D_
	KIAA0182	MATN4		ARHGEF11						BUB3	PCDHGB7			_x000D_
	KIAA0194	ELFN2		CYP51A1						BUD13	PCDHGA12			_x000D_
	KIAA0240	DLK2		ERAP2						BUD31	PCDHGC3			_x000D_
	KIAA0251	KCND1		CDC37L1						BYSL	DELE1			_x000D_
	KIAA0261	KCNE1		CDC42SE1						BZW1	LARS1			_x000D_
	KIAA0363	EDN2		CNOT3						BZW2	AC091959.1			_x000D_
	KIAA0406	TBX6		STK17A						C10orf88	JAKMIP2			_x000D_
	KIAA0427	SPDYA		NFE2L3						C11orf1	CARMN			_x000D_
	KIAA0494	AMHR2		LIFR						C11orf24	AC021078.1			_x000D_
	KIAA0495	RNF39		SFI1						C11orf49	RPL7P1			_x000D_
	KIAA0528	GNRH2		KIAA1109						C11orf54	ZNF300P1			_x000D_
	KIAA0562	CLDN9		B3GNT5						C11orf58	CCDC69			_x000D_
	KIAA0564	RIMBP3		CCSER2						C11orf68	GRIA1			_x000D_
	KIAA0664	ADAMTS3		ZNF286A						C11orf80	ZBED8			_x000D_
	KIAA0831	CNTD2		METTL23						C12orf29	RARS1			_x000D_
	KIAA0892	NODAL		CEP250						C12orf4	INSYN2B			_x000D_
	KIAA0913	FIGNL2		ISY1-RAB43						C12orf43	RANBP17			_x000D_
	KIAA1012	TMPRSS6		SHPRH						C12orf45	AC027309.2			_x000D_
	KIAA1026	SLC8A2		CAMSAP2						C12orf57	ARL10			_x000D_
	KIAA1128	CPM		PKM						C12orf65	AC145098.2			_x000D_
	KIAA1160	HAP1		GNAI1						C12orf76	AC139795.1			_x000D_
	KIAA1267	LYPD3		RANBP2						C14orf28	AC106795.1			_x000D_
	KIAA1274	FCRLA		GGT7						C14orf93	ZNF354B			_x000D_
	KIAA1285	AGXT		PEX12						C15orf39	ZNF454			_x000D_
	KIAA1310	LOC392288		KPTN						C15orf40	MRNIP			_x000D_
	KIAA1370	LOC100653217		FUBP1						C16orf70	HEIH			_x000D_
	KIAA1530	ARL2-SNX15		UBE2R2						C16orf72	RACK1			_x000D_
	KIAA1539	VAV3		CREBRF						C16orf87	TRIM52-AS1			_x000D_
	KIAA1600	PDGFB		HOXB7						C16orf91	FOXF2			_x000D_
	KIAA1602	SGCA		TRMT13						C17orf49	GMDS-DT			_x000D_
	KIAA1609	CD70		MIA3						C17orf58	AL391422.4			_x000D_
	KIAA1618	CCL22		IGF2BP3						C17orf80	AL590004.3			_x000D_
	KIAA1632	VCX2		KCNS3						C18orf21	LYRM4-AS1			_x000D_
	KIAA1641	ARHGEF16		MVB12A						C18orf25	BMP6			_x000D_
	KIAA1688	KLHDC7B		CCDC137						C19orf12	CD83			_x000D_
	KIAA1712	GTDC2		AP5Z1						C19orf25	CDKAL1			_x000D_
	KIAA1751	MARC1		CHML						C19orf48	CASC15			_x000D_
	KIAA1797	GSTA3		MB21D2						C19orf53	CMAHP			_x000D_
	KIAA1826	FGF11		SMURF1						C1GALT1	CARMIL1			_x000D_
	KIAA1949	GATA1		TRPV4						C1GALT1C1	H1-1			_x000D_
	KIAA2010	HOGA1		HOXB5						C1orf109	H3C1			_x000D_
	KIF14	NOXA1		LYST						C1orf122	H4C1			_x000D_
	KLHDC5	CTAGE5		UBOX5						C1orf131	H4C2			_x000D_
	KLHL35	PTCRA		PLIN3						C1orf174	H2AC4			_x000D_
	KLRAQ1	EDA2R		WASF1						C1orf198	H2BC3			_x000D_
	KRT18P13	PAQR9		MEST						C1orf216	H1-2			_x000D_
	KRT8P9	B3GNT4		SRSF3						C1orf35	H4C3			_x000D_
	KTELC1	CEACAM19		UBE2D1						C1orf43	H2BC4			_x000D_
	LAIR1	TRIM36		SMAD1						C1orf50	H2AC6			_x000D_
	LASS2	ZNF709		MALSU1						C1orf52	H1-4			_x000D_
	LASS5	CACNA1I		CCHCR1						C1orf53	H2BC5			_x000D_
	LASS6	FNDC7		SZT2						C1orf54	H2BC6			_x000D_
	LCN1L1	TRIM58		SGCE						C1QBP	H4C4			_x000D_
	LEP	CRIP3		PBDC1						C1QTNF1	H3C4			_x000D_
	LGTN	SPEM1		HEMK1						C1QTNF5	H2AC7			_x000D_
	LILRB1	RXFP3		GAS2L1						C1QTNF6	H2BC7			_x000D_
	LMOD3	C2orf82		RBFA						C1RL	H4C5			_x000D_
	LOC100008588	SLC16A8		TRPM7						C1S	H2BC8			_x000D_
	LOC100008589	IGSF22		HERC6						C20orf194	H2AC8			_x000D_
	LOC100125556	MRAP		ZBTB11						C20orf27	H3C6			_x000D_
	LOC100127913	CYP1A2		ZNF776						C21orf91	H1-3			_x000D_
	LOC100127918	IL4I1		EPHB2						C22orf39	H4C6			_x000D_
	LOC100127971	LOC100996782		FRAS1						C2CD2	H3C7			_x000D_
	LOC100127975	SELRC1		ITSN2						C2orf42	H2BC9			_x000D_
	LOC100127982	FAM186B		CNOT6L						C2orf49	H3C8			_x000D_
	LOC100127983	LOC101060181		FGD6						C2orf69	H2BC10			_x000D_
	LOC100127993	RELT		MBTPS2						C2orf76	H4C8			_x000D_
	LOC100128007	CLDN22		KBTBD6						C3orf14	HCG11			_x000D_
	LOC100128016	KCNJ15		EXOC6						C3orf38	H2BC11			_x000D_
	LOC100128056	C14orf180		RNF138						C3orf52	H2AC11			_x000D_
	LOC100128060	LOC101060193		POC5						C4orf46	H4C9			_x000D_
	LOC100128062	KIAA1549		ZNF24						C4orf48	H2BC12			_x000D_
	LOC100128084	TMOD1		AMN1						C5orf15	H2AC12			_x000D_
	LOC100128086	JSRP1		SAYSD1						C5orf22	ZNF391			_x000D_
	LOC100128098	TEX37		ORAI1						C5orf24	H2BC13			_x000D_
	LOC100128115	NCCRP1		PYGO2						C5orf34	H2AC13			_x000D_
	LOC100128126	CHRNB2		SCAF8						C5orf51	H3C10			_x000D_
	LOC100128196	CD164L2		DDX11						C6orf136	H2AC14			_x000D_
	LOC100128252	C20orf166		GMIP						C6orf62	H2BC14			_x000D_
	LOC100128266	TMEM194B		TTC28						C6orf89	H4C11			_x000D_
	LOC100128288	HOXA7		TRIM35						C7orf25	H2BC15			_x000D_
	LOC100128353	NOVA2		CHD7						C7orf26	H2AC16			_x000D_
	LOC100128410	HEXDC		SCAF11						C7orf50	H1-5			_x000D_
	LOC100128440	RNF180		SOCS6						C8orf33	H3C11			_x000D_
	LOC100128505	C1QTNF9B-AS1		CNTRL						C8orf48	H4C13			_x000D_
	LOC100128510	PNPLA7		CEP170B						C8orf58	H3C12			_x000D_
	LOC100128627	PAK3		CEP41						C8orf76	H2AC17			_x000D_
	LOC100128689	CCDC120		NLE1						C9orf116	H2BC17			_x000D_
	LOC100128731	FOXD4		TRMT61B						C9orf16	ZSCAN16-AS1			_x000D_
	LOC100128771	OOEP		SLC17A5						C9orf40	ZKSCAN8			_x000D_
	LOC100128805	PRDM16		NFKBIL1						C9orf64	ZSCAN31			_x000D_
	LOC100128892	KIAA1432		YBEY						C9orf78	ZSCAN12			_x000D_
	LOC100128899	TMEM171		ELAC1						C9orf85	ZSCAN23			_x000D_
	LOC100128918	CTAGE15		TBC1D8						CAB39	RN7SL471P			_x000D_
	LOC100128936	TAS1R1		LENG8						CAB39L	POLR1H			_x000D_
	LOC100128975	CEACAM21		KNOP1						CABIN1	AL662795.2			_x000D_
	LOC100128994	TBX1		SMCO4						CABLES1	HCG18			_x000D_
	LOC100129028	F7		VWA5A						CABYR	TCF19			_x000D_
	LOC100129034	LOC101060714		OTUD3						CACHD1	SNORA38			_x000D_
	LOC100129086	ODF4		SMIM13						CACYBP	LY6G5B			_x000D_
	LOC100129094	SP140		MTHFSD						CAD	VARS1			_x000D_
	LOC100129118	C3orf72		RC3H1						CALCOCO1	SNHG32			_x000D_
	LOC100129141	SLC6A18		LRRC8C						CALCOCO2	C2			_x000D_
	LOC100129158	LOC100996747		MAP2K7						CALD1	NELFE			_x000D_
	LOC100129186	EFCC1		PCED1B						CALHM2	DXO			_x000D_
	LOC100129201	ENTPD8		AGFG1						CALM1	C4B			_x000D_
	LOC100129211	TCTEX1D4		TAF1						CALR	TNXB			_x000D_
	LOC100129237	C7orf73		CRYBG3						CALU	SYNGAP1			_x000D_
	LOC100129269	TSSK3		IRF2BPL						CAMK1	UQCC2			_x000D_
	LOC100129297	DLL3		SREBF2						CAMK2D	SMIM29			_x000D_
	LOC100129362	NAT8L		ALYREF						CAMK2G	RPS10-NUDT3			_x000D_
	LOC100129379	CYP4F2		METTL16						CAMK2N1	ILRUN			_x000D_
	LOC100129424	VIPR1		CREBL2						CAMKK2	ILRUN-AS1			_x000D_
	LOC100129502	AMER3		CD302						CAMLG	CMTR1			_x000D_
	LOC100129522	NKD1		HSF1						CAMSAP1	MDFI			_x000D_
	LOC100129539	HDGFRP2		OAS3						CAND1	AL365205.1			_x000D_
	LOC100129543	CLDN19		AIFM2						CANT1	C6orf132			_x000D_
	LOC100129550	TCF15		MLXIP						CANX	PRPH2			_x000D_
	LOC100129552	GRIN1		USP32						CAP1	BICRAL			_x000D_
	LOC100129553	C16orf92		CCDC144A						CAP2	CYP39A1			_x000D_
	LOC100129566	TH		KREMEN1						CAPG	MMUT			_x000D_
	LOC100129585	SAA1		GFER						CAPN1	TRAM2-AS1			_x000D_
	LOC100129599	LCE2B		SMPD2						CAPN2	AL109918.1			_x000D_
	LOC100129608	IRX5		DYRK1B						CAPN5	7SK			_x000D_
	LOC100129650	IL17RE		LIMCH1						CAPN7	CILK1			_x000D_
	LOC100129657	LOC377711		PYROXD1						CAPNS1	BMP5			_x000D_
	LOC100129668	C9orf163		STX17						CAPRIN1	COL21A1			_x000D_
	LOC100129673	MGAT5B		ARHGAP29						CAPRIN2	LINC00680			_x000D_
	LOC100129685	PLEKHG6		SMURF2						CAPZA2	SDHAF4			_x000D_
	LOC100129697	LPPR3		ZNF862						CAPZB	KHDC1			_x000D_
	LOC100129742	LRRC34		CASKIN2						CARD10	CGAS			_x000D_
	LOC100129758	CCDC116		TXNDC16						CARHSP1	HTR1B			_x000D_
	LOC100129759	HMX1		TMEM104						CARM1	TENT5A			_x000D_
	LOC100129781	TMIGD2		SOWAHC						CARS2	DOP1A			_x000D_
	LOC100129828	STRA6		ZNF251						CASC3	PRSS35			_x000D_
	LOC100129866	CTAG1A		TEP1						CASK	CEP162			_x000D_
	LOC100129890	AMN		CACTIN						CASP2	BACH2			_x000D_
	LOC100129902	GNAO1		APOL3						CASP3	GPR63			_x000D_
	LOC100129952	CYP2D6		PDCD11						CASP4	CRYBG1			_x000D_
	LOC100129958	SLC22A15		GLCCI1						CASP6	MTRES1			_x000D_
	LOC100129982	USH1G		SIKE1						CASP7	AFG1L			_x000D_
	LOC100130003	TUBA3E		FRA10AC1						CASP9	ARMC2			_x000D_
	LOC100130053	C7orf55-LUC7L2		PPP6R3						CAST	CEP57L1			_x000D_
	LOC100130070	TMEM150C		EHHADH						CAV1	AK9			_x000D_
	LOC100130092	THRB		CAMTA2						CAV2	MFSD4B			_x000D_
	LOC100130154	AMPD3		TECPR2						CBFA2T2	TRAF3IP2-AS1			_x000D_
	LOC100130168	FBXO27		TOR2A						CBFB	COL10A1			_x000D_
	LOC100130178	SLC2A4		ZSCAN26						CBL	CALHM5			_x000D_
	LOC100130179	NANOS1		MXD3						CBLB	ZUP1			_x000D_
	LOC100130190	SLC18A3		COL4A5						CBLL1	FAM162B			_x000D_
	LOC100130291	KCNJ11		LRIG3						CBLN3	AL450405.1			_x000D_
	LOC100130308	SPTBN4		MRPS31P5						CBR1	PLN			_x000D_
	LOC100130332	STARD8		ZNF512B						CBR3	TBC1D32			_x000D_
	LOC100130445	ANK1		SAMD9L						CBR4	Z99129.4			_x000D_
	LOC100130446	MBLAC1		TRIM59						CBS	LAMA2			_x000D_
	LOC100130476	CDH23		SLC35G2						CBWD5	CCN2			_x000D_
	LOC100130506	TMEM132E		ZNF853						CBX1	EYA4			_x000D_
	LOC100130511	PDCD1		MID2						CBX3	TCF21			_x000D_
	LOC100130516	ETV3L		GFRA1						CBX4	SLC2A12			_x000D_
	LOC100130550	VSX1		SWI5						CBX5	AL590617.2			_x000D_
	LOC100130553	PARD6G-AS1		FCHO2						CBX6	ADGRG6			_x000D_
	LOC100130561	PABPC1L2A		SART3						CBY1	FBXO30-DT			_x000D_
	LOC100130562	ZNF177		COPS2						CC2D1B	SAMD5			_x000D_
	LOC100130598	ASPDH		HYPK						CC2D2A	LATS1			_x000D_
	LOC100130624	FOXI2		SUMO1						CCDC102A	ULBP3			_x000D_
	LOC100130633	CHRDL2		AMPD2						CCDC106	ARMT1			_x000D_
	LOC100130701	CX3CL1		SUPT20H						CCDC107	AL590867.2			_x000D_
	LOC100130707	ADIPOQ		SLC39A8						CCDC112	TIAM2			_x000D_
	LOC100130715	FAM188B		ANXA3						CCDC115	MAP3K4-AS1			_x000D_
	LOC100130764	ZDHHC14		CAPN10						CCDC117	RAMACL			_x000D_
	LOC100130775	HIST3H3		TMEM256						CCDC12	CEP43			_x000D_
	LOC100130818	SLC25A52		ZNF641						CCDC124	AFDN			_x000D_
	LOC100130835	C9orf169		EEA1						CCDC127	LINC01615			_x000D_
	LOC100130856	CXCR3		SH3BP2						CCDC130	ERMARD			_x000D_
	LOC100130886	KRTAP5-7		LRIF1						CCDC14	DNAAF5			_x000D_
	LOC100130892	GUCY2D		SLC12A6						CCDC22	ZFAND2A-DT			_x000D_
	LOC100130919	GPHB5		NACAD						CCDC24	PSMG3-AS1			_x000D_
	LOC100130932	KRTAP10-5		C6orf226						CCDC25	MRM2			_x000D_
	LOC100130943	PTH2		IFIH1						CCDC28A	ZNF815P			_x000D_
	LOC100130980	PRLH		SMC6						CCDC28B	SNORA80D			_x000D_
	LOC100131096	SNORA5B		ATG16L2						CCDC34	ZNF316			_x000D_
	LOC100131166	TMEM86A		BTRC						CCDC43	CCZ1B			_x000D_
	LOC100131196	ERBB2IP		PIKFYVE						CCDC47	UMAD1			_x000D_
	LOC100131205	CELSR2		FOXP4						CCDC50	MEOX2			_x000D_
	LOC100131261	ERO1LB		GSK3A						CCDC51	CRPPA			_x000D_
	LOC100131294	ATHL1		PAG1						CCDC59	POLR1F			_x000D_
	LOC100131336	MIR636		HOXB2						CCDC6	EEF1A1P6			_x000D_
	LOC100131360	FAM212B		DDX60L						CCDC66	SNHG26			_x000D_
	LOC100131387	PCNXL4		ENKD1						CCDC71	NUP42			_x000D_
	LOC100131526	WNT3A		PPARA						CCDC74A	GSDME			_x000D_
	LOC100131531	LY6D		ZC3H6						CCDC77	HOTAIRM1			_x000D_
	LOC100131541	CYP2C18		EPHB3						CCDC80	HOXA3			_x000D_
	LOC100131609	TNFSF9		GPR68						CCDC85B	HOXA-AS2			_x000D_
	LOC100131672	DLX4		TPK1						CCDC86	MTURN			_x000D_
	LOC100131713	PAR-SN		DNMBP						CCDC90B	GARS1-DT			_x000D_
	LOC100131718	NOS1		PATZ1						CCDC91	GARS1			_x000D_
	LOC100131727	ZNF169		MCAM						CCDC92	INMT			_x000D_
	LOC100131735	SIGLEC8		NREP						CCDC93	MINDY4			_x000D_
	LOC100131737	HOXA11		NPRL3						CCDC97	PDE1C			_x000D_
	LOC100131785	ZNF837		MIS18A						CCL2	BMPER			_x000D_
	LOC100131787	LINC00482		PMAIP1						CCM2	TBX20			_x000D_
	LOC100131801	TBXA2R		POLR1A						CCNB1	AC018647.2			_x000D_
	LOC100131810	SMCR7		PCGF5						CCNB1IP1	AC018647.1			_x000D_
	LOC100131859	SLC37A2		HDAC10						CCNB2	SEPTIN7			_x000D_
	LOC100131866	LOC101060521		ERAP1						CCNC	AMPH			_x000D_
	LOC100131905	GDF5		ZNF219						CCND1	YAE1			_x000D_
	LOC100131940	LMTK3		FUZ						CCND3	SUGCT			_x000D_
	LOC100131971	FZD9		BRAP						CCNDBP1	AC010132.3			_x000D_
	LOC100131980	MAPK8IP2		SPOPL						CCNE1	HECW1			_x000D_
	LOC100131989	BEST2		VANGL1						CCNG1	MYL7			_x000D_
	LOC100132032	NRXN2		TMEM120B						CCNG2	GCK			_x000D_
	LOC100132037	TVP23A		SAMD11						CCNH	H2AZ2			_x000D_
	LOC100132060	TMEM255B		DMXL1						CCNI	SNHG15			_x000D_
	LOC100132106	CXXC11		HSPA2						CCNK	SEPTIN7P2			_x000D_
	LOC100132139	HES7		ABCB8						CCNL1	C7orf69			_x000D_
	LOC100132199	NPW		CSTF2T						CCNL2	FKBP9P1			_x000D_
	LOC100132213	MROH6		ALG2						CCNT2	ZNF713			_x000D_
	LOC100132247	C11orf35		GHDC						CCNY	NIPSNAP2			_x000D_
	LOC100132289	FCRL6		FDX1						CCNYL1	ZNF736			_x000D_
	LOC100132291	SPRED3		GSKIP						CCPG1	ZNF273			_x000D_
	LOC100132299	SORBS2		KIF3A						CCS	CCT6P3			_x000D_
	LOC100132323	ZNF296		NSRP1						CCT2	SNORA22C			_x000D_
	LOC100132324	MROH5		ZNF346						CCT3	SNORA22			_x000D_
	LOC100132369	ASIC4		STS						CCT4	GS1-124K5.4			_x000D_
	LOC100132391	C16orf11		NCEH1						CCT5	AC006001.4			_x000D_
	LOC100132394	SLC5A10		ACER3						CCT6A	PMS2P4			_x000D_
	LOC100132418	TM6SF2		RAD9A						CCT7	SBDSP1			_x000D_
	LOC100132425	KRTAP5-2		HAPLN3						CCT8	AC211476.4			_x000D_
	LOC100132457	MASP2		FZR1						CD151	PMS2P6			_x000D_
	LOC100132488	TMEM105		TMEM198						CD276	GTF2IP4			_x000D_
	LOC100132499	FAM213B		MAP3K14						CD2AP	BUD23			_x000D_
	LOC100132510	SLC34A3		HSD17B8						CD2BP2	CASTOR2			_x000D_
	LOC100132528	OSGIN1		VPS13B						CD320	RCC1L			_x000D_
	LOC100132535	PPP1R3G		LTN1						CD44	PMS2P3			_x000D_
	LOC100132547	MPPED1		PPP1R3D						CD46	SRRM3			_x000D_
	LOC100132564	NARR		CREM						CD47	APTR			_x000D_
	LOC100132585	PSG7		LIG4						CD58	MAGI2-AS3			_x000D_
	LOC100132593	GATSL1		CITED4						CD59	HGF			_x000D_
	LOC100132658	C16orf54		WDR35						CD63	CACNA2D1			_x000D_
	LOC100132673	SOX14		PDIK1L						CD68	SEMA3D			_x000D_
	LOC100132715	NAT6		CDK14						CD81	ELAPOR2			_x000D_
	LOC100132717	AQP12A		USP31						CD82	MTERF1			_x000D_
	LOC100132727	KRTAP3-2		MAP9						CD9	VPS50			_x000D_
	LOC100132742	PRB2		ISYNA1						CD99	PDK4			_x000D_
	LOC100132761	NTN3		ANP32E						CD99L2	SEM1			_x000D_
	LOC100132767	MRGPRE		FAIM2						CDAN1	SDHAF3			_x000D_
	LOC100132795	AMELY		TCOF1						CDC123	OR7E38P			_x000D_
	LOC100132797	KRTAP12-1		FAM126A						CDC14B	LMTK2			_x000D_
	LOC100132805	C2CD4D		TASP1						CDC16	RPS3AP26			_x000D_
	LOC100132863	SSTR4		TTC33						CDC23	ATP5MF-PTCD1			_x000D_
	LOC100132901	MRGPRD		ESF1						CDC25B	ATP5MF			_x000D_
	LOC100132918	WFDC12		TGS1						CDC26	MAP11			_x000D_
	LOC100132992	NUTM2A		L3HYPDH						CDC34	CASTOR3			_x000D_
	LOC100133008	DNAJB13		CAMKMT						CDC37	PMS2P1			_x000D_
	LOC100133012	NEU2		ESCO1						CDC40	STAG3L5P			_x000D_
	LOC100133019	IGJ		SNTB1						CDC42	STAG3L5P-PVRIG2P-PILRB			_x000D_
	LOC100133055	SEPT7		ZSCAN9						CDC42BPA	IFT22			_x000D_
	LOC100133076	CPLX2		CEP290						CDC42BPB	RASA4B			_x000D_
	LOC100133163	DPPA4		SDK1						CDC42EP1	UPK3BL1			_x000D_
	LOC100133177	OAS2		ZSCAN25						CDC42EP2	AC105052.3			_x000D_
	LOC100133185	ENPP4		FAM120C						CDC42EP3	EIF4BP6			_x000D_
	LOC100133233	PLEKHB1		IL15						CDC42EP4	PRKAR2B			_x000D_
	LOC100133273	OSBP2		ANKS6						CDC42EP5	AC002467.1			_x000D_
	LOC100133298	LOC100505991		TUBB2B						CDC42SE2	LRRN3			_x000D_
	LOC100133328	AAED1		CPSF6						CDC5L	BMT2			_x000D_
	LOC100133372	LPAR5		ATAT1						CDC7	SMIM30			_x000D_
	LOC100133390	MIR22		MZT1						CDCA4	WNT2			_x000D_
	LOC100133465	SWSAP1		RLIM						CDCA5	KCND2			_x000D_
	LOC100133473	METTL10		KIAA0930						CDCA7	WASL-DT			_x000D_
	LOC100133477	IRGC		POGLUT1						CDCA7L	AC010655.4			_x000D_
	LOC100133478	LILRA2		HOMER1						CDH13	AC090114.2			_x000D_
	LOC100133489	TREML2		MLLT1						CDH2	AC090114.3			_x000D_
	LOC100133516	MIR4800		TRIM14						CDIPT	AC108010.1			_x000D_
	LOC100133517	TMEM38A		LPCAT2						CDK10	AC018638.4			_x000D_
	LOC100133578	HTR5A		ARHGAP35						CDK2	AC018638.2			_x000D_
	LOC100133600	TNNT1		ABLIM3						CDK2AP1	AC018638.5			_x000D_
	LOC100133607	SLC2A14		SPRYD7						CDK2AP2	PLXNA4			_x000D_
	LOC100133609	TMEM121		LPAR2						CDK4	CYREN			_x000D_
	LOC100133627	AVPR1A		MCUR1						CDK5	STMP1			_x000D_
	LOC100133649	BTBD17		MAU2						CDK5RAP1	FAM180A			_x000D_
	LOC100133692	APOBEC3H		LIPG						CDK5RAP2	CHRM2			_x000D_
	LOC100133697	ERN2		IRF2BP1						CDK5RAP3	AC090498.1			_x000D_
	LOC100133772	MAP3K9		MAP3K5						CDK6	FMC1			_x000D_
	LOC100133795	WNT3		ZNF354A						CDK7	FMC1-LUC7L2			_x000D_
	LOC100133800	GHSR		MATN3						CDK8	KDM7A			_x000D_
	LOC100133803	KIRREL		ATG14						CDK9	DENND11			_x000D_
	LOC100133812	C10orf95		ROBO1						CDKL3	EPHB6			_x000D_
	LOC100133823	B4GALNT3		DSG2						CDKN1A	AC093673.1			_x000D_
	LOC100133836	CHRNB4		ZNRF3						CDKN1B	TCAF1P1			_x000D_
	LOC100133866	WFIKKN1		OGFOD3						CDKN2AIP	TCAF1			_x000D_
	LOC100133876	KLRG2		KLHL15						CDKN2AIPNL	ARHGEF35			_x000D_
	LOC100133888	HOXD8		ASTE1						CDKN2D	ARHGEF35-AS1			_x000D_
	LOC100133923	AGAP2		SPATA2						CDKN3	OR2A1-AS1			_x000D_
	LOC100133931	TCEAL6		TMEM200B						CDR2	RNY1			_x000D_
	LOC100133950	TGM5		TRMT2A						CDR2L	AC004890.2			_x000D_
	LOC100133999	LIPT2		NIPAL3						CDS2	ZNF767P			_x000D_
	LOC100134053	LRFN1		CNP						CDV3	GIMAP2			_x000D_
	LOC100134073	EXOC3L2		MOB1A						CDYL	TMEM176B			_x000D_
	LOC100134083	GIPR		TET2						CEBPB	KCNH2			_x000D_
	LOC100134108	USP6		DCAF5						CEBPD	PAXIP1-AS2			_x000D_
	LOC100134134	EOMES		HS2ST1						CEBPG	AC009403.1			_x000D_
	LOC100134159	AGAP10		PRIM2						CEBPZ	LINC01006			_x000D_
	LOC100134182	SLC16A11		BOC						CENPB	NOM1			_x000D_
	LOC100134188	LAMC2		XIAP						CENPE	DYNC2I1			_x000D_
	LOC100134189	C20orf166-AS1		AMOTL1						CENPJ	ZNF596			_x000D_
	LOC100134209	ASB16		WDHD1						CENPK	AC100810.1			_x000D_
	LOC100134259	PNPLA5		MRM1						CENPL	AC016065.1			_x000D_
	LOC100134273	MYOZ3		MICAL3						CENPM	PRAG1			_x000D_
	LOC100134304	HOXC5		NFYA						CENPN	GATA4			_x000D_
	LOC100134364	LOC100233156		SORBS1						CENPO	AC145124.1			_x000D_
	LOC100134393	GALR3		PITPNC1						CENPT	PDGFRL			_x000D_
	LOC100134407	TSPO2		BTN2A2						CENPV	CSGALNACT1			_x000D_
	LOC100134424	TMEM89		PELI3						CEP135	CCAR2			_x000D_
	LOC100134504	MYCL1		MIER3						CEP152	ESCO2			_x000D_
	LOC100134537	PRSS57		TBC1D24						CEP164	AC108449.2			_x000D_
	LOC100134584	KRT32		PRDM2						CEP192	SARAF			_x000D_
	LOC100134648	ADRA2B		ANXA2R						CEP350	TUBBP1			_x000D_
	LOC100134868	GPBAR1		ERI2						CEP63	AC090204.1			_x000D_
	LOC100190938	LOC101060409		S1PR2						CEP78	LSM12P1			_x000D_
	LOC100190986	LOC100132832		ZNF606						CEPT1	PLPBP			_x000D_
	LOC100192378	SCXA		ARMC9						CERCAM	ADGRA2			_x000D_
	LOC113386	KCNA7		SLC24A1						CERK	PLPP5			_x000D_
	LOC123688	C17orf67		SREK1IP1						CES2	NSD3			_x000D_
	LOC124512	PAPPA2		XRCC4						CETN2	TCIM			_x000D_
	LOC127295	FAM181A		VWA8						CETN3	GPAT4			_x000D_
	LOC128192	GAGE10		SLC2A13						CFDP1	POMK			_x000D_
	LOC130773	GPR27		MYBL1						CFH	SPIDR			_x000D_
	LOC134997	LOC100505519		SSC5D						CFL1	AC064807.1			_x000D_
	LOC136143	C3orf17		ZBTB41						CFL2	PENK			_x000D_
	LOC143543	CST4		ZNF616						CFLAR	BPNT2			_x000D_
	LOC144438	ACE		ZFP41						CGGBP1	TOX			_x000D_
	LOC145853	KIAA1524		CNEP1R1						CGRRF1	AC084082.1			_x000D_
	LOC146177	SMIM11		LCAT						CHCHD1	NCOA2			_x000D_
	LOC146517	DNAAF1		SOGA1						CHCHD10	MSC-AS1			_x000D_
	LOC147804	TMEM82		KRI1						CHCHD2	TRPA1			_x000D_
	LOC148430	DUSP15		TIMM17A						CHCHD3	AC022826.2			_x000D_
	LOC148915	PAK6		BHLHE40						CHCHD4	ELOC			_x000D_
	LOC149448	DAND5		RMDN1						CHCHD5	CRISPLD1			_x000D_
	LOC151162	LRRC3		XXYLT1						CHCHD6	ZNF704			_x000D_
	LOC151579	NXNL1		AJUBA						CHCHD7	RBIS			_x000D_
	LOC153561	LRP5L		FAM222B						CHD1	AF117829.1			_x000D_
	LOC158345	SERINC4		EDN1						CHD1L	C8orf88			_x000D_
	LOC196752	C5orf56		TRNAU1AP						CHD3	PIP4P2			_x000D_
	LOC200030	C2orf62		ABHD17C						CHD4	OTUD6B-AS1			_x000D_
	LOC201725	IGSF9B		R3HCC1L						CHD6	RUNX1T1			_x000D_
	LOC202227	GALNT9		EMC2						CHD8	CIBAR1			_x000D_
	LOC202781	NANOS2		ANAPC15						CHD9	VIRMA			_x000D_
	LOC203547	BATF3		VPS53						CHEK1	CCNE2			_x000D_
	LOC220433	NLRP3		PLBD2						CHEK2	NDUFAF6			_x000D_
	LOC220686	PITX3		RBMXL1						CHERP	GDF6			_x000D_
	LOC221710	LBX2		HOMEZ						CHFR	MTERF3			_x000D_
	LOC23117	IL17F		FBXL19						CHIC2	RIDA			_x000D_
	LOC255167	C17orf82		METTL25						CHKA	OSR2			_x000D_
	LOC255783	CXorf49		HOXA5						CHKB	BAALC-AS1			_x000D_
	LOC257396	KRTAP10-11		PPIP5K2						CHM	ZFPM2			_x000D_
	LOC25845	CCDC132		ZBTB21						CHMP1A	ZFPM2-AS1			_x000D_
	LOC283267	MCCD1		PARPBP						CHMP1B	PKHD1L1			_x000D_
	LOC283412	KRTAP3-1		SHISA3						CHMP2A	COLEC10			_x000D_
	LOC283788	FOXD4L3		DOCK4						CHMP2B	RN7SL396P			_x000D_
	LOC283932	GPX6		AGAP4						CHMP4A	DEPTOR			_x000D_
	LOC283953	BCL2		PRX						CHMP4B	AC091563.1			_x000D_
	LOC284023	CCDC157		CD74						CHMP5	MTBP			_x000D_
	LOC284167	KRT40		KDM4C						CHMP6	TBC1D31			_x000D_
	LOC284230	MAP1LC3C		SNN						CHMP7	NTAQ1			_x000D_
	LOC284393	NUTM2F		BCR						CHORDC1	WASHC5			_x000D_
	LOC284821	TNFRSF13B		IGHMBP2						CHPF	LRATD2			_x000D_
	LOC284988	AMELX		FAM204A						CHPF2	PVT1			_x000D_
	LOC285053	DEFB4A		METTL22						CHPT1	CYRIB			_x000D_
	LOC285074	TP73		CEP170						CHRAC1	CCN4			_x000D_
	LOC285176	KRT9		EFNA5						CHRNB1	AC103706.1			_x000D_
	LOC285550	RNASE13		KMT2E						CHST12	AC100803.3			_x000D_
	LOC285741	PROZ		BACH1						CHST14	GPR20			_x000D_
	LOC285900	KRTAP9-3		MPV17L2						CHST3	TSNARE1			_x000D_
	LOC285943	KCNK16		FAM50B						CHST7	GLI4			_x000D_
	LOC286016	PF4V1		FGD4						CHSY1	MINCR			_x000D_
	LOC286157	CTCFL		GID4						CHTF18	NAPRT			_x000D_
	LOC286444	GPAT2		USP54						CHUK	PYCR3			_x000D_
	LOC286512	GAL3ST2		ZCCHC10						CHURC1	GFUS			_x000D_
	LOC338758	UTF1		TAF5L						CIAO1	HGH1			_x000D_
	LOC338870	NCR1		HES4						CIAPIN1	MROH1			_x000D_
	LOC339290	OR52B2		CES4A						CIB1	SCX			_x000D_
	LOC339352	OR2T3		DHX57						CIC	ZNF34			_x000D_
	LOC339804	OR2T2		SENP8						CINP	WASHC1			_x000D_
	LOC339843	OR10G7		LIF						CIR1	PUM3			_x000D_
	LOC339970	OR2T29		WDR11						CIRBP	PLPP6			_x000D_
	LOC340260	SH2D6		MTF2						CISD1	RIC1			_x000D_
	LOC341315	NPAS1		DIS3						CISD2	IL33			_x000D_
	LOC341457	MIR4746		CDK11A						CITED2	DMAC1			_x000D_
	LOC341784	PSG1		KAT6A						CKAP2	RN7SL5P			_x000D_
	LOC341965	RNU86		MIB1						CKAP4	TYRP1			_x000D_
	LOC343184	KRTAP5-1		PEX3						CKAP5	CCDC171			_x000D_
	LOC344595	KRTAP12-3		ARHGAP32						CKB	HACD4			_x000D_
	LOC345041	DEFB115		TLE3						CKLF	MIR31HG			_x000D_
	LOC345645	KRTAP23-1		PPIL4						CKS1B	RN7SL151P			_x000D_
	LOC346085	SLCO2B1		DCLRE1B						CKS2	SMIM27			_x000D_
	LOC346887	PTPN6		PSMB9						CLASP1	AQP3			_x000D_
	LOC347292	MESDC2		AFAP1L2						CLASP2	AL162231.1			_x000D_
	LOC347376	FAM129A		CDIP1						CLCC1	AL162231.2			_x000D_
	LOC347544	PYCRL		GEMIN7						CLCF1	RMRP			_x000D_
	LOC374395	FAM208B		MPG						CLCN3	EBLN3P			_x000D_
	LOC375295	FAM84B		NABP1						CLCN6	FRG1HP			_x000D_
	LOC387703	CXCL16		KDM4A						CLCN7	CBWD6			_x000D_
	LOC387753	TNFRSF10C		OXNAD1						CLDN11	CNTNAP3B			_x000D_
	LOC387763	CHDH		GTF3C4						CLDN12	ZNF658			_x000D_
	LOC387791	APOPT1		CDC25A						CLDN15	CEMIP2			_x000D_
	LOC387820	IGFBPL1		POU2F1						CLDND1	CARNMT1			_x000D_
	LOC387825	USH1C		KATNBL1						CLEC16A	AL354920.1			_x000D_
	LOC387841	CD3EAP		CEP112						CLIC1	KIF27			_x000D_
	LOC387867	LTB		HELZ2						CLIC4	TUT7			_x000D_
	LOC387882	FETUB		GPRIN1						CLINT1	CTSL			_x000D_
	LOC387930	SLAMF8		TMEM201						CLIP1	ROR2			_x000D_
	LOC387934	ASB10		SCAI						CLIP2	IARS1			_x000D_
	LOC388076	FNDC9		ADAMTS5						CLIP3	SNORA84			_x000D_
	LOC388275	CACNA1G		LEPR						CLIP4	CENPP			_x000D_
	LOC388339	GLTSCR1L		PML						CLK1	OGN			_x000D_
	LOC388474	DDX26B		ATAD2B						CLK2	ASPN			_x000D_
	LOC388524	ATAD3C		PRDM15						CLK3	ECM2			_x000D_
	LOC388532	LOC101060226		MCC						CLK4	CARD19			_x000D_
	LOC388556	FUT3		ZNF182						CLN3	BARX1			_x000D_
	LOC388564	RAB37		SOX12						CLN5	MFSD14B			_x000D_
	LOC388621	KCNQ2		HOXB4						CLN8	AOPEP			_x000D_
	LOC388654	ISPD		SGTB						CLNS1A	LINC00476			_x000D_
	LOC388681	FAIM3		PERP						CLOCK	EIF4BP3			_x000D_
	LOC388707	KISS1R		KXD1						CLP1	PRXL2C			_x000D_
	LOC388720	LRRC26		SLC9B2						CLPP	ZNF782			_x000D_
	LOC388789	CHST4		MAVS						CLPTM1	MFSD14C			_x000D_
	LOC388796	PHOSPHO1		TTI2						CLPTM1L	CTSV			_x000D_
	LOC388969	SPAG1		ORC5						CLPX	TSTD2			_x000D_
	LOC389049	CXorf23		NUFIP1						CLSTN1	TRMO			_x000D_
	LOC389101	LRRC25		DROSHA						CLTA	COL15A1			_x000D_
	LOC389137	ZFP2		MARK2						CLTB	PGAP4			_x000D_
	LOC389141	PARVG		EPB41L3						CLTC	FSD1L			_x000D_
	LOC389168	MIP		LRRC1						CLTCL1	ELP1			_x000D_
	LOC389203	ZNF575		STRBP						CLUAP1	ABITRAM			_x000D_
	LOC389223	F2RL3		EPC2						CMAS	PALM2AKAP2			_x000D_
	LOC389286	SEZ6L		MTHFR						CMBL	ECPAS			_x000D_
	LOC389293	PTPN3		ZNF202						CMC1	TMEM268			_x000D_
	LOC389322	TMEM130		DDHD1						CMIP	B3GNT10			_x000D_
	LOC389342	METTL20		FBXL8						CMPK1	CUTALP			_x000D_
	LOC389386	CTBP1-AS2		EPG5						CMTM3	LHX2			_x000D_
	LOC389404	SSTR3		WNT4						CMTM4	AL162584.1			_x000D_
	LOC389435	FAM208A		ZSCAN22						CMTM6	ZNF79			_x000D_
	LOC389517	FUT6		JAK3						CMTM7	NIBAN2			_x000D_
	LOC389599	APOBEC3A		HAUS3						CNBP	AL157935.2			_x000D_
	LOC389662	SLC6A12		ZNF77						CNDP2	DYNC2I2			_x000D_
	LOC389672	APOBEC3D		PIGL						CNIH4	AL441992.1			_x000D_
	LOC389765	KRTAP19-3		ADAMTS7						CNKSR3	SPOUT1			_x000D_
	LOC389787	ASPG		CDK3						CNN1	KYAT1			_x000D_
	LOC389873	PARK2		ZBTB2						CNN2	MIGA2			_x000D_
	LOC389901	ADRA1D		TSN						CNN3	PTPA			_x000D_
	LOC390183	FRMD1		ERGIC2						CNNM3	LINC01503			_x000D_
	LOC390298	LOC100288142		GPC4						CNOT1	LINC00963			_x000D_
	LOC390345	IGFALS		SMIM8						CNOT10	SPACA9			_x000D_
	LOC390354	FAM83C		COPRS						CNOT2	EEF1A1P5			_x000D_
	LOC390466	ACSM1		TMEM260						CNOT4	SARDH			_x000D_
	LOC390530	CACNG6		RDH13						CNOT6	BRD3OS			_x000D_
	LOC390557	SYNE4		HAUS6						CNOT7	TMEM250			_x000D_
	LOC390671	LAIR2		ZNF350						CNOT8	ENTR1			_x000D_
	LOC390876	CCDC36		RAVER2						CNPY2	SNORA17B			_x000D_
	LOC390940	RNF128		ZNF267						CNPY3	PTGDS			_x000D_
	LOC391019	RGPD4		FKBP7						CNPY4	LCNL1			_x000D_
	LOC391045	PRAMEF1		TMEM237						CNRIP1	PAXX			_x000D_
	LOC391075	TPSG1		ZNF48						CNTNAP1	ABCA2			_x000D_
	LOC391126	TBATA		RASL10B						COASY	DPH7			_x000D_
	LOC391334	C19orf35		ALKBH8						COBLL1	ARRDC1-AS1			_x000D_
	LOC391370	ALK		APBA2						COG1	TASOR2			_x000D_
	LOC391532	PKLR		PRR14L						COG2	FBH1			_x000D_
	LOC391578	LDLRAD1		ZNF335						COG3	ATP5F1C			_x000D_
	LOC391656	GDF7		MECOM						COG4	CCDC3			_x000D_
	LOC391777	KCNK7		CDH24						COG5	AL157392.3			_x000D_
	LOC391811	TREX2		BLOC1S3						COG6	ITGA8			_x000D_
	LOC391833	RTL1		SLC4A3						COG7	MINDY3			_x000D_
	LOC392285	CSF3R		FAM185A						COG8	HACD1			_x000D_
	LOC392437	TAS1R3		SRSF1						COIL	MIR1915HG			_x000D_
	LOC392787	PHKG1		UBASH3B						COL11A1	COMMD3-BMI1			_x000D_
	LOC399748	SYBU		NDUFAF7						COL13A1	MKX			_x000D_
	LOC399804	MIR4680		ORC6						COL16A1	WAC-AS1			_x000D_
	LOC399900	VWA7		NAA40						COL18A1	SVIL-AS1			_x000D_
	LOC399942	MC2R		NHEJ1						COL1A1	JCAD			_x000D_
	LOC399959	SCAMP5		CHAF1A						COL1A2	ZEB1			_x000D_
	LOC399988	SH2D3C		BBS12						COL4A1	CCDC7			_x000D_
	LOC400013	IL12RB1		NAA38						COL4A2	NAMPTP1			_x000D_
	LOC400027	TMEM144		FMNL1						COL5A1	HSD17B7P2			_x000D_
	LOC400061	TMEM150B		NCAM1						COL5A2	LINC00839			_x000D_
	LOC400446	PTCH2		FOXO1						COL6A1	ZNF37BP			_x000D_
	LOC400455	LOC100287515		VTI1A						COL6A2	ZNF487			_x000D_
	LOC400464	GGT1		ACTR5						COL7A1	ZNF485			_x000D_
	LOC400506	ADPRHL1		MSANTD3						COL8A1	DEPP1			_x000D_
	LOC400558	CYP4A11		SEMA3B						COMMD1	MARCHF8			_x000D_
	LOC400657	LHX5		SLC45A3						COMMD10	ZFAND4			_x000D_
	LOC400713	NPC1L1		EME1						COMMD2	WASHC2C			_x000D_
	LOC400721	C22orf24		ABCD1						COMMD3	PARGP1			_x000D_
	LOC400890	SLC30A2		FAM171A2						COMMD4	ANXA8L1			_x000D_
	LOC400948	LENEP		RALGPS2						COMMD5	AL356056.2			_x000D_
	LOC400963	KPNA7		CCDC58						COMMD6	AL356056.1			_x000D_
	LOC400986	PRCD		DTD2						COMMD7	RHEBP2			_x000D_
	LOC401010	CLEC2L		ZNF608						COMMD8	FO681492.1			_x000D_
	LOC401019	LTK		SH3BP1						COMMD9	WASHC2A			_x000D_
	LOC401076	KIR2DS4		CROCC						COMT	PRKG1			_x000D_
	LOC401098	NPB		EXOC8						COMTD1	IPMK			_x000D_
	LOC401115	KRTAP17-1		ARVCF						COPA	FAM13C			_x000D_
	LOC401152	INS		LACC1						COPB1	TMEM26			_x000D_
	LOC401206	LOC653501		LCA5						COPB2	LINC01515			_x000D_
	LOC401218	AGER		CHIC1						COPE	DNA2			_x000D_
	LOC401238	ARTN		DHRS12						COPG2	TET1			_x000D_
	LOC401357	KIR2DL2		DNTTIP2						COPS3	COX20P1			_x000D_
	LOC401397	ISM2		TRMT1L						COPS4	KIFBP			_x000D_
	LOC401537	KRTAP5-11		RNF2						COPS5	MACROH2A2			_x000D_
	LOC401640	SIM2		RAD18						COPS6	VSIR			_x000D_
	LOC401676	RHCE		ZNF300						COPS7A	PPP3CB-AS1			_x000D_
	LOC401847	ESR2		NEK4						COPS7B	AC022400.6			_x000D_
	LOC402057	KRTAP12-2		GINM1						COPS8	ZNF503-AS2			_x000D_
	LOC402112	CAMSAP3		PLA2G12A						COPZ1	NUTM2B-AS1			_x000D_
	LOC402175	MFSD2B		GULP1						COPZ2	SFTPD			_x000D_
	LOC402221	WNT9B		TTC30A						COQ10A	PLAC9			_x000D_
	LOC402251	GPR150		CCP110						COQ10B	PRXL2A			_x000D_
	LOC402560	HTR3D		DNAJC16						COQ2	RPS3AP5			_x000D_
	LOC402644	MYEOV2		EFCAB2						COQ3	WAPL			_x000D_
	LOC402694	LST1		LRP12						COQ5	SHLD2			_x000D_
	LOC407835	TMEM88B		BLOC1S5						COQ6	NUTM2A-AS1			_x000D_
	LOC439953	KRTAP12-4		POMZP3						COQ9	HTR7			_x000D_
	LOC440027	LCE3A		DOCK9						CORO1B	SRP9P1			_x000D_
	LOC440043	POTEE		RAB33B						CORO1C	MARCHF5			_x000D_
	LOC440055	LAMA3		STK32C						CORO7	HHEX			_x000D_
	LOC440063	DEPDC1B		CARD9						COTL1	PLCE1			_x000D_
	LOC440093	DPF1		CLHC1						COX10	ENTPD1			_x000D_
	LOC440145	SHOX		ZNF181						COX15	ENTPD1-AS1			_x000D_
	LOC440160	KLK9		LIMD1						COX17	RPL13AP5			_x000D_
	LOC440280	PAX3		LRRN2						COX19	NKX2-3			_x000D_
	LOC440311	KCNG2		CTIF						COX4I1	AL133352.1			_x000D_
	LOC440341	OR51D1		NSUN5P1						COX5A	SLF2			_x000D_
	LOC440345	OR2A2		FAM210A						COX5B	TWNK			_x000D_
	LOC440348	OR4N2		CCDC61						COX6A1	KAZALD1			_x000D_
	LOC440353	OR5H1		GSTCD						COX6B1	OGA			_x000D_
	LOC440354	C9orf9		ZNF222						COX6C	ARMH3			_x000D_
	LOC440359	MIR4745		CIB2						COX7A2	RPARP-AS1			_x000D_
	LOC440487	C2orf81		KLHL17						COX7A2L	MFSD13A			_x000D_
	LOC440498	SLC22A20		LYSMD1						COX7B	BORCS7			_x000D_
	LOC440575	INCA1		TRIM16						COX7C	CNNM2			_x000D_
	LOC440589	FOXB2		KRR1						COX8A	ATP5MD			_x000D_
	LOC440595	SSX6		RABIF						CPA4	STN1			_x000D_
	LOC440704	OR52R1		CD55						CPD	BBIP1			_x000D_
	LOC440731	OR2T4		KIAA0232						CPEB2	AL158212.3			_x000D_
	LOC440733	FAM58BP		EMP2						CPNE1	CCDC186			_x000D_
	LOC440737	OR4X1		ZFP64						CPNE3	SHTN1			_x000D_
	LOC440895	SEBOX		LTBP1						CPOX	DENND10			_x000D_
	LOC440926	RAB19		CAAP1						CPSF1	RPL21P16			_x000D_
	LOC440927	FAM136BP		BRF1						CPSF2	PLPP4			_x000D_
	LOC440928	LCE3B		LDLRAD3						CPSF3	FGFR2			_x000D_
	LOC440957	C17orf89		FBXL4						CPSF4	EEF1AKMT2			_x000D_
	LOC440991	LOC100509484		CADM1						CPT1A	ABRAXAS2			_x000D_
	LOC441013	ATP6AP1L		ECHDC3						CPT2	AL731577.2			_x000D_
	LOC441019	LOC100996792		OTUD7B						CRABP2	EDRF1			_x000D_
	LOC441034	SEMA6A		USP28						CRADD	INSYN2A			_x000D_
	LOC441050	MIR4723		HAUS2						CRAT	PGGHG			_x000D_
	LOC441073	HSD17B1		F2RL1						CRBN	B4GALNT4			_x000D_
	LOC441087	CDH6		PLEKHA5						CRCP	MIR210HG			_x000D_
	LOC441089	ANKRD32		KCNK1						CREB1	GATD1			_x000D_
	LOC441131	VIMP		PROSER2						CREB3	AP006621.3			_x000D_
	LOC441154	MTERFD2		CEP19						CREB3L2	PIDD1			_x000D_
	LOC441191	CHMP4C		DCAF17						CREB5	SNORA52			_x000D_
	LOC441241	DOPEY1		GINS1						CREBBP	H19			_x000D_
	LOC441246	LY9		ARID1B						CREBZF	AC132217.1			_x000D_
	LOC441253	LOC101060478		GEMIN2						CREG1	SNORA54			_x000D_
	LOC441377	RTN4RL2		ARHGAP6						CRELD1	CARS1			_x000D_
	LOC441408	SPRR4		CPNE7						CRELD2	TSSC2			_x000D_
	LOC441455	TARSL2		ZNF404						CRIM1	CAVIN3			_x000D_
	LOC441481	SORL1		PTPRJ						CRIP2	DNHD1			_x000D_
	LOC441484	SLN		CASP8						CRIPT	OLFML1			_x000D_
	LOC441506	SLCO4A1		TOR4A						CRISPLD2	DENND2B			_x000D_
	LOC441511	C16orf59		PDGFA						CRK	TMEM9B-AS1			_x000D_
	LOC441642	C9orf172		LTC4S						CRKL	SNORA23			_x000D_
	LOC441763	NPBWR1		AKR1C2						CRLF1	RPL23AP65			_x000D_
	LOC441775	FAM21A		CDKN1C						CRLF3	MTRNR2L8			_x000D_
	LOC441876	BMP2		ANAPC16						CRLS1	IRAG1			_x000D_
	LOC442153	USP27X		KDM5C						CROT	ZBED5-AS1			_x000D_
	LOC442232	SLMO2		SMDT1						CRTAP	AC116533.1			_x000D_
	LOC442454	MLLT4		SLC25A32						CRTC3	NCR3LG1			_x000D_
	LOC442597	HPGD		UCP2						CRY1	AC124798.1			_x000D_
	LOC442609	C2orf15		C6orf120						CRY2	LUZP2			_x000D_
	LOC493869	H2AFV		ORC2						CRYL1	WT1			_x000D_
	LOC550112	TNFSF10		KLF3						CRYZ	WT1-AS			_x000D_
	LOC550643	MIR943		MCCC2						CRYZL1	LINC00294			_x000D_
	LOC552889	LACE1		ZNF205						CS	HIPK3			_x000D_
	LOC554203	PODXL2		KANSL3						CSAD	IFTAP			_x000D_
	LOC554206	TMEM102		IPPK						CSDE1	C11orf96			_x000D_
	LOC613037	SLC2A5		SERPINB9						CSE1L	TP53I11			_x000D_
	LOC641298	DPH3P1		ZNF414						CSK	PRDM11			_x000D_
	LOC641727	ADAT3		SH3RF2						CSNK1A1	MAPK8IP1			_x000D_
	LOC641768	MMP7		TANGO6						CSNK1D	AC135977.1			_x000D_
	LOC641798	NKAIN4		SDE2						CSNK1E	SELENOH			_x000D_
	LOC641814	TSPAN1		CLMP						CSNK1G1	FAM111B			_x000D_
	LOC641844	EEF1A2		RAC3						CSNK1G2	FAM111A-DT			_x000D_
	LOC641848	ARSE		UACA						CSNK1G3	FABP5P7			_x000D_
	LOC641992	LOC101060545		ZNF771						CSNK2A1	TKFC			_x000D_
	LOC642017	CXCL2		GANC						CSNK2A2	AP003108.2			_x000D_
	LOC642031	TPGS1		AK5						CSNK2B	AP002990.1			_x000D_
	LOC642033	DUSP4		HECTD2						CSPP1	C11orf98			_x000D_
	LOC642076	SBK1		ZNF285						CSRNP2	LBHD1			_x000D_
	LOC642082	RBM14-RBM4		ZNF764						CSRP1	CSKMT			_x000D_
	LOC642197	MIR1236		ZNF415						CSRP2	SNORA57			_x000D_
	LOC642210	ASUN		ST20						CST3	UQCC3			_x000D_
	LOC642236	SERPINF2		PPIL2						CSTB	LRRN4CL			_x000D_
	LOC642250	HOXC9		CIZ1						CSTF2	HNRNPUL2-BSCL2			_x000D_
	LOC642255	DBH		IMMP1L						CSTF3	RNU2-2P			_x000D_
	LOC642333	SGK223		AHRR						CTBP1	PLAAT4			_x000D_
	LOC642357	LOC728392		HMOX2						CTBP2	PLAAT3			_x000D_
	LOC642361	INPP5D		YBX3						CTBS	SPINDOC			_x000D_
	LOC642367	HLA-DRB1		STK38L						CTCF	RCOR2			_x000D_
	LOC642393	KRT4		FAM200B						CTDP1	PPP1R14B-AS1			_x000D_
	LOC642412	TMEM246		SPRTN						CTDSP1	NEAT1			_x000D_
	LOC642446	WFDC2		CDK17						CTDSP2	ZNRD2			_x000D_
	LOC642469	MTERFD3		ZNF561						CTDSPL	PCNX3			_x000D_
	LOC642489	KLHDC9		ZBTB6						CTDSPL2	B4GAT1			_x000D_
	LOC642513	LOC100130093		METRN						CTF1	GRK2			_x000D_
	LOC642567	MGC27345		SPECC1						CTH	AP002807.1			_x000D_
	LOC642590	ADC		RCCD1						CTHRC1	KMT5B			_x000D_
	LOC642738	FLVCR1-AS1		UGGT1						CTNNA1	GAL			_x000D_
	LOC642741	PSORS1C1		EIF1AD						CTNNAL1	LTO1			_x000D_
	LOC642755	LCN12		CEP104						CTNNB1	AP002387.1			_x000D_
	LOC642771	MLF1IP		DCLRE1A						CTNNBIP1	FAM86C1P			_x000D_
	LOC642784	FNDC5		ZCCHC2						CTNNBL1	AP002495.1			_x000D_
	LOC642817	LOC101060455		MOK						CTNND1	C2CD3			_x000D_
	LOC642828	LOC339803		EMILIN1						CTNS	KCNE3			_x000D_
	LOC642892	ODF3B		USP19						CTPS2	AP001372.2			_x000D_
	LOC642897	AQP7		ZNF445						CTR9	NEU3			_x000D_
	LOC642909	SLC22A18AS		METTL15						CTSA	AP001972.5			_x000D_
	LOC642934	RHBDL1		IBA57						CTSB	SNORD15B			_x000D_
	LOC642946	SLC22A2		TET3						CTSC	THAP12			_x000D_
	LOC642947	ZNF311		ZNF510						CTSD	AP002360.1			_x000D_
	LOC642956	ZNF541		ZNF496						CTSF	EMSY			_x000D_
	LOC642975	RPH3AL		ZNF135						CTSK	RPS28P7			_x000D_
	LOC642989	MYT1		HSF4						CTSO	RAB30-DT			_x000D_
	LOC643007	CLEC4E		TRMT10A						CTSZ	AP000873.1			_x000D_
	LOC643031	LOC100996253		PARP11						CTTN	CCDC89			_x000D_
	LOC643035	SFTPA1		FUT10						CTTNBP2NL	HIKESHI			_x000D_
	LOC643167	B3GNT3		MAPK10						CTU2	CCDC81			_x000D_
	LOC643224	LOC101059961		SHF						CUEDC1	NAALAD2			_x000D_
	LOC643284	IGHG1		FLT3LG						CUEDC2	TUBAP2			_x000D_
	LOC643287	PROB1		SPICE1						CUL1	CEP295			_x000D_
	LOC643300	LOC101059993		SETD9						CUL2	SCARNA9			_x000D_
	LOC643310	LOC100287896		AKIP1						CUL4A	TAF1D			_x000D_
	LOC643319	ZNF497		C4orf3						CUL4B	MRE11			_x000D_
	LOC643336	C15orf27		OLA1						CUL5	SESN3			_x000D_
	LOC643357	LOC441239		SEC14L2						CUL7	TRPC6			_x000D_
	LOC643358	CHRD		CERS5						CUL9	CFAP300			_x000D_
	LOC643384	NPAS3		QRSL1						CUTA	PDGFD			_x000D_
	LOC643387	LOC100996732		ELK3						CUTC	CASP4LP			_x000D_
	LOC643433	TEX36		ARHGAP5						CWC15	CASP1			_x000D_
	LOC643438	INADL		FANCA						CWF19L1	AP001282.2			_x000D_
	LOC643446	GPR6		TNFRSF11B						CWF19L2	POGLUT3			_x000D_
	LOC643452	PAX5		DCAF13						CXorf38	NKAPD1			_x000D_
	LOC643507	CMPK2		DPYSL4						CXXC1	LINC02762			_x000D_
	LOC643509	CHST13		SMAD6						CXXC5	ZBTB16			_x000D_
	LOC643531	RAET1G		ANKRD52						CYB561	ZPR1			_x000D_
	LOC643668	GSTM2P1		CCDC126						CYB561D1	AP005018.2			_x000D_
	LOC643778	CAMKV		SNX18						CYB561D2	AP000892.4			_x000D_
	LOC643779	LOC100288152		SEMA3A						CYB5A	ATP5MG			_x000D_
	LOC643790	FLJ45340		ZNF552						CYB5B	CENATAC			_x000D_
	LOC643802	GUCA1A		AKAP9						CYB5D1	H2AX			_x000D_
	LOC643856	MNF1		PDE3B						CYB5D2	NECTIN1			_x000D_
	LOC643863	C17orf72		NUDT19						CYB5R1	TLCD5			_x000D_
	LOC643870	ADARB2		MXI1						CYB5R3	MIR100HG			_x000D_
	LOC643873	NCF1		MAST4						CYB5R4	JHY			_x000D_
	LOC643882	C16orf55		ZNF684						CYBA	SRPRA			_x000D_
	LOC643911	LOC100132999		TAF1A						CYBRD1	GSEC			_x000D_
	LOC643949	LOC100288504		EFCAB11						CYC1	ADAMTS8			_x000D_
	LOC643997	TRPM2		TRIM34						CYCS	ADAMTS15			_x000D_
	LOC644029	MIR1292		ZNF470						CYFIP1	AP003486.1			_x000D_
	LOC644033	LOC652276		SLC1A4						CYGB	WASH8P			_x000D_
	LOC644039	CHRND		DSEL						CYLD	AC004803.1			_x000D_
	LOC644063	SYTL3		SYTL4						CYP1B1	FBXL14			_x000D_
	LOC644101	LTB4R2		PDLIM4						CYP20A1	AC005912.1			_x000D_
	LOC644124	C1orf158		CRNKL1						CYP2R1	CRACR2A			_x000D_
	LOC644128	DUOXA1		IL6ST						CYP2U1	TIGAR			_x000D_
	LOC644131	TRIM50		PODN						CYP4V2	AC005833.1			_x000D_
	LOC644132	KIF21B		CEP68						CYTH1	CD27-AS1			_x000D_
	LOC644162	LOC100132167		ORC4						CYTH2	CD4			_x000D_
	LOC644191	TREML1		NPM1						CYTH3	P3H3			_x000D_
	LOC644214	OTTHUMG00000167594		SVIP						D2HGDH	SCARNA12			_x000D_
	LOC644237	HRH3		FAM114A2						DAAM1	A2M			_x000D_
	LOC644250	HLA-DQB1		CRTC1						DAB2	AC010186.2			_x000D_
	LOC644265	LPA		BCAS3						DACT3	AC010186.3			_x000D_
	LOC644310	CSMD2		FPGT						DAD1	CLEC2B			_x000D_
	LOC644315	NUDT16P1		TMEM230						DAG1	OLR1			_x000D_
	LOC644330	BHLHE41		MOB2						DAGLB	TMEM52B			_x000D_
	LOC644363	PRSS8		KBTBD7						DALRD3	SMIM10L1			_x000D_
	LOC644422	SLC52A3		PIK3R3						DAP	MANSC1			_x000D_
	LOC644464	PROM2		ABHD13						DAP3	BORCS5			_x000D_
	LOC644511	SEC1P		HMGN3						DAPK3	AC008115.3			_x000D_
	LOC644517	---		ZC2HC1A						DARS2	GPRC5D-AS1			_x000D_
	LOC644563	CCDC180		GPATCH1						DAXX	FAM234B			_x000D_
	LOC644584	BCL11A		ZBTB8A						DAZAP1	H4-16			_x000D_
	LOC644591	LOC100288778		PEX26						DAZAP2	H2AJ			_x000D_
	LOC644604	PKD1L1		MAPK11						DBI	ART4			_x000D_
	LOC644615	LOC101060439		THAP2						DBN1	RERG			_x000D_
	LOC644619	SPN		ZNF595						DBNDD2	PDE3A			_x000D_
	LOC644634	NAPSB		ZFYVE9						DBNL	SOX5			_x000D_
	LOC644684	FLJ14186		AP5B1						DBR1	ETFRF1			_x000D_
	LOC644739	TMPRSS4		MIS18BP1						DBT	RASSF8-AS1			_x000D_
	LOC644745	C8orf34		WDR89						DCAF10	INTS13			_x000D_
	LOC644761	GPR132		ATXN7						DCAF16	AC092747.4			_x000D_
	LOC644762	CARNS1		ZNF8						DCAF6	AC009318.2			_x000D_
	LOC644774	MYEOV		IL15RA						DCAF7	TMTC1			_x000D_
	LOC644790	LINC00969		NIT1						DCAKD	SINHCAF			_x000D_
	LOC644799	CKMT1A		ZNF587						DCBLD2	ETFBKMT			_x000D_
	LOC644852	CLCNKB		PGGT1B						DCK	RESF1			_x000D_
	LOC644863	SPTSSB		DNPH1						DCLRE1C	PKP2			_x000D_
	LOC644869	GOLGA8CP		ATF7						DCP1A	ALG10			_x000D_
	LOC644877	LOC100287042		PLEKHA8P1						DCP2	SLC38A4			_x000D_
	LOC644879	DTX2P1-UPK3BP1-PMS2P11		TEFM						DCPS	SNORA2C			_x000D_
	LOC644907	PDZD3		FBXO36						DCTD	FMNL3			_x000D_
	LOC644914	LOC100510707		GXYLT2						DCTN1	POU6F1			_x000D_
	LOC644928	CORO1A		SLC25A51						DCTN2	ACVRL1			_x000D_
	LOC644931	HEYL		JRK						DCTN3	TAMALIN			_x000D_
	LOC644934	IL12RB2		ZNF333						DCTN4	ATG101			_x000D_
	LOC644935	PP13		SYNE1						DCTN5	OR7E47P			_x000D_
	LOC644936	SUSD4		ERCC4						DCTN6	AC068888.1			_x000D_
	LOC644937	NMUR1		PRR5L						DCTPP1	TNS2			_x000D_
	LOC644979	B4GALNT1		ZDBF2						DCUN1D1	MYG1-AS1			_x000D_
	LOC644988	SLC7A8		SERTAD4						DCUN1D3	MYG1			_x000D_
	LOC645015	ADAM8		NUP98						DCUN1D4	AC023509.1			_x000D_
	LOC645018	ADD2		IFIT3						DCUN1D5	ATP5MC2			_x000D_
	LOC645058	POTEG		CYP27A1						DCXR	PHC1P1			_x000D_
	LOC645094	ARID3B		IFT57						DDA1	ITGA7			_x000D_
	LOC645100	TMEM139		INHBA						DDAH1	AC009779.2			_x000D_
	LOC645138	CD7		ZNF649						DDAH2	PYM1			_x000D_
	LOC645157	CYP2S1		ZNF592						DDB1	ERBB3			_x000D_
	LOC645166	MRVI1		DOK1						DDHD2	ATP5F1B			_x000D_
	LOC645173	TSPAN32		MTPAP						DDIT3	NEMP1			_x000D_
	LOC645174	VWCE		CCDC85C						DDIT4	INHBE			_x000D_
	LOC645175	SLC4A11		SIK2						DDOST	MARS1			_x000D_
	LOC645233	CYP46A1		AP5S1						DDR1	ARHGEF25			_x000D_
	LOC645236	PRRT2		SYNPO2						DDRGK1	MARCHF9			_x000D_
	LOC645251	MIR3656		APC						DDT	EEF1AKMT3			_x000D_
	LOC645296	LTA		MDM2						DDX1	AVIL			_x000D_
	LOC645317	SMEK1		ACSS1						DDX10	GIHCG			_x000D_
	LOC645332	CYP4F8		EGFL8						DDX17	ATP23			_x000D_
	LOC645381	FA2H		GAB1						DDX18	AC048341.2			_x000D_
	LOC645385	ZNF321P		TRAPPC10						DDX19A	RPL14P1			_x000D_
	LOC645387	TUBB4A		TRAM1L1						DDX19B	RXYLT1			_x000D_
	LOC645436	KLHL3		KIAA1217						DDX21	PABPC1P4			_x000D_
	LOC645452	MST1R		UTP20						DDX23	IRAK3			_x000D_
	LOC645466	HSP90AA4P		NOX4						DDX24	HELB			_x000D_
	LOC645489	TIE1		PGAP1						DDX27	AC025423.2			_x000D_
	LOC645515	SIGLEC15		ZNF224						DDX28	PRANCR			_x000D_
	LOC645586	RTP1		TRDMT1						DDX31	LNCOG			_x000D_
	LOC645609	PIGZ		SNX32						DDX3X	LIN7A			_x000D_
	LOC645630	SVILP1		RAD52						DDX41	SLC6A15			_x000D_
	LOC645638	CYTH4		NCKAP5L						DDX42	NUDT4			_x000D_
	LOC645676	FGD3		CD40						DDX46	PLXNC1			_x000D_
	LOC645683	EVX1		AK4						DDX47	CEP83			_x000D_
	LOC645688	ACY3		B4GALT6						DDX49	SLC9A7P1			_x000D_
	LOC645691	EFNA3		ZNF720						DDX5	SNORA53			_x000D_
	LOC645693	CEACAM4		PODNL1						DDX50	AC126474.2			_x000D_
	LOC645715	ASB9		MAMDC4						DDX51	NR1H4			_x000D_
	LOC645762	FAM215A		MMP17						DDX52	ANO4			_x000D_
	LOC645895	CHAT		ARL6						DDX55	WASHC3			_x000D_
	LOC645899	ZC3H12D		EVA1A						DDX56	IGF1			_x000D_
	LOC645937	CLCN2		KAT7						DDX59	C12orf73			_x000D_
	LOC645969	PDE2A		TIMM13						DDX60	RPL18AP3			_x000D_
	LOC645979	TMC8		COX16						DEAF1	WASHC4			_x000D_
	LOC646034	PLXNB3		CAT						DECR1	TCP11L2			_x000D_
	LOC646044	HIPK4		DCAF11						DECR2	TMEM263			_x000D_
	LOC646103	CYP4F3		NUDCD1						DEDD	MTERF2			_x000D_
	LOC646135	CHRFAM7A		LMF1						DEDD2	PHETA1			_x000D_
	LOC646144	GPR114		FANCF						DEF8	MAPKAPK5-AS1			_x000D_
	LOC646195	CEACAM1		PAPOLG						DEGS1	RN7SKP71			_x000D_
	LOC646197	LOC100129717		MLF1						DEK	RITA1			_x000D_
	LOC646200	PADI1		KPNA5						DENND1A	SLC8B1			_x000D_
	LOC646278	MEI1		ECI1						DENND4A	TBX5			_x000D_
	LOC646294	CCDC64		TVP23B						DENND4B	TBX5-AS1			_x000D_
	LOC646316	FGF17		ZNF664						DENND4C	SPRING1			_x000D_
	LOC646330	KRTAP5-5		ORAI2						DENND5A	RPS2P5			_x000D_
	LOC646345	RNF223		APOL6						DENND5B	GCN1			_x000D_
	LOC646347	SLC6A13		CASD1						DENR	PXN-AS1			_x000D_
	LOC646348	LOC155060		DZIP3						DERA	RNU4-2			_x000D_
	LOC646463	GLYATL1		ZNF566						DERL1	RNU4-1			_x000D_
	LOC646483	KLK2		ZNF92						DERL2	SRSF9			_x000D_
	LOC646527	VWF		FXN						DET1	NRAV			_x000D_
	LOC646531	GSG1L		ZKSCAN7						DFFA	LINC01089			_x000D_
	LOC646567	GRID1		NT5C3B						DFFB	CFAP251			_x000D_
	LOC646609	APOBR		ZNRF1						DGAT1	AC156455.1			_x000D_
	LOC646630	NOS2		ZNF2						DGCR2	KMT5A			_x000D_
	LOC646672	JPH4		NT5C3A						DGCR6	RFLNA			_x000D_
	LOC646675	KIRREL3		BROX						DGCR6L	SNORA49			_x000D_
	LOC646688	KLHL13		TCEANC2						DGCR8	EP400P1			_x000D_
	LOC646723	SEMA6B		EHMT2						DGKA	EEF1AKMT1			_x000D_
	LOC646753	NKX2-1		RAD51D						DGKD	MRPL57			_x000D_
	LOC646766	SULT1C4		NOL9						DGKQ	ZDHHC20			_x000D_
	LOC646785	EMX1		TYW5						DGUOK	FTH1P7			_x000D_
	LOC646786	LPPR4		EXOG						DHCR24	SGCG			_x000D_
	LOC646791	ANKLE1		ZCCHC4						DHCR7	LINC00327			_x000D_
	LOC646819	LOC101060620		BRAF						DHDDS	NUP58			_x000D_
	LOC646821	PDZD7		TRMT10B						DHPS	MEDAG			_x000D_
	LOC646849	IL22RA1		TP73-AS1						DHRS1	B3GLCT			_x000D_
	LOC646909	TSPAN15		FANCD2						DHRS3	BRCA2			_x000D_
	LOC646936	OLFM1		PTGER2						DHRS4	SPART			_x000D_
	LOC646942	TMC6		MBP						DHRS7	SMAD9			_x000D_
	LOC646956	KRT83		ZNF880						DHRS7B	TRPC4			_x000D_
	LOC646993	FAM225A		ZNF467						DHRSX	LHFPL6			_x000D_
	LOC646996	SEC14L4		ZNF765						DHX15	RGCC			_x000D_
	LOC647000	TMEM249		JKAMP						DHX16	DGKH			_x000D_
	LOC647009	LOC729815		CSGALNACT2						DHX29	ENOX1			_x000D_
	LOC647030	SLC25A35		MSI2						DHX30	CCDC122			_x000D_
	LOC647037	TTYH1		TVP23C						DHX32	GPALPP1			_x000D_
	LOC647081	EMR2		MAP3K10						DHX33	TPT1-AS1			_x000D_
	LOC647099	CIDEB		SLITRK4						DHX34	RCN1P2			_x000D_
	LOC647104	SIDT1		CCDC57						DHX35	ZC3H13			_x000D_
	LOC647150	RUNX3		KIAA1841						DHX36	DLEU2			_x000D_
	LOC647276	NLGN3		MIPOL1						DHX37	AL137058.2			_x000D_
	LOC647285	SOX10		RNLS						DHX38	MRPS31P4			_x000D_
	LOC647302	MADCAM1		RNF216P1						DHX40	OBI1			_x000D_
	LOC647307	LDLRAD2		PRELID2						DHX9	SLITRK6			_x000D_
	LOC647340	FAM83A-AS1		LYNX1						DIABLO	MIR17HG			_x000D_
	LOC647346	CD300C		C2orf74						DIAPH1	RN7SKP9			_x000D_
	LOC647349	LGI4		MTRF1						DIAPH2	PCCA-DT			_x000D_
	LOC647361	CIITA		FDXR						DIAPH3	POGLUT2			_x000D_
	LOC647389	SERPINB3		RNPEPL1						DICER1	NAXD			_x000D_
	LOC647436	DDX11L2		EIF2D						DIDO1	ANKRD10-IT1			_x000D_
	LOC647474	SCARA5		TMEM8B						DIP2B	F10			_x000D_
	LOC647588	MIOX		RGS4						DIP2C	GAS6-DT			_x000D_
	LOC647597	UPK1A		ICAM1						DIS3L	SNORA79B			_x000D_
	LOC647650	GPR157		LUC7L3						DIS3L2	AL355075.4			_x000D_
	LOC647673	ICAM2		PEX2						DISP1	PIP4P1			_x000D_
	LOC647856	GSAP		SLC7A2						DIXDC1	AL163636.1			_x000D_
	LOC647886	LOC646513		PTBP3						DKC1	LINC00641			_x000D_
	LOC648000	CHN2		NFYB						DKK3	DHRS4-AS1			_x000D_
	LOC648024	CDA		WDR5B						DLAT	AL136295.1			_x000D_
	LOC648099	PRAP1		POT1						DLC1	TGM1			_x000D_
	LOC648176	MT1JP		MAF						DLD	STXBP6			_x000D_
	LOC648189	KLK6		USP12						DLEU1	AL445363.3			_x000D_
	LOC648210	CCL25		ZNF703						DLG4	RNU1-27P			_x000D_
	LOC648249	LINC00526		HNRNPLL						DLG5	RNU1-28P			_x000D_
	LOC648283	C7orf13		ZBTB14						DLGAP4	PRORP			_x000D_
	LOC648294	LOC100506124		ANXA4						DLST	AL121594.1			_x000D_
	LOC648343	LOC100129395		DDX58						DMAP1	CLEC14A			_x000D_
	LOC648390	GAP43		COX18						DMTF1	MIA2			_x000D_
	LOC648399	CD79A		FBXO45						DMWD	LRFN5			_x000D_
	LOC648581	LOC100506248		ZNF507						DNAJA1	TOGARAM1			_x000D_
	LOC648622	CACNA2D2		ZBTB1						DNAJA2	RPL32P29			_x000D_
	LOC648638	WHSC1L1		INCENP						DNAJA3	RHOQP1			_x000D_
	LOC648695	WHAMMP2		KIAA1586						DNAJB1	DNAAF2			_x000D_
	LOC648705	HBA1		DDX39A						DNAJB11	KLHDC1			_x000D_
	LOC648729	PROM1		AFAP1L1						DNAJB12	RN7SL3			_x000D_
	LOC648771	HKR1		ZNF480						DNAJB14	RN7SL2			_x000D_
	LOC648852	SNX10		USP53						DNAJB2	VCPKMT			_x000D_
	LOC648907	DENND1C		TFAP4						DNAJB4	DMAC2L			_x000D_
	LOC648921	VSIG2		ZNF71						DNAJB5	RTRAF			_x000D_
	LOC648927	SOGA2		TAMM41						DNAJB6	ERO1A			_x000D_
	LOC648980	LOC100996752		RPGRIP1L						DNAJB9	CNIH1			_x000D_
	LOC649009	C16orf46		KRBOX4						DNAJC1	GCH1			_x000D_
	LOC649049	SLC9A5		FBXW8						DNAJC10	PELI2			_x000D_
	LOC649076	FAM71E1		ZNF287						DNAJC13	ARMH4			_x000D_
	LOC649150	GNB3		JAK2						DNAJC14	PSMA3-AS1			_x000D_
	LOC649169	SHC3		TMEM182						DNAJC15	PCNX4			_x000D_
	LOC649330	SYTL1		MPND						DNAJC17	RAD51B			_x000D_
	LOC649447	HLA-DMB		ZC4H2						DNAJC18	SUSD6			_x000D_
	LOC649548	LRRC56		BICD1						DNAJC19	RPL7AP6			_x000D_
	LOC649553	C2orf70		ZNF382						DNAJC21	SYNJ2BP-COX16			_x000D_
	LOC649555	C16orf86		MMS22L						DNAJC24	PCNX1			_x000D_
	LOC649604	LOC285540		SP4						DNAJC25	RIOX1			_x000D_
	LOC649821	MAL		CACNA1C						DNAJC27	MIDEAS			_x000D_
	LOC649946	ZNF767		LIMK2						DNAJC3	FAM161B			_x000D_
	LOC650020	BRSK2		MTMR1						DNAJC30	ENTPD5			_x000D_
	LOC650029	ADSSL1		PPP1R21						DNAJC4	BBOF1			_x000D_
	LOC650111	PITPNM2		KLHDC10						DNAJC5	ERG28			_x000D_
	LOC650128	GRM4		ZNF433						DNAJC7	CIPC			_x000D_
	LOC650132	MAP3K14-AS1		C19orf47						DNAJC8	DIO2			_x000D_
	LOC650152	HID1		FAM228B						DNAJC9	GTF2A1			_x000D_
	LOC650157	PRRT4		GPATCH2L						DNAL1	RN7SKP255			_x000D_
	LOC650215	KIR3DL2		CFB						DNAL4	DGLUCY			_x000D_
	LOC650254	PCSK4		AAMDC						DNASE1L1	PPP4R3A			_x000D_
	LOC650276	PLCH2		BDNF						DNASE2	GON7			_x000D_
	LOC650298	TCF7		CPPED1						DNM1L	AL049839.2			_x000D_
	LOC650369	CDH16		ARMCX5-GPRASP2						DNM2	SERPINA3			_x000D_
	LOC650494	JHDM1D		RPL22L1						DNMT1	SYNE3			_x000D_
	LOC650515	SAPCD2		AGPAT3						DNPEP	SNHG10			_x000D_
	LOC650518	XIRP1		GRK6						DNTTIP1	SCARNA13			_x000D_
	LOC650646	NTNG2		APOL1						DOCK1	BDKRB2			_x000D_
	LOC650717	DENND6B		LMO7						DOCK11	BDKRB1			_x000D_
	LOC650737	PQLC2		TMEM68						DOCK5	RPL3P4			_x000D_
	LOC650803	NECAB2		TBCEL						DOCK6	AL162151.2			_x000D_
	LOC650832	NMNAT3		RAP2B						DOCK7	WARS1			_x000D_
	LOC651064	SFTPB		PDK1						DOK4	MEG3			_x000D_
	LOC651143	GPR125		NADK2						DOLK	AL117190.1			_x000D_
	LOC651149	ADCK4		NDOR1						DOLPP1	MEG9			_x000D_
	LOC651198	GPR39		KDM8						DONSON	COA8			_x000D_
	LOC651202	CCL3L1		TRAPPC13						DPAGT1	AL139300.1			_x000D_
	LOC651436	SLC25A47		ZNF440						DPF2	AL049840.6			_x000D_
	LOC651453	GRIK5		C15orf61						DPH2	AL049840.5			_x000D_
	LOC651575	C11orf85		PSTK						DPH3	ATP5MPL			_x000D_
	LOC651697	KLK3		ZNF667						DPH5	ADSS1			_x000D_
	LOC651816	C6orf165		BTN3A3						DPM1	CLBA1			_x000D_
	LOC651894	IKZF4		METTL8						DPM2	HERC2P3			_x000D_
	LOC652071	MYO1G		LRRC37A						DPM3	AC138649.4			_x000D_
	LOC652330	C17orf51		PGBD2						DPP3	SNHG14			_x000D_
	LOC652388	C2orf16		CCDC9						DPP7	PWAR5			_x000D_
	LOC652455	SLC22A8		ZNF155						DPP8	AC124312.3			_x000D_
	LOC652458	C5orf42		OXLD1						DPP9	RPL41P2			_x000D_
	LOC652481	LOC339166		ZNF780A						DPY19L1	NSMCE3			_x000D_
	LOC652489	TMEM184A		ZNF772						DPY19L4	AC127502.1			_x000D_
	LOC652545	IGSF3		ETV3						DPY30	AC127502.2			_x000D_
	LOC652595	CELF3		PABPC4L						DPYD	AC091057.1			_x000D_
	LOC652608	SHBG		MAMDC2						DPYSL2	AC135983.2			_x000D_
	LOC652615	AGBL4		AMER1						DPYSL3	AC123768.3			_x000D_
	LOC652624	ESR1		SPATA24						DR1	GOLGA8N			_x000D_
	LOC652672	LOC100508408		SCLT1						DRAM1	ACTC1			_x000D_
	LOC652675	MT1IP		ASB16-AS1						DRAP1	CDIN1			_x000D_
	LOC652685	C11orf94		GTF2IRD2						DRG1	AC037198.1			_x000D_
	LOC652694	HAMP		FOS						DRG2	INAFM2			_x000D_
	LOC652726	GGT5		CLSTN3						DSCC1	CCDC32			_x000D_
	LOC652773	YPEL1		TRA2B						DSE	KNL1			_x000D_
	LOC652815	F12		NFATC4						DSN1	RAD51-AS1			_x000D_
	LOC652826	PRSS22		PSMA7						DSTN	OIP5-AS1			_x000D_
	LOC652864	CLVS1		UMPS						DSTYK	JMJD7-PLA2G4B			_x000D_
	LOC652903	ADRA2C		TAF11						DTD1	GOLM2			_x000D_
	LOC652968	NCKAP1L		GOLGA8A						DTWD1	EIF3J-DT			_x000D_
	LOC653079	PLK1S1		LAMA4						DTX2	TRIM69			_x000D_
	LOC653086	SLC25A45		SMIM15						DUS1L	AC051619.6			_x000D_
	LOC653103	JMJD7		DBF4						DUS3L	AC051619.7			_x000D_
	LOC653147	FAM206A		EDIL3						DUS4L	SLC30A4			_x000D_
	LOC653162	GNLY		FAM98B						DUSP1	SQOR			_x000D_
	LOC653171	C6orf223		METTL6						DUSP10	FAM227B			_x000D_
	LOC653199	FAM213A		HIP1						DUSP11	FGF7			_x000D_
	LOC653226	PPM1L		SYNRG						DUSP12	ATP8B4			_x000D_
	LOC653232	TENC1		PCTP						DUSP14	GABPB1-AS1			_x000D_
	LOC653308	LOC101060347		ZNF639						DUSP16	TNFAIP8L3			_x000D_
	LOC653314	MARC2		ATG13						DUSP18	PIGBOS1			_x000D_
	LOC653344	DARC		APBB2						DUSP22	C15orf65			_x000D_
	LOC653354	LOC100506562		SUV39H2						DUSP23	PYGO1			_x000D_
	LOC653377	CCDC166		TAF9B						DUSP3	POLR2M			_x000D_
	LOC653381	FAM203A		ZNF710						DUSP5	MINDY2			_x000D_
	LOC653383	MRVI1-AS1		ACSF3						DUSP6	RPS3AP6			_x000D_
	LOC653438	SNORA72		SARNP						DUT	ICE2			_x000D_
	LOC653450	HK3		ARID2						DVL1	FBXL22			_x000D_
	LOC653472	HNRNPU-AS1		IL32						DVL2	CIAO2A			_x000D_
	LOC653479	RPS2P32		CTC1						DVL3	PCLAF			_x000D_
	LOC653489	LOC100288842		WDR76						DYM	RASL12			_x000D_
	LOC653496	LINC00035		ZNF443						DYNC1H1	CILP			_x000D_
	LOC653505	DNM1P35		ZNF276						DYNC1I2	RNU5A-1			_x000D_
	LOC653506	LINC00235		ARID5A						DYNC1LI2	RNU5B-1			_x000D_
	LOC653557	SFTPC		CNTROB						DYNC2H1	HACD3			_x000D_
	LOC653566	PWP2		TRHDE						DYNC2LI1	INTS14			_x000D_
	LOC653631	LINC00657		ADAM33						DYNLL1	HMGB1P6			_x000D_
	LOC653658	PMEL		TRIM65						DYNLL2	NPTN-IT1			_x000D_
	LOC653702	RBM47		ZNF418						DYNLRB1	INSYN1			_x000D_
	LOC653737	CLEC18A		SIPA1L3						DYNLT1	LOXL1-AS1			_x000D_
	LOC653764	SPIN2A		ST7L						DYNLT3	ISLR			_x000D_
	LOC653773	C14orf1		ZNF555						DYRK1A	RPP25			_x000D_
	LOC653778	CORO7-PAM16		ZBTB7B						DYRK2	NEIL1			_x000D_
	LOC653820	DSC2		ARHGEF10L						DYRK3	ISL2			_x000D_
	LOC653874	EVPLL		MFSD9						DYRK4	MINAR1			_x000D_
	LOC653881	HOXD9		ITGB3						DZIP1	CEMIP			_x000D_
	LOC653884	MAP7		AHDC1						E2F3	MESD			_x000D_
	LOC653888	KIAA1551		HDLBP						E2F4	TLNRD1			_x000D_
	LOC653972	ARAP2		NBR1						E2F5	EFL1			_x000D_
	LOC653994	C8orf4		NXPE3						E2F6	UBE2Q2P2			_x000D_
	LOC654000	NEURL		TTC7A						E2F7	AC243919.1			_x000D_
	LOC654042	RGPD3		FAM104B						E4F1	GOLGA2P10			_x000D_
	LOC654103	PPM1H		CCDC68						EAF1	SNHG21			_x000D_
	LOC654121	LOC100128551		SP140L						EAPP	RAMAC			_x000D_
	LOC654161	YAE1D1		NEK8						EARS2	TM6SF1			_x000D_
	LOC654174	SLC19A1		RNF122						EBAG9	HDGFL3			_x000D_
	LOC654189	LOC100132062		ZNF441						EBNA1BP2	GOLGA2P7			_x000D_
	LOC654191	ATP13A5		ZNF70						EBP	GOLGA6L5P			_x000D_
	LOC654194	HOXA1		BNC1						EBPL	UBE2Q2P1			_x000D_
	LOC654244	FAAH2		RNF215						ECD	KLHL25			_x000D_
	LOC654260	NAT16		LENG9						ECE2	ARPIN-AP3S2			_x000D_
	LOC654350	NHLH1		HIVEP3						ECH1	ARPIN			_x000D_
	LOC678655	DNM3		RAB12						ECHDC2	GDPGP1			_x000D_
	LOC723972	KCNJ16		LRRC23						ECHS1	CHASERR			_x000D_
	LOC727726	MKL2		NABP2						ECM1	NR2F2-AS1			_x000D_
	LOC727732	LOC100506603		OARD1						ECSIT	AC090825.1			_x000D_
	LOC727758	KIF5A		IFT81						ECT2	SELENOS			_x000D_
	LOC727761	MSX2		ALG12						EDC3	PCSK6			_x000D_
	LOC727803	LOC100506548		NDRG2						EDC4	TARS3			_x000D_
	LOC727808	SH3D21		MAPK1IP1L						EDEM1	FAM234A			_x000D_
	LOC727821	ITGB6		DCAF4						EDEM2	PGAP6			_x000D_
	LOC727825	RAB9B		FAM229B						EDEM3	CAPN15			_x000D_
	LOC727826	C9orf41		CELF1						EDF1	METTL26			_x000D_
	LOC727848	LCE3D		NEK9						EED	MCRIP2			_x000D_
	LOC727865	C10orf111		CDK20						EEF1A1	ANTKMT			_x000D_
	LOC727866	MPZL3		MAN1A1						EEF1B2	CIAO3			_x000D_
	LOC727877	CASC5		SPECC1L						EEF1D	CACNA1H			_x000D_
	LOC727882	B3GAT2		ARL8A						EEF1E1	CRAMP1			_x000D_
	LOC727970	KIF18B		ARHGAP18						EEF1G	JPT2			_x000D_
	LOC727980	CCL27		SRSF5						EEF2	SLC9A3R2			_x000D_
	LOC727984	SEC16B		PRMT7						EEF2K	SNHG19			_x000D_
	LOC728006	TMPRSS9		EIF4E						EFEMP1	TEDC2			_x000D_
	LOC728014	UCN		RABL6						EFEMP2	AC141586.1			_x000D_
	LOC728026	IGLC1		ZNF747						EFHC1	PDPK2P			_x000D_
	LOC728031	LOC100996477		GLUD2						EFHD2	ERVK13-1			_x000D_
	LOC728037	LOC101060027		METTL2B						EFNA4	ELOB			_x000D_
	LOC728059	IGHM		TANGO2						EFR3A	ZNF213-AS1			_x000D_
	LOC728060	C17orf99		PTER						EFTUD2	AC108134.2			_x000D_
	LOC728069	C21orf67		ABCA5						EGFR	ZNF597			_x000D_
	LOC728098	ACTR3C		AMIGO2						EGLN1	PAM16			_x000D_
	LOC728105	ROPN1B		INPP4A						EGLN2	C16orf71			_x000D_
	LOC728126	LINC00656		PRKCE						EGR1	EEF2KMT			_x000D_
	LOC728127	CELP		TRAPPC8						EHBP1	MRTFB			_x000D_
	LOC728128	LOC338797		NANP						EHBP1L1	NPIPA1			_x000D_
	LOC728138	LOC100507577		ZNF136						EHD1	PKD1P3			_x000D_
	LOC728139	IGHA1		ZNF670						EHD2	NPIPP1			_x000D_
	LOC728153	PRSS1		ZNF322						EHD4	PKD1P6-NPIPP1			_x000D_
	LOC728188	TDGF1P3		SLC2A11						EI24	PKD1P6			_x000D_
	LOC728208	LOC100506486		RBM19						EID1	NPIPA5			_x000D_
	LOC728244	FBXW4P1		HFE						EID2	BMERB1			_x000D_
	LOC728263	POM121L9P		MDN1						EIF1	MARF1			_x000D_
	LOC728285	FN3K		MBOAT1						EIF1AX	AC026401.3			_x000D_
	LOC728312	TTC3P1		MPP3						EIF1B	CEP20			_x000D_
	LOC728324	SDCBP2		MSL2						EIF2A	AC138969.1			_x000D_
	LOC728368	LOC100507412		RFT1						EIF2AK1	NPIPA7			_x000D_
	LOC728408	SEPT4		CCDC82						EIF2AK2	XYLT1			_x000D_
	LOC728416	EFCAB4A		STARD4						EIF2AK3	PKD1P4			_x000D_
	LOC728428	RGL3		STYX						EIF2AK4	NPIPA9			_x000D_
	LOC728431	NKX2-5		PPP4R2						EIF2B1	PKD1P5			_x000D_
	LOC728453	LOC100133091		FBXO44						EIF2B2	AC138811.2			_x000D_
	LOC728457	FAM115C		RBAK						EIF2B3	VPS35L			_x000D_
	LOC728476	LOC100289409		GIN1						EIF2B4	NPIPB3			_x000D_
	LOC728481	PPARGC1B		SLC35D1						EIF2B5	SMG1P3			_x000D_
	LOC728484	NINJ2		TGFB2						EIF2S1	RRN3P1			_x000D_
	LOC728492	OTTHUMG00000166241		AP1G2						EIF2S2	NPIPB4			_x000D_
	LOC728499	ICAM5		BOD1L1						EIF2S3	MOSMO			_x000D_
	LOC728505	IL23A		MECR						EIF3A	SMG1P1			_x000D_
	LOC728517	IGHG3		REST						EIF3B	NPIPB5			_x000D_
	LOC728532	CYP2F1		FGF5						EIF3C	IL21R			_x000D_
	LOC728533	ND1		GEN1						EIF3D	KATNIP			_x000D_
	LOC728553	C20orf96		EPC1						EIF3E	SGF29			_x000D_
	LOC728556	SPRNP1		ZNF33B						EIF3F	BOLA2-SMG1P6			_x000D_
	LOC728564	CDH22		NXT2						EIF3G	SLX1B			_x000D_
	LOC728565	CD300LG		PDE10A						EIF3H	SLX1B-SULT1A4			_x000D_
	LOC728576	PLGLB1		PLAG1						EIF3I	NPIPB12			_x000D_
	LOC728590	ITGAX		ZNF43						EIF3J	SMG1P2			_x000D_
	LOC728602	LOC654780		EMC6						EIF3K	BOLA2B			_x000D_
	LOC728620	ROCK1P1		ENDOV						EIF3L	SLX1A			_x000D_
	LOC728635	TRBC1		FLCN						EIF3M	SLX1A-SULT1A3			_x000D_
	LOC728640	KIR2DL1		PRPF40B						EIF4A1	SMG1P5			_x000D_
	LOC728643	LINC00114		ZNF41						EIF4A2	AC135048.1			_x000D_
	LOC728650	ZFYVE28		APLF						EIF4A3	AC135050.6			_x000D_
	LOC728658	LOC100133299		PLA2R1						EIF4B	AC026471.1			_x000D_
	LOC728661	IGH		ACTR3B						EIF4E2	RUSF1			_x000D_
	LOC728666	GLS2		SLX4						EIF4E3	CLUHP3			_x000D_
	LOC728672	LOC100287098		ARL17A						EIF4EBP1	RAB43P1			_x000D_
	LOC728689	TF		TMEM241						EIF4EBP2	TENT4B			_x000D_
	LOC728693	C4BPB		UHMK1						EIF4ENIF1	HNRNPA1P48			_x000D_
	LOC728698	KCNIP2		CSF1						EIF4G1	CES1			_x000D_
	LOC728732	HCN3		SETD4						EIF4G2	MT1L			_x000D_
	LOC728734	TMC3		BICC1						EIF4G3	AC012181.1			_x000D_
	LOC728739	VPRBP		TMTC4						EIF4H	PSME3IP1			_x000D_
	LOC728748	RSPH10B		RAB42						EIF5	ADGRG1			_x000D_
	LOC728755	LOC80154		RREB1						EIF5A	CFAP20			_x000D_
	LOC728772	LAMB4		ZNF527						EIF5A2	CKLF-CMTM1			_x000D_
	LOC728779	TRIM63		NLRP1						EIF5B	CMTM1			_x000D_
	LOC728782	CGB7		CNTLN						EIF6	CIAO2B			_x000D_
	LOC728787	C6orf141		BMF						ELAC2	RIPOR1			_x000D_
	LOC728791	LOC100286925		ZDHHC21						ELF1	DUS2			_x000D_
	LOC728809	PSTPIP1		NFKBID						ELF2	UTP4			_x000D_
	LOC728820	LOC100288114		TTBK2						ELF4	AC026464.4			_x000D_
	LOC728823	KIF25-AS1		TMEM254						ELK1	PDF			_x000D_
	LOC728825	LINC00856		TIGD1						ELL	AC026464.6			_x000D_
	LOC728843	PAH		MCU						ELL2	PDXDC2P-NPIPB14P			_x000D_
	LOC728873	LOC642846		RNF182						ELMO2	NPIPB14P			_x000D_
	LOC728877	ESPNP		STRIP1						ELMOD2	SMG1P7			_x000D_
	LOC728888	DIO3OS		FAM214B						ELOF1	AARS1			_x000D_
	LOC728903	IZUMO1		MR1						ELOVL1	AC012184.2			_x000D_
	LOC728908	COX3		PPP1R18						ELOVL5	FCSK			_x000D_
	LOC728937	OBP2B		VMAC						ELOVL6	MTSS2			_x000D_
	LOC728944	TRAJ52		NEK11						ELP2	CMTR2			_x000D_
	LOC728953	MGC40069		PCDHGA7						ELP3	ZNF19			_x000D_
	LOC728965	ATP6		PLEKHG5						ELP4	ZNF821			_x000D_
	LOC728969	TRBV9		APBB1						EMD	AC009053.1			_x000D_
	LOC728973	LOC100128644		CYHR1						EMG1	NPIPB15			_x000D_
	LOC728975	NPSR1-AS1		ARHGAP11A						EMILIN2	KARS1			_x000D_
	LOC729009	GYPB		DST						EML1	VAT1L			_x000D_
	LOC729021	IGKV1-5		PLCB4						EML3	AC092718.3			_x000D_
	LOC729082	THPO		PCDHGB4						EML4	GAN			_x000D_
	LOC729086	GDPD1		ZNF235						EMP3	RN7SKP176			_x000D_
	LOC729090	KRT16P1		POC1B						ENAH	MEAK7			_x000D_
	LOC729101	IGK		ZBTB26						ENC1	C16orf74			_x000D_
	LOC729102	LOC100506748		DIP2A						ENDOD1	LINC01082			_x000D_
	LOC729120	CTB-89H12.4		SLC50A1						ENG	FENDRR			_x000D_
	LOC729123	LOC101060138		ERV3-1						ENO1	FOXF1			_x000D_
	LOC729142	DKFZP586I1420		ZFYVE27						ENO2	C16orf95			_x000D_
	LOC729143	LOC286052		WDPCP						ENOPH1	SNAI3-AS1			_x000D_
	LOC729148	OTTHUMG00000170856		PUS10						ENOSF1	ZNF778			_x000D_
	LOC729200	LOC100507254		ZNF268						ENOX2	SPATA33			_x000D_
	LOC729208	P2RY8		CAPZA1						ENSA	AFG3L1P			_x000D_
	LOC729217	LOC728613		HMGB1						ENTPD4	RFLNB			_x000D_
	LOC729222	FAM149A		GTF2H1						ENTPD6	TLCD3A			_x000D_
	LOC729236	LOC100128108		ANP32A						ENTPD7	MRM3			_x000D_
	LOC729255	LILRP2		CPSF7						ENY2	PITPNA-AS1			_x000D_
	LOC729279	RPSAP9		CSTF1						EP300	TLCD2			_x000D_
	LOC729298	SCARNA20		SAMHD1						EP400	MIR22HG			_x000D_
	LOC729301	CT60		G2E3						EPAS1	OVCA2			_x000D_
	LOC729317	ZHX1-C8ORF76		ABHD17B						EPB41L2	AC027796.4			_x000D_
	LOC729324	OTTHUMG00000160313		AKT3						EPB41L5	NCBP3			_x000D_
	LOC729340	LINC00273		PCGF3						EPDR1	C17orf107			_x000D_
	LOC729342			PLA2G6						EPHA2	ZNF232-AS1			_x000D_
	LOC729375			DTNB						EPHA4	PIMREG			_x000D_
	LOC729402			ARL14EP						EPHB4	ALOX12-AS1			_x000D_
	LOC729406			CACUL1						EPHX1	AC016876.2			_x000D_
	LOC729423			NF1						EPM2AIP1	SNORA48			_x000D_
	LOC729439			NEMF						EPN1	SNORD10			_x000D_
	LOC729446			SDC3						EPN2	AC016876.1			_x000D_
	LOC729466			KMT2A						EPS15	KDM6B			_x000D_
	LOC729495			METTL2A						EPS15L1	TMEM88			_x000D_
	LOC729500			CISD3						EPS8	SCARNA21			_x000D_
	LOC729505			FZD6						EPSTI1	RNF227			_x000D_
	LOC729535			DLG1						ERAL1	BORCS6			_x000D_
	LOC729559			HUS1						ERBB2	GLP2R			_x000D_
	LOC729580			NNAT						ERC1	MYOCD			_x000D_
	LOC729603			AMOT						ERCC1	COX10-AS1			_x000D_
	LOC729608			SREK1						ERCC2	AC005224.3			_x000D_
	LOC729617			CDC73						ERCC3	TVP23C-CDRT4			_x000D_
	LOC729660			MFHAS1						ERCC8	AC015922.3			_x000D_
	LOC729679			KMT2C						ERF	SNHG29			_x000D_
	LOC729680			IRGQ						ERGIC1	ZNF624			_x000D_
	LOC729686			RCC1						ERGIC3	USP32P1			_x000D_
	LOC729692			RASA4						ERH	MIEF2			_x000D_
	LOC729708			GPD2						ERI1	FAM106A			_x000D_
	LOC729742			CCDC71L						ERI3	CCDC144B			_x000D_
	LOC729764			NELFCD						ERICH1	ZNF286B			_x000D_
	LOC729768			SGMS1						ERLIN1	FOXO3B			_x000D_
	LOC729769			COX20						ERLIN2	TRIM16L			_x000D_
	LOC729774			ALKBH4						ERMAP	FAM83G			_x000D_
	LOC729776			MAGI1						ERMP1	SNORD3B-1			_x000D_
	LOC729779			NINL						ERP29	SNORD3B-2			_x000D_
	LOC729789			CCDC88A						ERRFI1	AC007952.4			_x000D_
	LOC729798			ATP10D						ESD	SNORD3C			_x000D_
	LOC729816			NAA30						ESRRA	RPS2P46			_x000D_
	LOC729841			SNED1						ESYT1	SNORA59B			_x000D_
	LOC729843			TIMM50						ETF1	CCDC144NL-AS1			_x000D_
	LOC729887			FLRT3						ETFA	NATD1			_x000D_
	LOC729903			SECTM1						ETFB	LINC02693			_x000D_
	LOC729926			GDAP1						ETFDH	UBBP4			_x000D_
	LOC729960			ITPR1						ETNK1	KSR1			_x000D_
	LOC729964			ASH1L						ETS1	VTN			_x000D_
	LOC729970			ZNF740						ETV5	AC005562.1			_x000D_
	LOC729978			MED13						ETV6	LRRC37BP1			_x000D_
	LOC729992			CDK12						EVC	SUZ12P1			_x000D_
	LOC730004			TNFRSF10A						EVI5	AC138207.8			_x000D_
	LOC730020			PDP2						EVI5L	OMG			_x000D_
	LOC730029			FAM107B						EVL	SLFN11			_x000D_
	LOC730041			ZFP1						EWSR1	AC060766.3			_x000D_
	LOC730052			CPEB4						EXD2	AC060766.6			_x000D_
	LOC730074			DCUN1D2						EXOC1	AC060766.1			_x000D_
	LOC730101			MLH3						EXOC2	SLFN13			_x000D_
	LOC730107			KBTBD3						EXOC3	SNHG30			_x000D_
	LOC730153			SNCA						EXOC4	AC233699.1			_x000D_
	LOC730167			IGF2						EXOC5	TBC1D3L			_x000D_
	LOC730173			GCFC2						EXOC7	NPEPPSP1			_x000D_
	LOC730176			MOCS3						EXOSC1	SOCS7			_x000D_
	LOC730187			CPNE8						EXOSC10	AC244153.1			_x000D_
	LOC730246			KDM5A						EXOSC2	SNORA21B			_x000D_
	LOC730255			ITGA6						EXOSC3	KRT17			_x000D_
	LOC730278			LRRN4						EXOSC4	P3H4			_x000D_
	LOC730288			ARPC4-TTLL3						EXOSC5	AC125257.1			_x000D_
	LOC730313			PCBD2						EXOSC6	KLHL11			_x000D_
	LOC730316			SENP1						EXOSC7	CAVIN1			_x000D_
	LOC730323			SEPSECS						EXOSC8	RETREG3			_x000D_
	LOC730324			FDXACB1						EXOSC9	RAMP2			_x000D_
	LOC730358			ZNF117						EXT1	AC109326.1			_x000D_
	LOC730382			AGO3						EXT2	LINC02210			_x000D_
	LOC730417			SPATA5						EXTL2	KANSL1-AS1			_x000D_
	LOC730432			CARD8						EXTL3	LRRC37A2			_x000D_
	LOC730455			ANKRD36						EZH2	AC005670.3			_x000D_
	LOC730534			HARBI1						EZR	EFCAB13			_x000D_
	LOC730740			SFR1						F3	MRPL45P2			_x000D_
	LOC730744			ERCC6						F8A1	AC018521.5			_x000D_
	LOC730754			CCDC8						FABP5	AC103702.1			_x000D_
	LOC730820			DPH6						FADD	ATP5MC1			_x000D_
	LOC730990			MSMO1						FADS1	EIF4EP2			_x000D_
	LOC730993			ZNF623						FADS2	TMEM100			_x000D_
	LOC730994			KANSL1L						FADS3	DGKE			_x000D_
	LOC730996			DENND1B						FAF1	AC015813.1			_x000D_
	LOC731049			USP40						FAF2	SEPTIN4			_x000D_
	LOC731096			ZNF429						FAH	U3			_x000D_
	LOC731314			ZKSCAN5						FAHD1	VMP1			_x000D_
	LOC731365			TMEM107						FAHD2A	WFDC21P			_x000D_
	LOC731542			GPR155						FAIM	TBX2-AS1			_x000D_
	LOC731640			CCNT1						FAM102A	TBX4			_x000D_
	LOC731751			KAT6B						FAM102B	BRIP1			_x000D_
	LOC731777			FGFR4						FAM104A	AC080038.1			_x000D_
	LOC731779			CWC27						FAM110B	AC046185.3			_x000D_
	LOC731878			STXBP4						FAM111A	SNHG25			_x000D_
	LOC731895			VPS9D1						FAM114A1	MILR1			_x000D_
	LOC731950			JRKL						FAM117B	ARHGAP27P1-BPTFP1-KPNA2P3			_x000D_
	LOC731985			MAP10						FAM118B	PLEKHM1P1			_x000D_
	LOC731999			TMEM242						FAM120A	AMZ2P1			_x000D_
	LOC732007			THAP5						FAM120AOS	LINC00674			_x000D_
	LOC732165			XRRA1						FAM120B	AC005332.6			_x000D_
	LOC732172			SMIM19						FAM122A	AC005332.3			_x000D_
	LOC732360			AGAP1						FAM122B	FAM20A			_x000D_
	LOC732425			ST3GAL2						FAM126B	ABCA8			_x000D_
	LOC732432			ARHGAP26						FAM131A	ABCA9			_x000D_
	LOC791120			FAM76A						FAM133B	ABCA6			_x000D_
	LOC88523			UBE2K						FAM136A	MAP2K6			_x000D_
	LOC90120			REV3L						FAM13A	MRPL58			_x000D_
	LOC90586			ADAMTSL5						FAM13B	ATP5PD			_x000D_
	LOC91561			PACRGL						FAM149B1	JPT1			_x000D_
	LOC92249			ZNF121						FAM156A	TMEM94			_x000D_
	LOC92659			KANSL1						FAM160A2	MYO15B			_x000D_
	LOC92755			KDM2B						FAM160B1	H3-3B			_x000D_
	LOC93622			ZNF611						FAM160B2	TEN1-CDK3			_x000D_
	LOC96610			HMGA2						FAM168B	SNHG16			_x000D_
	LRAP			SLC22A5						FAM171A1	SRSF2			_x000D_
	LRDD			NAPEPLD						FAM172A	SNHG20			_x000D_
	LRRC16			FUOM						FAM174A	SCARNA16			_x000D_
	LRRC37B2			ZNF688						FAM177A1	SEPTIN9			_x000D_
	M6PRBP1			ZNF574						FAM189B	CBX2			_x000D_
	MAGEL2			ADORA2B						FAM193A	BAIAP2-DT			_x000D_
	Magmas			SATB1						FAM20B	CEP131			_x000D_
	MAK10			HVCN1						FAM20C	TEPSIN			_x000D_
	MAP2K1IP1			METTL18						FAM32A	NDUFAF8			_x000D_
	MAP3K7IP1			ZNF57						FAM3A	FAAP100			_x000D_
	MAP3K7IP2			A1BG						FAM3C	MCRIP1			_x000D_
	MAPBPIP			NXPH4						FAM50A	AC145207.9			_x000D_
	MCART1			ZFP30						FAM53B	MAFG-DT			_x000D_
	MCHR2			SAMD8						FAM53C	CENPX			_x000D_
	METT11D1			ZNF334						FAM76B	HEXD			_x000D_
	METT5D1			NRF1						FAM89B	CYBC1			_x000D_
	METTL11A			RECQL4						FAM8A1	DLGAP1-AS1			_x000D_
	MGC10997			ZNF484						FAM91A1	LINC00667			_x000D_
	MGC15763			HOXB6						FAM98A	MTCL1			_x000D_
	MGC16121			AMBRA1						FAM98C	APCDD1			_x000D_
	MGC16169			AP1AR						FANCE	PIEZO2			_x000D_
	MGC16703			KLC2						FANCG	PRELID3A			_x000D_
	MGC18216			TMEM161B						FANCL	LDLRAD4			_x000D_
	MGC26356			ABHD11						FAR1	GATA6-AS1			_x000D_
	MGC2752			SCAF4						FARP1	RMC1			_x000D_
	MGC3032			TAB3						FARS2	ZNF521			_x000D_
	MGC3196			GBP3						FARSA	AC006249.1			_x000D_
	MGC3731			TRAF3						FAS	GAREM1			_x000D_
	MGC39900			SCLY						FASN	ZNF271P			_x000D_
	MGC40489			SEC61A2						FASTK	KIAA1328			_x000D_
	MGC4677			HECTD4						FASTKD1	SYT4			_x000D_
	MGC5139			BAHCC1						FASTKD2	ATP5F1A			_x000D_
	MGC52000			HR						FASTKD3	AC012254.2			_x000D_
	MGC70857			UNK						FASTKD5	RPL17-C18orf32			_x000D_
	MGC70863			MAGED4						FAT1	SNHG22			_x000D_
	MGC71993			C1R						FAU	SNORA37			_x000D_
	MGC72080			TMEM223						FBL	NARS1			_x000D_
	MGC72104			TBRG1						FBLIM1	AC027097.1			_x000D_
	MGC87042			CAPS						FBLN1	RNF152			_x000D_
	MGC87895			WDR3						FBN1	RELCH			_x000D_
	MIR1185-1			SPPL3						FBRS	CCDC102B			_x000D_
	MIR1228			ETS2						FBXL12	DOK6			_x000D_
	MIR125B2			FAM214A						FBXL15	CD226			_x000D_
	MIR129-2			ATF7IP						FBXL18	ZNF516			_x000D_
	MIR185			BRD4						FBXL2	ZNF236			_x000D_
	MIR1978			FAM217B						FBXL20	AC068473.5			_x000D_
	MIR300			PPP1R13B						FBXL3	SLC66A2			_x000D_
	MIR345			ADPRM						FBXL5	LINC01002			_x000D_
	MIR488			SPINT2						FBXL6	AC016588.2			_x000D_
	MIR586			PBXIP1						FBXO11	PLPP2			_x000D_
	MLL			C18orf32						FBXO17	PLPPR3			_x000D_
	MLL3			SLC52A2						FBXO21	CFD			_x000D_
	MLL4			UBE2B						FBXO22	CBARP			_x000D_
	MLL5			PPID						FBXO28	ATP5F1D			_x000D_
	MMS19L			LAMTOR5						FBXO3	FAM174C			_x000D_
	MOBK1B			LAMTOR1						FBXO30	PWWP3A			_x000D_
	MOBKL1A			POC1A						FBXO31	AC027307.2			_x000D_
	MOBKL1B			KCTD7						FBXO32	AC005943.1			_x000D_
	MOBKL2A			CCAR1						FBXO33	TLE5			_x000D_
	MOBKL2C			NFKBIE						FBXO34	YJU2			_x000D_
	MOBKL3			TAB2						FBXO38	HDGFL2			_x000D_
	MRLC2			ZSCAN29						FBXO4	MYDGF			_x000D_
	MSL3L1			ATP7A						FBXO42	MICOS13			_x000D_
	MTE			SPIRE2						FBXO46	INSR			_x000D_
	MTMR15			LPAR6						FBXO5	PET100			_x000D_
	MTP18			TRMT6						FBXO6	RAB11B-AS1			_x000D_
	MUDENG			TAF3						FBXO7	MARCHF2			_x000D_
	MUTED			TDRP						FBXO8	ADAMTS10			_x000D_
	MYO3B			KDM6A						FBXO9	ZNF699			_x000D_
	MYST1			THEM4						FBXW11	ZNF561-AS1			_x000D_
	MYST3			TMEM65						FBXW2	ZNF846			_x000D_
	NACAP1			PTCD3						FBXW4	OLFM2			_x000D_
	NAG18			ACTA1						FBXW5	COL5A3			_x000D_
	NARG1			PRKAR1B						FBXW7	SHFL			_x000D_
	NARG1L			FKBP8						FBXW9	FDX2			_x000D_
	NAT12			COX11						FCF1	S1PR5			_x000D_
	NAT13			HILPDA						FCGRT	ILF3-DT			_x000D_
	NAT15			TSHZ3						FCHSD2	TIMM29			_x000D_
	NAT5			NPAT						FDFT1	RAB3D			_x000D_
	NBPF20			PARD6G						FDPS	PLPPR2			_x000D_
	NCRNA00085			TLR4						FECH	ZNF491			_x000D_
	NCRNA00087			ADAMTS2						FEM1B	ZNF439			_x000D_
	NCRNA00094			SMIM20						FEM1C	ZNF433-AS1			_x000D_
	NCRNA00200			CHD2						FEN1	ZNF844			_x000D_
	NCRNA00219			DTX4						FER	ZNF788P			_x000D_
	NEFH			PEAK1						FERMT2	ZNF625-ZNF20			_x000D_
	NELF			SMIM7						FES	AC022415.1			_x000D_
	NGF			FARP2						FEZ2	ZNF625			_x000D_
	NIP30			OSER1						FGD1	ZNF44			_x000D_
	NLRP8			RMND5A						FGF2	ZNF563			_x000D_
	NMNAT2			KNSTRN						FGFR1OP2	ZNF442			_x000D_
	NOLA1			CDC27						FGFRL1	AC010422.6			_x000D_
	NOTCH2NL			SMIM14						FGGY	RPL10P16			_x000D_
	NP			LYRM9						FH	AC010422.3			_x000D_
	N-PAC			CHST11						FHL1	TRIR			_x000D_
	NPAL3			TBC1D12						FHL2	GET3			_x000D_
	NPIP			EXO5						FHL3	MIR23AHG			_x000D_
	NPY5R			PDIA3						FHOD1	ADGRL1			_x000D_
	NR4A2			HDAC4						FIBCD1	ADGRE5			_x000D_
	NSBP1			AP5M1						FIBP	RPL23AP2			_x000D_
	NSUN5B			SLC2A8						FICD	C19orf44			_x000D_
	NSUN5C			SMIM4						FIG4	AC024075.2			_x000D_
	NT5C3			PIN4						FIGNL1	ANO8			_x000D_
	NT5C3L			NAA25						FILIP1L	BST2			_x000D_
	NY-REN-7			UFL1						FIP1L1	AC010618.3			_x000D_
	OBFC2A			KDM4B						FIS1	SNORA68			_x000D_
	OBFC2B			CEP57						FIZ1	REX1BD			_x000D_
	ODZ3			ACAP3						FJX1	BORCS8-MEF2B			_x000D_
	ODZ4			KIN						FKBP10	BORCS8			_x000D_
	OKL38			NOA1						FKBP11	CILP2			_x000D_
	OR7E156P			U2SURP						FKBP14	ZNF101			_x000D_
	OR9A4			CABLES2						FKBP15	LINC00663			_x000D_
	ORC2L			CPE						FKBP1A	ZNF506			_x000D_
	ORC3L			DIMT1						FKBP1B	AC011477.1			_x000D_
	ORC5L			FMR1						FKBP2	AC011447.3			_x000D_
	ORC6L			RNF207						FKBP3	ZNF826P			_x000D_
	OSAP			ITGA2						FKBP4	ZNF737			_x000D_
	OSTCL			ALMS1						FKBP5	ZNF714			_x000D_
	P15RS			ZNRF2						FKRP	ZNF493			_x000D_
	P704P			CEP120						FKTN	ZNF100			_x000D_
	P76			ZNF292						FLAD1	AC074135.1			_x000D_
	PABPC5			TTLL7						FLII	ZNF724			_x000D_
	PAPD1			PTCH1						FLNA	IPO5P1			_x000D_
	PATE2			TEX30						FLNB	ZNF675			_x000D_
	PATE3			ETAA1						FLNC	RPSAP58			_x000D_
	PCDHB19P			NAA15						FLOT1	AC092279.1			_x000D_
	PDE4C			LIN7C						FLOT2	LINC00662			_x000D_
	PDIA3P			CWC25						FLYWCH2	AC006504.5			_x000D_
	PECI			ATP11A						FMNL2	FAAP24			_x000D_
	PET112L			GORAB						FN1	AC008738.7			_x000D_
	PFAAP5			FRS2						FN3KRP	GARRE1			_x000D_
	PFTK1			TEAD1						FNBP1	FXYD1			_x000D_
	PGAM4			INIP						FNBP1L	TMEM147-AS1			_x000D_
	PGBD3			NTPCR						FNBP4	HAUS5			_x000D_
	PGCP			ATR						FNDC3A	AD000671.1			_x000D_
	PHCA			TENM4						FNDC3B	HSPB6			_x000D_
	PIK4CA			ZNF10						FNDC4	PROSER3			_x000D_
	PIP3-E			RUFY2						FNIP1	COX7A1			_x000D_
	PIP5K2A			UXS1						FNIP2	LINC00665			_x000D_
	PIP5K2B			CTPS1						FNTA	ZNF529-AS1			_x000D_
	PIPSL			SBNO1						FOSL1	ZNF850			_x000D_
	PKM2			GGACT						FOSL2	ZNF790-AS1			_x000D_
	PLA2G2D			CNST						FOXD1	ZNF345			_x000D_
[truncated: 4,638 more rows]

## Sheet: B_GO_301_AF_MSC
GOID	Pvalue	OddsRatio	ExpCount	Count	Size	Term	GO_type	genes_x000D_
GO:0099537	7.48836e-06	3.0255	8.71887	24	698	trans-synaptic signaling	GO_BP	ACHE,ASIC1,CHRM3,CHRNA3,CHRNA4,CLSTN2,CNIH3,CPNE6,CSPG5,DAGLA,DGKB,FAM107A,GRIN2D,HTR1D,IL1B,KCNMB4,KCNQ3,NETO1,OPRM1,PCDHB10,PPFIA2,RIMS2,SYT8,TNF_x000D_
GO:0032501	1.2017e-05	1.78022	90.287	122	7361	multicellular organismal process	GO_BP	ABCC8,ACHE,ADAMTS16,AK8,APC2,APOA5,AQP11,ARHGAP33,ARHGEF15,ARMC4,ASIC1,ATP1A3,AZGP1,BAAT,BANK1,BSX,CCIN,CDK5R1,CHRM3,CHRNA3,CHRNA4,CLSTN2,COL20A1,CPNE6,CPNE9,CSF1R,CSF2,CSPG5,DAGLA,DGKB,DNAI1,EBI3,ECSCR,EPHA1,EPPK1,EPS8L3,EYA2,FAM107A,FERMT3,FGFR3,FOLR2,FOLR3,FOXL2,FOXQ1,GHRHR,GPR37L1,GRIN2D,HAPLN2,HDAC9,HNF4A,HOXD1,HTR1D,HUNK,IGKC,IL1B,IL34,ILDR2,JPH1,KCNC1,KCNJ8,KCNMB4,KIF1A,KRT14,KRT15,KRT33B,…
GO:0032502	2.08179e-05	1.74891	77.5954	108	6212	developmental process	GO_BP	ABCC8,ACHE,ADAMTS16,AK8,APC2,APOA5,AQP11,ARHGAP33,ARHGEF15,ARMC4,BAAT,BSX,C15orf62,CCIN,CDK5R1,CHRM3,CHRNA3,CLSTN2,COL20A1,CPNE6,CPNE9,CSF1R,CSF2,CSPG5,DAGLA,DNAI1,ECSCR,EPHA1,EPPK1,EYA2,FERMT3,FGFR3,FOXL2,FOXQ1,GHRHR,GPR37L1,GRIN2D,HAPLN2,HDAC9,HNF4A,HOXD1,HUNK,IL1B,IL34,ILDR2,JPH1,KCNC1,KCNJ8,KIF1A,KRT14,KRT15,KRT33B,KRT34,KRT80,KRT84,KRTAP2-3,KRTAP20-2,LCP1,MAMSTR,MEGF10,MEOX1,MOBP,MOG,MYBPC1,…
GO:2001240	6.96333e-05	13.4454	0.437192	5	35	negative regulation of extrinsic apoptotic signaling pathway in absence of ligand	GO_BP	CSF2,EYA2,IL1B,TERT,TNF_x000D_
GO:0034765	0.000198262	3.0284	5.67101	16	454	regulation of ion transmembrane transport	GO_BP	ABCC8,CNIH3,CTSS,JPH1,KCNC1,KCNJ4,KCNJ8,KCNQ3,NETO1,OPRM1,PTAFR,RAMP3,SCN5A,SLC34A1,TMC2,WNK4_x000D_
GO:0032879	0.000200156	1.80823	34.3009	55	2746	regulation of localization	GO_BP	ABCC8,ACHE,APOA5,ARMC4,ASIC1,BANK1,CALY,CDK5R1,CHRNA3,CHRNA4,CNIH3,CSF1R,CSPG5,CTSS,DAPK2,EPHA1,EPPK1,FAM107A,FERMT3,FOXL2,FRMD5,GHRHR,HDAC9,HNF4A,HSPA1L,IL1B,JPH1,KCNC1,KCNJ4,KCNJ8,KCNMB4,KCNQ3,LCP1,NETO1,NOG,OPRM1,PAX6,PPFIA2,PTAFR,PTPRR,RAB25,RAMP3,RASGRP1,RIMS2,SCN5A,SCT,SLC34A1,SYT8,TERT,TIAM1,TLR2,TMC2,TNF,UCN3,WNK4_x000D_
GO:1905144	0.000285711	14.6095	0.324772	4	26	response to acetylcholine	GO_BP	CDK5R1,CHRM3,CHRNA3,CHRNA4_x000D_
GO:0071803	0.000294776	30.023	0.137403	3	11	positive regulation of podosome assembly	GO_BP	CSF2,LCP1,TNF_x000D_
GO:0099587	0.000431989	6.73704	0.974315	6	78	inorganic ion import across plasma membrane	GO_BP	ABCC9,ATP1A3,KCNJ4,KCNJ8,RAMP3,SLC34A1_x000D_
GO:0046136	0.000462242	159.485	0.0374736	2	3	positive regulation of vitamin metabolic process	GO_BP	IL1B,TNF_x000D_
GO:0060559	0.000462242	159.485	0.0374736	2	3	positive regulation of calcidiol 1-monooxygenase activity	GO_BP	IL1B,TNF_x000D_
GO:0051046	0.000466964	2.6962	6.74944	17	553	regulation of secretion	GO_BP	ABCC8,ACHE,ASIC1,BANK1,CHRNA3,CHRNA4,CSF1R,CSPG5,FOXL2,GHRHR,HNF4A,IL1B,KCNMB4,OPRM1,PPFIA2,PTAFR,RASGRP1,RIMS2,SCT,SYT8,TIAM1,TLR2,TNF,UCN3,WNK4_x000D_
GO:0098655	0.000494396	2.35177	10.0514	22	811	cation transmembrane transport	GO_BP	ABCC8,ABCC9,ASIC1,ATP1A3,CNIH3,CTSS,GRIN2D,JPH1,KCNC1,KCNJ4,KCNJ8,KCNMB4,KCNQ3,NETO1,OPRM1,OTOP2,PKD2L2,RAMP3,RHCG,RHD,SCN5A,SLC34A1,TMC2,WNK4_x000D_
GO:0032823	0.000632512	21.8313	0.174877	3	14	regulation of natural killer cell differentiation	GO_BP	PGLYRP2,PGLYRP4,RASGRP1_x000D_
GO:0009914	0.000649679	3.23684	3.94722	12	316	hormone transport	GO_BP	ABCC8,CHRNA3,FOXL2,GHRHR,HNF4A,IL1B,ILDR2,RIMS2,SCT,TIAM1,TNF,UCN3_x000D_
GO:0023061	0.000788712	3.36377	3.48019	11	286	signal release	GO_BP	ABCC8,ASIC1,CHRNA3,CHRNA4,CSPG5,FOXL2,GHRHR,HNF4A,IL1B,ILDR2,KCNMB4,OPRM1,PPFIA2,RIMS2,SCT,SYT8,TIAM1,TNF,UCN3_x000D_
GO:0071242	0.000810909	7.52521	0.730798	5	59	cellular response to ammonium ion	GO_BP	CDK5R1,CHRM3,CHRNA3,CHRNA4,OPRM1,PTAFR,SLC34A1_x000D_
GO:0048513	0.000826389	1.64394	43.1571	63	3455	animal organ development	GO_BP	ACHE,ADAMTS16,AK8,AQP11,ARHGEF15,ARMC4,BAAT,BSX,CDK5R1,COL20A1,CSF1R,CSF2,FGFR3,FOXL2,FOXQ1,GHRHR,GPR37L1,GRIN2D,HDAC9,HNF4A,IL1B,IL34,ILDR2,JPH1,KCNC1,KCNJ8,KIF1A,KRT14,KRT15,KRT33B,KRT34,KRT80,KRT84,KRTAP2-3,KRTAP20-2,LCP1,MEGF10,MEOX1,MYBPC1,NFATC2,NOG,PAX6,PGLYRP2,PGLYRP4,PHOX2B,PTCHD1,RARB,RASGRP1,RP1L1,RTN4R,SCN5A,SCT,SLC34A1,SP6,TIAM1,TLL2,TLR2,TNF,TRIM10,UMODL1,WNK4,XDH,ZNF365_x000D_
GO:0032827	0.000916859	79.738	0.0499649	2	4	negative regulation of natural killer cell differentiation involved in immune response	GO_BP	PGLYRP2,PGLYRP4_x000D_
GO:0030072	0.00102536	3.4861	3.04786	10	244	peptide hormone secretion	GO_BP	ABCC8,GHRHR,HNF4A,IL1B,ILDR2,RIMS2,SCT,TIAM1,TNF,UCN3_x000D_
GO:0032870	0.00116119	2.3387	8.65641	19	693	cellular response to hormone stimulus	GO_BP	ATP1A3,CDK5R1,CHRM3,CHRNA3,CHRNA4,CPEB1,CTSS,FAM107A,GHRHR,HDAC9,HNF4A,IL1B,NPFFR2,RAMP3,RARB,SLC34A1,UCN2,UCN3,UMODL1_x000D_
GO:0099643	0.00121367	4.0845	2.08603	8	167	signal release from synapse	GO_BP	ASIC1,CHRNA3,CHRNA4,CSPG5,KCNMB4,PPFIA2,RIMS2,SYT8_x000D_
GO:0007154	0.00131198	1.51122	81.4677	104	6522	cell communication	GO_BP	ABCC8,ACHE,APC2,ARHGAP33,ARHGAP9,ARHGEF15,ASB18,ASIC1,ATP1A3,BANK1,C15orf62,CALML6,CALY,CDK5R1,CHRM3,CHRNA3,CHRNA4,CLSTN2,CNIH3,CPNE6,CREB3L3,CSF1R,CSF2,CSPG5,CTSS,DAGLA,DAPK2,DGKB,DIRAS1,EBI3,EPHA1,EPS8L3,EYA2,FAM107A,FERMT3,FGFR3,FOLR2,FOXL2,GHRHR,GPHA2,GPR151,GPR37L1,GRIN2D,HLA-DQA1,HNF4A,HTR1D,HUNK,ICOSLG,IGKC,IL1B,IL34,ILDR2,JPH1,KCNMB4,KCNQ3,LAT,LCP1,LILRB5,LURAP1,MOG,MUC21,NETO1,NFATC2,NOG…
GO:0098581	0.00136658	16.0061	0.224842	3	18	detection of external biotic stimulus	GO_BP	PGLYRP2,PGLYRP4,TLR2_x000D_
GO:1990573	0.00152345	8.92119	0.499649	4	40	potassium ion import across plasma membrane	GO_BP	ABCC9,ATP1A3,KCNJ4,KCNJ8_x000D_
GO:0023052	0.00155312	1.50153	80.8806	103	6475	signaling	GO_BP	ABCC8,ACHE,APC2,ARHGAP33,ARHGAP9,ARHGEF15,ASB18,ASIC1,ATP1A3,BANK1,C15orf62,CALML6,CALY,CDK5R1,CHRM3,CHRNA3,CHRNA4,CLSTN2,CNIH3,CPNE6,CREB3L3,CSF1R,CSF2,CSPG5,CTSS,DAGLA,DAPK2,DGKB,DIRAS1,EBI3,EPHA1,EPS8L3,EYA2,FAM107A,FERMT3,FGFR3,FOXL2,GHRHR,GPHA2,GPR151,GPR37L1,GRIN2D,HLA-DQA1,HNF4A,HTR1D,HUNK,ICOSLG,IGKC,IL1B,IL34,ILDR2,JPH1,KCNMB4,KCNQ3,LAT,LCP1,LILRB5,LURAP1,MOG,MUC21,NETO1,NFATC2,NOG,NPFFR…
GO:0038034	0.00194077	6.09949	0.886876	5	71	signal transduction in absence of ligand	GO_BP	CSF2,EYA2,IL1B,TERT,TNF_x000D_
GO:1903861	0.00216674	13.3363	0.262315	3	21	positive regulation of dendrite extension	GO_BP	CPNE6,CPNE9,RIMS2_x000D_
GO:0030154	0.00234394	1.59176	40.7113	58	3362	cell differentiation	GO_BP	ABCC8,ACHE,APC2,ARHGAP33,CCIN,CDK5R1,CHRNA3,COL20A1,CPNE6,CPNE9,CSF1R,CSF2,CSPG5,DAGLA,ECSCR,EPHA1,EYA2,FERMT3,FGFR3,FOXL2,FOXQ1,GHRHR,GPR37L1,HAPLN2,HDAC9,HNF4A,HOXD1,IL1B,IL34,ILDR2,KRT14,KRT15,KRT33B,KRT34,KRT80,KRT84,KRTAP2-3,KRTAP20-2,MAMSTR,MEGF10,MEOX1,MYBPC1,MYO7B,NFATC2,NOG,NRN1L,OPRM1,PAX6,PGLYRP2,PGLYRP4,PHOX2B,RAB25,RARB,RASGRP1,RHCG,RIMS2,RP1L1,RTN4R,SHC4,SSPO,STRA8,TDRKH,TENM2,TERT,…
GO:0070268	0.00283441	4.56755	1.39902	6	112	cornification	GO_BP	KRT14,KRT15,KRT33B,KRT34,KRT80,KRT84_x000D_
GO:0034764	0.00290898	3.52466	2.39831	8	192	positive regulation of transmembrane transport	GO_BP	ABCC8,CTSS,KCNC1,PTAFR,RAMP3,SLC34A1,TERT,WNK4_x000D_
GO:0003360	0.00313041	31.89	0.0874385	2	7	brainstem development	GO_BP	PHOX2B,SCN5A_x000D_
GO:0009253	0.00313041	31.89	0.0874385	2	7	peptidoglycan catabolic process	GO_BP	PGLYRP2,PGLYRP4_x000D_
GO:0031622	0.00313041	31.89	0.0874385	2	7	positive regulation of fever generation	GO_BP	IL1B,TNF_x000D_
GO:0035095	0.00313041	31.89	0.0874385	2	7	behavioral response to nicotine	GO_BP	CHRNA3,CHRNA4_x000D_
GO:0045110	0.00313041	31.89	0.0874385	2	7	intermediate filament bundle assembly	GO_BP	EPPK1,KRT14_x000D_
GO:0099505	0.00313041	31.89	0.0874385	2	7	regulation of presynaptic membrane potential	GO_BP	ATP1A3,KCNC1_x000D_
GO:1903795	0.00313041	31.89	0.0874385	2	7	regulation of inorganic anion transmembrane transport	GO_BP	PTAFR,SLC34A1_x000D_
GO:0071277	0.00327375	5.3649	0.999297	5	80	cellular response to calcium ion	GO_BP	ALOX5AP,CPNE6,CPNE9,SCN5A,SYT8_x000D_
GO:0044057	0.00337943	2.5197	5.43896	13	442	regulation of system process	GO_BP	ABCC8,APOA5,ATP1A3,CHRM3,CHRNA3,FOXL2,GRIN2D,IL1B,KCNMB4,NETO1,OPRM1,PHOX2B,PTAFR,RIMS2,SCN5A,SCT,TNNT3,WNK4_x000D_
GO:0022898	0.00377085	3.09654	3.06035	9	245	regulation of transmembrane transporter activity	GO_BP	ABCC8,CNIH3,CTSS,JPH1,KCNC1,NETO1,OPRM1,PTAFR,WNK4_x000D_
GO:0007417	0.00391445	1.97067	11.8417	22	948	central nervous system development	GO_BP	AK8,ARMC4,CDK5R1,CSF1R,GHRHR,GPR37L1,GRIN2D,HAPLN2,KCNC1,KIF1A,MOG,NOG,PAX6,PHOX2B,PTCHD1,RARB,RTN4R,SCN5A,SCT,TLR2,TNF,ZNF365_x000D_
GO:0095500	0.00407757	26.7841	0.099161	2	8	acetylcholine receptor signaling pathway	GO_BP	CDK5R1,CHRM3,CHRNA3,CHRNA4_x000D_
GO:0016045	0.00410638	26.6857	0.0995186	2	8	detection of bacterium	GO_BP	PGLYRP2,PGLYRP4,TLR2_x000D_
GO:0015884	0.00413959	26.5735	0.0999297	2	8	folic acid transport	GO_BP	FOLR2,FOLR3_x000D_
GO:0032815	0.00413959	26.5735	0.0999297	2	8	negative regulation of natural killer cell activation	GO_BP	PGLYRP2,PGLYRP4_x000D_
GO:1903961	0.00413959	26.5735	0.0999297	2	8	positive regulation of anion transmembrane transport	GO_BP	PTAFR,SLC34A1_x000D_
GO:1990138	0.00416528	3.67451	2.01109	7	161	neuron projection extension	GO_BP	CDK5R1,CPNE6,CPNE9,NRN1L,RIMS2,RTN4R,TIAM1_x000D_
GO:0042391	0.00422455	2.55513	4.94039	12	402	regulation of membrane potential	GO_BP	ASIC1,ATP1A3,CHRNA3,CHRNA4,CNIH3,GRIN2D,KCNC1,KCNJ8,KCNMB4,KCNQ3,NETO1,OPRM1,RIMS2,SCN5A,SLC34A1,UCN3_x000D_
GO:0007271	0.00445697	10.0424	0.335839	3	27	synaptic transmission, cholinergic	GO_BP	ACHE,CHRM3,CHRNA3,CHRNA4_x000D_
GO:0010469	0.00460443	2.2618	6.98259	15	559	regulation of signaling receptor activity	GO_BP	CNIH3,CSF2,CSPG5,EBI3,GPHA2,IL1B,IL34,NETO1,NOG,OPRM1,RAMP3,SCT,TNF,UCN2,UCN3_x000D_
GO:0007187	0.00501333	2.95683	3.19775	9	256	G protein-coupled receptor signaling pathway, coupled to cyclic nucleotide second messenger	GO_BP	CHRM3,GHRHR,GPHA2,GPR37L1,HTR1D,OPRM1,RAMP3,UCN2,UCN3_x000D_
GO:0046883	0.00513051	2.9457	3.2093	9	258	regulation of hormone secretion	GO_BP	ABCC8,CHRNA3,FOXL2,GHRHR,HNF4A,IL1B,SCT,TIAM1,TNF,UCN3_x000D_
GO:0055085	0.00522631	1.80011	15.9915	27	1318	transmembrane transport	GO_BP	ABCC8,ABCC9,AQP10,AQP11,ASIC1,ATP1A3,AZGP1,CHRNA3,CHRNA4,CNIH3,CTSS,FOLR2,GRIN2D,IL1B,JPH1,KCNC1,KCNJ4,KCNJ8,KCNMB4,KCNQ3,NETO1,OPRM1,OTOP2,PKD2L2,PTAFR,RAMP3,RHCG,RHD,SCN5A,SLC22A24,SLC34A1,SPNS3,TERT,TMC2,TNF,WNK4_x000D_
GO:0031663	0.00524225	6.17079	0.699508	4	56	lipopolysaccharide-mediated signaling pathway	GO_BP	IL1B,PTAFR,TLR2,TNF_x000D_
GO:0060556	0.00527866	22.776	0.112421	2	9	regulation of vitamin D biosynthetic process	GO_BP	IL1B,TNF_x000D_
GO:0043270	0.00553654	2.90907	3.24772	9	260	positive regulation of ion transport	GO_BP	ABCC8,CTSS,IL1B,KCNC1,PTAFR,RAMP3,SCN5A,SLC34A1,WNK4_x000D_
GO:0019935	0.00558022	3.14441	2.67312	8	214	cyclic-nucleotide-mediated signaling	GO_BP	GHRHR,GPHA2,OPRM1,RAMP3,RIMS2,SCT,UCN2,UCN3_x000D_
GO:0050807	0.00558022	3.14441	2.67312	8	214	regulation of synapse organization	GO_BP	ARHGAP33,ARHGEF15,CDK5R1,CLSTN2,DGKB,TIAM1,TLR2,TNF_x000D_
GO:0042108	0.00558364	6.05403	0.711999	4	57	positive regulation of cytokine biosynthetic process	GO_BP	EBI3,IL1B,PTAFR,TNF_x000D_
GO:0071805	0.00561442	3.46689	2.12518	7	172	potassium ion transmembrane transport	GO_BP	ABCC8,ABCC9,ATP1A3,KCNC1,KCNJ4,KCNJ8,KCNMB4,KCNQ3,NETO1,WNK4_x000D_
GO:0051962	0.00565225	2.27782	6.45796	14	517	positive regulation of nervous system development	GO_BP	CLSTN2,CPNE6,CPNE9,GPR37L1,IL1B,OPRM1,PAX6,PHOX2B,RARB,RIMS2,TIAM1,TLR2,TNF,ZNF365_x000D_
GO:0090630	0.0056725	4.67586	1.1367	5	91	activation of GTPase activity	GO_BP	ADPRH,APC2,EPHA1,RASGRP1,TIAM1_x000D_
GO:0006813	0.0061948	3.8552	1.64189	6	133	potassium ion transport	GO_BP	ABCC8,ABCC9,ATP1A3,KCNC1,KCNJ4,KCNJ8,KCNMB4,KCNQ3,NETO1,WNK4_x000D_
GO:0007589	0.00621391	4.56909	1.16168	5	93	body fluid secretion	GO_BP	CHRM3,GHRHR,SCT,WNK4,XDH_x000D_
GO:0098609	0.00667809	1.9717	10.1554	19	813	cell-cell adhesion	GO_BP	CDK5R1,CLSTN2,EBI3,ESAM,FERMT3,ICOSLG,IL1B,JAM2,MEGF10,MUC21,PCDH11X,PCDHA5,PCDHB10,PTAFR,RASGRP1,SELPLG,SIGLEC1,TENM2,TNF_x000D_
GO:0006836	0.00670899	2.81796	3.34765	9	268	neurotransmitter transport	GO_BP	ASIC1,CHRNA3,CHRNA4,CSF2,CSPG5,KCNMB4,PPFIA2,RIMS2,SYT8_x000D_
GO:0007586	0.00703264	3.74842	1.68631	6	135	digestion	GO_BP	APOA5,CHRM3,SCT,UCN2,UCN3,WNK4_x000D_
GO:0032414	0.00709261	4.41773	1.19916	5	96	positive regulation of ion transmembrane transporter activity	GO_BP	ABCC8,CTSS,KCNC1,PTAFR,WNK4_x000D_
GO:0060322	0.00710235	1.99818	9.48083	18	759	head development	GO_BP	AK8,ARMC4,CDK5R1,CSF1R,GHRHR,GPR37L1,GRIN2D,KCNC1,KIF1A,NOG,PAX6,PHOX2B,PTCHD1,RARB,RTN4R,SCN5A,SCT,ZNF365_x000D_
GO:0045685	0.00751376	5.53061	0.774455	4	62	regulation of glial cell differentiation	GO_BP	GPR37L1,NOG,TLR2,ZNF365_x000D_
GO:0051234	0.00751398	1.42146	64.692	82	5179	establishment of localization	GO_BP	ABCC8,ABCC9,ACHE,ADPRH,AP3B2,APOA5,AQP10,AQP11,ARHGAP33,ARHGAP9,ASIC1,ATP1A3,AZGP1,BAAT,BANK1,CALY,CDK5R1,CEACAM3,CHRM3,CHRNA3,CHRNA4,CNIH3,CPNE6,CSF1R,CSF2,CSPG5,CTSS,EYA2,FERMT3,FOLR2,FOLR3,FOXL2,GHRHR,GRIN2D,HNF4A,HSPA1L,IGKC,IL1B,ILDR2,JPH1,KCNC1,KCNJ4,KCNJ8,KCNMB4,KCNQ3,KIF1A,LAT,LCP1,LMAN1L,MEGF10,NETO1,OPRM1,OTOP2,PAX6,PKD2L2,PPFIA2,PTAFR,RAB25,RAMP3,RASGRP1,RHCG,RHD,RIMS2,SCN5A,SCT,SIGLEC…
GO:0030900	0.00757977	2.46543	4.67171	11	374	forebrain development	GO_BP	CDK5R1,CSF1R,GHRHR,KCNC1,KIF1A,NOG,PAX6,PTCHD1,RARB,RTN4R,SCN5A_x000D_
GO:0032252	0.007933	17.7128	0.137403	2	11	secretory granule localization	GO_BP	KIF1A,RASGRP1_x000D_
GO:0048712	0.007933	17.7128	0.137403	2	11	negative regulation of astrocyte differentiation	GO_BP	GPR37L1,NOG_x000D_
GO:0032729	0.00794618	5.43657	0.786946	4	63	positive regulation of interferon-gamma production	GO_BP	EBI3,IL1B,RASGRP1,TNF_x000D_
GO:0060429	0.00803428	1.81696	13.3854	23	1087	epithelium development	GO_BP	ADAMTS16,AQP11,CSF1R,EPPK1,FOXL2,FOXQ1,HAPLN2,HNF4A,IL1B,KRT14,KRT15,KRT33B,KRT34,KRT80,KRT84,KRTAP2-3,KRTAP20-2,MEOX1,NOG,PAX6,RAB25,RARB,RHCG,TIAM1,TNF,UPK1B,WNK4,XDH_x000D_
GO:0007189	0.00807062	3.63489	1.73628	6	139	adenylate cyclase-activating G protein-coupled receptor signaling pathway	GO_BP	GHRHR,GPHA2,OPRM1,RAMP3,UCN2,UCN3_x000D_
GO:0042633	0.00846244	4.22154	1.2515	5	101	hair cycle	GO_BP	EPS8L3,FOXQ1,KRT14,KRT33B,KRT84,TERT,TNF_x000D_
GO:0007215	0.00851011	5.32172	0.802469	4	65	glutamate receptor signaling pathway	GO_BP	CDK5R1,CNIH3,DAGLA,GRIN2D,NETO1,OPRM1,TIAM1_x000D_
GO:0030224	0.00865452	7.73812	0.424701	3	34	monocyte differentiation	GO_BP	CSF1R,CSF2,IL34_x000D_
GO:0048048	0.00865452	7.73812	0.424701	3	34	embryonic eye morphogenesis	GO_BP	FOXL2,PAX6,RARB_x000D_
GO:0048566	0.00865452	7.73812	0.424701	3	34	embryonic digestive tract development	GO_BP	RARB,SCT,TNF_x000D_
GO:0048731	0.00876431	1.81994	13.5851	23	1222	system development	GO_BP	ABCC8,ACHE,ADAMTS16,AK8,AQP11,ARHGAP33,ARHGEF15,ARMC4,BAAT,BSX,CDK5R1,CHRM3,CHRNA3,CLSTN2,COL20A1,CPNE6,CPNE9,CSF1R,CSF2,CSPG5,DAGLA,ECSCR,EPHA1,FGFR3,FOXL2,FOXQ1,GHRHR,GPR37L1,GRIN2D,HAPLN2,HDAC9,HNF4A,HOXD1,IL1B,IL34,ILDR2,JPH1,KCNC1,KCNJ8,KIF1A,KRT14,KRT15,KRT33B,KRT34,KRT80,KRT84,KRTAP2-3,KRTAP20-2,LCP1,MEGF10,MEOX1,MOBP,MOG,MYBPC1,NFATC2,NOG,NRN1L,OPRM1,PAX6,PCDHA5,PCDHB10,PGLYRP2,PGLYRP4,PH…
GO:0001505	0.00936264	2.86255	2.9238	8	240	regulation of neurotransmitter levels	GO_BP	ACHE,ASIC1,BAAT,CHRNA3,CHRNA4,CSPG5,DAGLA,GLYAT,IL1B,KCNMB4,PPFIA2,RIMS2,SYT8,TLR2,TNF_x000D_
GO:0014831	0.00944171	15.9406	0.149895	2	12	gastro-intestinal system smooth muscle contraction	GO_BP	HTR1D,PTAFR_x000D_
GO:0036005	0.00944171	15.9406	0.149895	2	12	response to macrophage colony-stimulating factor	GO_BP	CSF1R,TLR2_x000D_
GO:0042635	0.00944171	15.9406	0.149895	2	12	positive regulation of hair cycle	GO_BP	TERT,TNF_x000D_
GO:1903140	0.00944171	15.9406	0.149895	2	12	regulation of establishment of endothelial barrier	GO_BP	IL1B,TNF_x000D_
GO:0009306	0.00948735	2.13361	6.87017	14	550	protein secretion	GO_BP	ABCC8,ACHE,BANK1,CSF1R,HNF4A,IL1B,ILDR2,OPRM1,RASGRP1,RIMS2,TIAM1,TLR2,TNF,UCN3_x000D_
GO:0031032	0.00976047	3.1044	2.36084	7	189	actomyosin structure organization	GO_BP	ARHGEF15,EPHA1,FHDC1,FRMD5,LURAP1,MYBPC1,TNNT3_x000D_
GO:0007155	0.00996684	2.1231	6.91878	14	577	cell adhesion	GO_BP	ACHE,AZGP1,CDK5R1,CLSTN2,EBI3,EPHA1,ESAM,FAM107A,FERMT3,FOLR2,FOLR3,FRMD5,HAPLN2,ICOSLG,IL1B,JAM2,MEGF10,MOG,MUC21,MYBPC1,PCDH11X,PCDHA5,PCDHB10,PDZD2,PPFIA2,PTAFR,RASGRP1,SELPLG,SIGLEC1,SSPO,TENM2,TIAM1,TNF_x000D_
GO:0051650	0.0109235	2.59416	3.62245	9	290	establishment of vesicle localization	GO_BP	AP3B2,CHRNA4,CNIH3,CSPG5,KIF1A,PPFIA2,RASGRP1,RIMS2,SYT8_x000D_
GO:0032941	0.0109346	7.05418	0.462175	3	37	secretion by tissue	GO_BP	CHRM3,SCT,WNK4_x000D_
GO:0031650	0.0110672	14.4907	0.162386	2	13	regulation of heat generation	GO_BP	IL1B,TNF_x000D_
GO:0032725	0.0110672	14.4907	0.162386	2	13	positive regulation of granulocyte macrophage colony-stimulating factor production	GO_BP	IL1B,RASGRP1_x000D_
GO:0090197	0.0110672	14.4907	0.162386	2	13	positive regulation of chemokine secretion	GO_BP	CSF1R,TNF_x000D_
GO:0048870	0.0114007	1.61251	21.0852	32	1688	cell motility	GO_BP	ABCC8,APC2,CDK5R1,CEACAM3,CSF1R,DAPK2,DNAI1,EPHA1,EPPK1,ESAM,FAM107A,FERMT3,FRMD5,HDAC9,IGKC,IL1B,JAM2,LCP1,LURAP1,MEGF10,NFATC2,NOG,PAX6,PHOX2B,PTAFR,PTPRR,RAB25,SELPLG,TCTE1,TERT,TIAM1,TNF_x000D_
GO:0051930	0.0126292	6.66155	0.487157	3	39	regulation of sensory perception of pain	GO_BP	GRIN2D,OPRM1,PTAFR_x000D_
GO:0009636	0.0126425	2.1184	6.40799	13	513	response to toxic substance	GO_BP	ALOX5AP,AQP10,ARHGAP33,ASIC1,CHRNA3,CHRNA4,GLYAT,GPR37L1,HDAC9,KCNC1,OPRM1,TLR2,TNF_x000D_
GO:0032352	0.0128063	13.2824	0.174877	2	14	positive regulation of hormone metabolic process	GO_BP	IL1B,TNF_x000D_
GO:0042362	0.0128063	13.2824	0.174877	2	14	fat-soluble vitamin biosynthetic process	GO_BP	IL1B,TNF_x000D_
GO:0150078	0.0128063	13.2824	0.174877	2	14	positive regulation of neuroinflammatory response	GO_BP	IL1B,TNF_x000D_
GO:0048489	0.0129515	3.26378	1.92365	6	154	synaptic vesicle transport	GO_BP	AP3B2,CHRNA4,CSPG5,PPFIA2,RIMS2,SYT8_x000D_
GO:0030216	0.0131272	2.5124	3.73487	9	299	keratinocyte differentiation	GO_BP	KRT14,KRT15,KRT33B,KRT34,KRT80,KRT84,KRTAP2-3,KRTAP20-2,PAX6_x000D_
GO:0032760	0.0131881	4.64611	0.911859	4	73	positive regulation of tumor necrosis factor production	GO_BP	ABCC8,PTAFR,RASGRP1,TLR2_x000D_
GO:0030225	0.0135297	6.48115	0.499649	3	40	macrophage differentiation	GO_BP	CSF1R,IL34,TLR2_x000D_
GO:0061001	0.0135297	6.48115	0.499649	3	40	regulation of dendritic spine morphogenesis	GO_BP	ARHGAP33,CDK5R1,TIAM1_x000D_
GO:1901381	0.0135297	6.48115	0.499649	3	40	positive regulation of potassium ion transmembrane transport	GO_BP	ABCC8,KCNC1,WNK4_x000D_
GO:0050896	0.0136838	1.46948	47.7214	61	4255	response to stimulus	GO_BP	ABCC8,ABCC9,ACHE,ALOX5AP,ANGPTL7,APC2,APOA5,AQP10,ARHGAP33,ARHGAP9,ARHGEF15,ASB18,ASIC1,ATP1A3,AZGP1,BAAT,BANK1,C15orf62,CALML6,CALY,CD300E,CDK5R1,CEACAM3,CHRM3,CHRNA3,CHRNA4,CNIH3,COL20A1,CPEB1,CPNE6,CPNE9,CREB3L3,CSF1R,CSF2,CSPG5,CTSS,CYP4B1,DAGLA,DAPK2,DEFB132,DGKB,DIRAS1,EBI3,ECSCR,EPHA1,EPPK1,EPS8L3,EYA2,FAM107A,FERMT3,FGFR3,FOLR2,FOLR3,GHRHR,GLYAT,GPHA2,GPR151,GPR37L1,GRIN2D,HDAC9,HLA-DQA1,…
GO:0002064	0.0136933	2.89535	2.52323	7	202	epithelial cell development	GO_BP	HAPLN2,HNF4A,IL1B,PAX6,RAB25,RARB,TNF_x000D_
GO:0022617	0.0138086	4.57948	0.92435	4	74	extracellular matrix disassembly	GO_BP	CTSS,LCP1,TLL1,TLL2_x000D_
GO:2000026	0.0141247	1.53709	25.6482	37	2062	regulation of multicellular organismal development	GO_BP	ABCC8,ARHGAP33,ARHGEF15,CDK5R1,CHRNA3,CLSTN2,CPNE6,CPNE9,CSF2,ECSCR,EPHA1,GPR37L1,HDAC9,HNF4A,IL1B,IL34,KRT84,MEGF10,NFATC2,NOG,OPRM1,PAX6,PGLYRP2,PGLYRP4,PHOX2B,RARB,RASGRP1,RIMS2,RTN4R,SP6,TERT,TIAM1,TLL2,TLR2,TNF,UMODL1,XDH,ZNF365_x000D_
GO:0097061	0.0144473	4.51474	0.936841	4	75	dendritic spine organization	GO_BP	ARHGAP33,CDK5R1,TIAM1,ZNF365_x000D_
GO:0030730	0.014656	12.26	0.187368	2	15	sequestering of triglyceride	GO_BP	IL1B,TNF_x000D_
GO:0034116	0.014656	12.26	0.187368	2	15	positive regulation of heterotypic cell-cell adhesion	GO_BP	IL1B,TNF_x000D_
GO:0035864	0.014656	12.26	0.187368	2	15	response to potassium ion	GO_BP	KCNC1,SLC34A1_x000D_
GO:0045838	0.014656	12.26	0.187368	2	15	positive regulation of membrane potential	GO_BP	SLC34A1,UCN3_x000D_
GO:0051044	0.014656	12.26	0.187368	2	15	positive regulation of membrane protein ectodomain proteolysis	GO_BP	IL1B,TNF_x000D_
GO:0060253	0.014656	12.26	0.187368	2	15	negative regulation of glial cell proliferation	GO_BP	ABCC8,TERT_x000D_
GO:1903818	0.014656	12.26	0.187368	2	15	positive regulation of voltage-gated potassium channel activity	GO_BP	ABCC8,KCNC1_x000D_
GO:2001257	0.0146818	3.16999	1.97783	6	159	regulation of cation channel activity	GO_BP	ABCC8,CNIH3,CTSS,JPH1,KCNC1,NETO1,OPRM1_x000D_
GO:0060079	0.0147452	4.48519	0.942489	4	76	excitatory postsynaptic potential	GO_BP	CHRNA3,CHRNA4,GRIN2D,NETO1,OPRM1,RIMS2_x000D_
GO:0002437	0.0154379	6.14811	0.524631	3	42	inflammatory response to antigenic stimulus	GO_BP	OPRM1,RASGRP1,TNF_x000D_
GO:0003416	0.0164458	5.99408	0.537122	3	43	endochondral bone growth	GO_BP	COL20A1,FGFR3,RARB_x000D_
GO:0021983	0.0164458	5.99408	0.537122	3	43	pituitary gland development	GO_BP	GHRHR,NOG,PAX6_x000D_
GO:0045601	0.0164458	5.99408	0.537122	3	43	regulation of endothelial cell differentiation	GO_BP	IL1B,TNF,XDH_x000D_
GO:0006544	0.0166132	11.3837	0.199859	2	16	glycine metabolic process	GO_BP	BAAT,GLYAT_x000D_
GO:0048791	0.0166132	11.3837	0.199859	2	16	calcium ion-regulated exocytosis of neurotransmitter	GO_BP	RIMS2,SYT8_x000D_
GO:0072488	0.0166132	11.3837	0.199859	2	16	ammonium transmembrane transport	GO_BP	RHCG,RHD_x000D_
GO:0006811	0.0171727	1.63452	16.7781	26	1378	ion transport	GO_BP	ABCC8,ABCC9,APOA5,ASIC1,ATP1A3,CHRNA3,CHRNA4,CNIH3,CSF2,CTSS,FOLR2,FOLR3,GRIN2D,IL1B,JPH1,KCNC1,KCNJ4,KCNJ8,KCNMB4,KCNQ3,NETO1,OPRM1,OTOP2,PKD2L2,PTAFR,RAMP3,RHCG,RHD,SCN5A,SLC22A24,SLC34A1,SLC52A1,SYT8,TMC2,WNK4_x000D_
GO:0022612	0.0174209	3.49115	1.49895	5	120	gland morphogenesis	GO_BP	BSX,CSF1R,NOG,PAX6,TNF_x000D_
GO:0047496	0.0174899	5.84756	0.549613	3	44	vesicle transport along microtubule	GO_BP	AP3B2,KIF1A,RASGRP1_x000D_
GO:0042493	0.0176597	1.74681	11.9972	20	976	response to drug	GO_BP	ABCC8,ABCC9,ASIC1,CDK5R1,CHRM3,CHRNA3,CHRNA4,CYP4B1,FOLR2,FOLR3,GPR37L1,HDAC9,IL1B,KCNC1,NFATC2,OPRM1,PTAFR,SLC34A1,SLC52A1,SPINK4,SYT8,TIAM1,TLR2,TNF_x000D_
GO:2000300	0.0179202	4.21655	0.999297	4	80	regulation of synaptic vesicle exocytosis	GO_BP	CHRNA4,CSPG5,PPFIA2,RIMS2_x000D_
GO:0046718	0.0179928	3.46086	1.51144	5	121	viral entry into host cell	GO_BP	MOG,SELPLG,SLC52A1,TMPRSS2,TRIM10_x000D_
GO:0002793	0.018557	2.5133	3.31017	8	265	positive regulation of peptide secretion	GO_BP	ACHE,CSF1R,GHRHR,RASGRP1,SCT,TLR2,TNF,UCN3_x000D_
GO:0014075	0.0185702	5.70802	0.562105	3	45	response to amine	GO_BP	ASIC1,HDAC9,KCNC1_x000D_
GO:0032755	0.0186717	4.16157	1.01179	4	81	positive regulation of interleukin-6 production	GO_BP	IL1B,PTAFR,TLR2,TNF_x000D_
GO:0097756	0.0186717	4.16157	1.01179	4	81	negative regulation of blood vessel diameter	GO_BP	CHRM3,HTR1D,KCNMB4,PTAFR_x000D_
GO:0007342	0.0186751	10.6242	0.212351	2	17	fusion of sperm to egg plasma membrane involved in single fertilization	GO_BP	FOLR2,FOLR3_x000D_
GO:0031268	0.0186751	10.6242	0.212351	2	17	pseudopodium organization	GO_BP	C15orf62,RAB25_x000D_
GO:0036158	0.0186751	10.6242	0.212351	2	17	outer dynein arm assembly	GO_BP	ARMC4,DNAI1_x000D_
GO:0044117	0.0186751	10.6242	0.212351	2	17	growth of symbiont in host	GO_BP	PGLYRP2,TNF_x000D_
GO:0045187	0.0186751	10.6242	0.212351	2	17	regulation of circadian sleep/wake cycle, sleep	GO_BP	CSF2,GHRHR_x000D_
GO:0048714	0.0186751	10.6242	0.212351	2	17	positive regulation of oligodendrocyte differentiation	GO_BP	TLR2,ZNF365_x000D_
GO:0060080	0.0186751	10.6242	0.212351	2	17	inhibitory postsynaptic potential	GO_BP	CHRNA4,RIMS2_x000D_
GO:1903532	0.019199	2.23116	4.65922	10	373	positive regulation of secretion by cell	GO_BP	ACHE,CSF1R,FOXL2,GHRHR,PTAFR,RASGRP1,SCT,TLR2,TNF,UCN3_x000D_
GO:0032602	0.0194424	4.10799	1.02428	4	82	chemokine production	GO_BP	CSF1R,IL1B,TLR2,TNF_x000D_
GO:0022603	0.0195936	1.68128	13.7154	22	1098	regulation of anatomical structure morphogenesis	GO_BP	ABCC8,ARHGAP33,C15orf62,CDK5R1,CHRNA3,CPNE6,CPNE9,CSF1R,ECSCR,EPHA1,HDAC9,HNF4A,IL1B,NFATC2,NOG,RIMS2,RTN4R,SP6,TERT,TIAM1,TNF,XDH_x000D_
GO:0007338	0.0195976	4.09697	1.02669	4	83	single fertilization	GO_BP	CCDC87,FOLR2,FOLR3,FOXL2,HSPA1L,SYT8,UMODL1_x000D_
GO:0032757	0.0196868	5.57497	0.574596	3	46	positive regulation of interleukin-8 production	GO_BP	IL1B,TLR2,TNF_x000D_
GO:1901698	0.0201394	1.69744	12.9534	21	1037	response to nitrogen compound	GO_BP	ABCC8,ASIC1,ATP1A3,CDK5R1,CHRM3,CHRNA3,CHRNA4,CPEB1,FOLR2,GHRHR,HDAC9,IL1B,KCNC1,KCNJ8,OPRM1,PTAFR,SLC34A1,TIAM1,TLR2,TNF,UMODL1_x000D_
GO:0007213	0.0208386	9.95961	0.224842	2	18	G protein-coupled acetylcholine receptor signaling pathway	GO_BP	CDK5R1,CHRM3_x000D_
GO:0044110	0.0208386	9.95961	0.224842	2	18	growth involved in symbiotic interaction	GO_BP	PGLYRP2,TNF_x000D_
GO:0060252	0.0208386	9.95961	0.224842	2	18	positive regulation of glial cell proliferation	GO_BP	IL1B,TNF_x000D_
GO:0050796	0.0211677	2.90699	2.14849	6	172	regulation of insulin secretion	GO_BP	ABCC8,HNF4A,IL1B,TIAM1,TNF,UCN3_x000D_
GO:0014015	0.0215907	5.36903	0.594966	3	48	positive regulation of gliogenesis	GO_BP	IL1B,TIAM1,TLR2,TNF,ZNF365_x000D_
GO:0031644	0.0216855	3.28957	1.58638	5	127	regulation of neurological system process	GO_BP	GRIN2D,NETO1,OPRM1,PTAFR,RIMS2_x000D_
GO:0030902	0.0217024	3.28869	1.58666	5	128	hindbrain development	GO_BP	CDK5R1,GPR37L1,KCNC1,NOG,PHOX2B,SCN5A,ZNF365_x000D_
GO:0070887	0.0217814	1.42417	36.1383	48	2937	cellular response to chemical stimulus	GO_BP	ABCC8,ALOX5AP,ATP1A3,BAAT,CDK5R1,CHRM3,CHRNA3,CHRNA4,CPEB1,CPNE6,CPNE9,CREB3L3,CSF1R,CSF2,CTSS,DAPK2,EBI3,FAM107A,FGFR3,FOLR2,GHRHR,GLYAT,GPR37L1,HDAC9,HLA-DQA1,HNF4A,HSPA1L,IL1B,IL34,KCNC1,LCP1,NOG,NPFFR2,OPRM1,PAX6,PHOX2B,PTAFR,PTPN7,RAMP3,RARB,SCN5A,SELPLG,SLC34A1,STRA8,SYT8,TERT,TIAM1,TLR2,TNF,TNFRSF9,UCN2,UCN3,UMODL1,XDH_x000D_
GO:0051223	0.0219633	1.86084	8.3941	15	672	regulation of protein transport	GO_BP	ABCC8,ACHE,BANK1,CDK5R1,CSF1R,HNF4A,HSPA1L,IL1B,LCP1,OPRM1,RASGRP1,TIAM1,TLR2,TNF,UCN3_x000D_
GO:0002374	0.0231011	9.37323	0.237333	2	19	cytokine secretion involved in immune response	GO_BP	TLR2,TNF_x000D_
GO:0010829	0.0231011	9.37323	0.237333	2	19	negative regulation of glucose transmembrane transport	GO_BP	IL1B,TNF_x000D_
GO:0021533	0.0231011	9.37323	0.237333	2	19	cell differentiation in hindbrain	GO_BP	NOG,PHOX2B_x000D_
GO:0060457	0.0231011	9.37323	0.237333	2	19	negative regulation of digestive system process	GO_BP	SCT,WNK4_x000D_
GO:0008284	0.0243463	1.70781	11.6142	19	937	positive regulation of cell proliferation	GO_BP	CSF1R,CSF2,EBI3,EPHA1,FGFR3,FOLR2,GHRHR,GPR37L1,ICOSLG,IL1B,IL34,NFATC2,NOG,PAX6,PTAFR,RAB25,SCN5A,SHC4,TERT,TIAM1,TNF_x000D_
GO:0010893	0.0254596	8.85201	0.249824	2	20	positive regulation of steroid biosynthetic process	GO_BP	IL1B,TNF_x000D_
GO:0023019	0.0254596	8.85201	0.249824	2	20	signal transduction involved in regulation of gene expression	GO_BP	HNF4A,PAX6_x000D_
GO:0048583	0.025504	1.35259	52.8878	66	4234	regulation of response to stimulus	GO_BP	ABCC8,APC2,ARHGAP33,ARHGAP9,ARHGEF15,BANK1,CD300E,CDK5R1,CHRNA3,CHRNA4,CNIH3,COL20A1,CREB3L3,CSF1R,CSF2,CSPG5,CTSS,DAPK2,EBI3,EPHA1,EPPK1,EPS8L3,EYA2,FGFR3,GHRHR,GPHA2,GPR37L1,HLA-DQA1,HSPA1L,ICOSLG,IGKC,IL1B,IL34,JPH1,LAT,LURAP1,MOG,MUC21,NETO1,NFATC2,NOG,NPFFR2,OPRM1,PGLYRP2,PGLYRP4,PILRA,PLEKHG1,PTAFR,PTPRR,RAMP3,RASGRP1,RIMS2,RTN4R,SAG,SCN5A,SCT,SH2D3A,SYT8,TERT,TIAM1,TLR2,TNF,UCN2,UCN3,XDH,Z…
GO:0009410	0.0257331	2.35514	3.52252	8	282	response to xenobiotic stimulus	GO_BP	ASIC1,BAAT,GLYAT,HDAC9,HNF4A,OPRM1,PTAFR,TIAM1_x000D_
GO:0048699	0.0257972	1.55552	18.2247	27	1459	generation of neurons	GO_BP	ABCC8,ARHGAP33,CDK5R1,CHRNA3,CPNE6,CPNE9,CSF1R,DAGLA,GPR37L1,HDAC9,HOXD1,IL1B,NOG,NRN1L,OPRM1,PAX6,PHOX2B,RARB,RIMS2,RP1L1,RTN4R,TENM2,TERT,TIAM1,TLR2,TNF,ZNF365_x000D_
GO:0009582	0.0258395	3.13433	1.66133	5	133	detection of abiotic stimulus	GO_BP	NPFFR2,PKD2L2,RGR,SAG,TMC2_x000D_
GO:0044409	0.0258395	3.13433	1.66133	5	133	entry into host	GO_BP	MOG,SELPLG,SLC52A1,TMPRSS2,TRIM10_x000D_
GO:0051806	0.0258395	3.13433	1.66133	5	133	entry into cell of other organism involved in symbiotic interaction	GO_BP	MOG,SELPLG,SLC52A1,TMPRSS2,TRIM10_x000D_
GO:0060996	0.0263162	3.72421	1.12421	4	90	dendritic spine development	GO_BP	ARHGAP33,CDK5R1,TIAM1,ZNF365_x000D_
GO:0048641	0.0271494	4.89071	0.649543	3	52	regulation of skeletal muscle tissue development	GO_BP	HDAC9,MEGF10,TLL2_x000D_
GO:0050890	0.0271758	2.32925	3.56	8	285	cognition	GO_BP	ABCC8,ASIC1,CHRNA4,FAM107A,NETO1,PTCHD1,TLR2,TNF_x000D_
GO:0002792	0.0273296	3.08577	1.68631	5	135	negative regulation of peptide secretion	GO_BP	ABCC8,BANK1,IL1B,OPRM1,TNF_x000D_
GO:0010038	0.0276384	2.19427	4.25084	9	343	response to metal ion	GO_BP	ABCC8,ALOX5AP,CPNE6,CPNE9,KCNC1,KCNMB4,KRT14,SCN5A,SLC34A1,SYT8,TERT_x000D_
GO:0050901	0.0276996	8.42105	0.261236	2	21	leukocyte tethering or rolling	GO_BP	PTAFR,SELPLG,TNF_x000D_
GO:0042359	0.0279115	8.38566	0.262315	2	21	vitamin D metabolic process	GO_BP	IL1B,TNF_x000D_
GO:1904994	0.0279115	8.38566	0.262315	2	21	regulation of leukocyte adhesion to vascular endothelial cell	GO_BP	PTAFR,TNF_x000D_
GO:0035023	0.0280948	3.06205	1.6988	5	136	regulation of Rho protein signal transduction	GO_BP	ARHGEF15,EPS8L3,PLEKHG1,RTN4R,TIAM1_x000D_
GO:0048813	0.0280948	3.06205	1.6988	5	136	dendrite morphogenesis	GO_BP	ARHGAP33,CDK5R1,CHRNA3,TIAM1,ZNF365_x000D_
GO:0015696	0.0285085	3.62727	1.15262	4	93	ammonium transport	GO_BP	CHRNA3,CHRNA4,CSF2,RHCG,RHD,SYT8_x000D_
GO:0035036	0.0285202	4.79263	0.662034	3	53	sperm-egg recognition	GO_BP	FOLR2,FOLR3,HSPA1L_x000D_
GO:0003012	0.0286678	2.00191	5.69599	11	456	muscle system process	GO_BP	ABCC8,CHRM3,CHRNA3,HTR1D,IL1B,KCNJ8,MYBPC1,PTAFR,SCN5A,TIAM1,TNNT3_x000D_
GO:0050768	0.028757	2.46783	2.94006	7	239	negative regulation of neurogenesis	GO_BP	ABCC8,CDK5R1,GPR37L1,IL1B,NOG,PAX6,PHOX2B,RTN4R,TERT,TNF,ZNF365_x000D_
GO:0120039	0.0288774	1.83274	7.93192	14	635	plasma membrane bounded cell projection morphogenesis	GO_BP	ARHGAP33,CDK5R1,CHRNA3,CPNE6,CPNE9,CSF1R,NOG,NRN1L,PAX6,PHOX2B,RIMS2,RTN4R,TIAM1,ZNF365_x000D_
GO:0072080	0.0292244	3.59808	1.16168	4	93	nephron tubule development	GO_BP	ADAMTS16,AQP11,NOG,WNK4_x000D_
GO:0008544	0.0294636	1.99273	5.72098	11	458	epidermis development	GO_BP	FOXQ1,KRT14,KRT15,KRT33B,KRT34,KRT80,KRT84,KRTAP2-3,KRTAP20-2,PAX6,TNF_x000D_
GO:0050830	0.0302344	3.55791	1.17417	4	94	defense response to Gram-positive bacterium	GO_BP	PGLYRP2,PGLYRP4,TLR2,TNF_x000D_
GO:0030335	0.0303645	1.91889	6.48294	12	519	positive regulation of cell migration	GO_BP	CSF1R,DAPK2,EPHA1,FAM107A,FERMT3,HDAC9,IL1B,PTAFR,RAB25,TERT,TIAM1,TNF_x000D_
GO:0010447	0.030454	7.96594	0.274807	2	22	response to acidic pH	GO_BP	ASIC1,CTSS_x000D_
GO:0050995	0.030454	7.96594	0.274807	2	22	negative regulation of lipid catabolic process	GO_BP	IL1B,TNF_x000D_
GO:0072073	0.0312908	2.97067	1.74877	5	140	kidney epithelium development	GO_BP	ADAMTS16,AQP11,NOG,RARB,WNK4_x000D_
GO:0040007	0.0321676	1.6509	11.9861	19	967	growth	GO_BP	APOA5,CDK5R1,COL20A1,CPNE6,CPNE9,CSPG5,EPPK1,FAM107A,FGFR3,FOXL2,GHRHR,HNF4A,NOG,NRN1L,PGLYRP2,RARB,RIMS2,RTN4R,TIAM1,TLL2,TNF_x000D_
GO:0021549	0.0323159	3.48018	1.19916	4	96	cerebellum development	GO_BP	CDK5R1,KCNC1,SCN5A,ZNF365_x000D_
GO:0035235	0.0328292	7.61905	0.286085	2	23	ionotropic glutamate receptor signaling pathway	GO_BP	CDK5R1,GRIN2D,TIAM1_x000D_
GO:0019229	0.0328491	4.52061	0.699508	3	56	regulation of vasoconstriction	GO_BP	CHRM3,KCNMB4,PTAFR_x000D_
GO:0009719	0.0329377	1.49607	20.3357	29	1628	response to endogenous stimulus	GO_BP	ABCC8,ATP1A3,CDK5R1,CHRM3,CHRNA3,CHRNA4,CPEB1,CTSS,FAM107A,FGFR3,FOLR2,GHRHR,HDAC9,HNF4A,IL1B,KCNC1,NOG,NPFFR2,OPRM1,PHOX2B,PTAFR,RAMP3,RARB,SLC34A1,TLR2,TNF,UCN2,UCN3,UMODL1_x000D_
GO:0022410	0.0330846	7.58619	0.287298	2	23	circadian sleep/wake cycle process	GO_BP	CSF2,GHRHR_x000D_
GO:0050996	0.0330846	7.58619	0.287298	2	23	positive regulation of lipid catabolic process	GO_BP	APOA5,IL1B_x000D_
GO:1901889	0.0330846	7.58619	0.287298	2	23	negative regulation of cell junction assembly	GO_BP	FAM107A,TNF_x000D_
GO:0098657	0.0336118	1.66523	11.2421	18	900	import into cell	GO_BP	ABCC9,ACHE,APOA5,ATP1A3,CALY,FOLR2,IGKC,IL1B,KCNJ4,KCNJ8,MEGF10,RAMP3,SIGLEC1,SLC34A1,SYT8,TLR2,TMPRSS2,TNF_x000D_
GO:0032515	0.0343639	4.43665	0.711999	3	57	negative regulation of phosphoprotein phosphatase activity	GO_BP	PPP1R36,SAG,TNF_x000D_
GO:0010720	0.0343894	1.88071	6.60785	12	529	positive regulation of cell development	GO_BP	CPNE6,CPNE9,IL1B,OPRM1,PAX6,PHOX2B,RARB,RIMS2,TIAM1,TLR2,TNF,ZNF365_x000D_
GO:0070374	0.0346279	2.3666	3.06035	7	245	positive regulation of ERK1 and ERK2 cascade	GO_BP	CSF1R,EPHA1,FGFR3,OPRM1,RAMP3,RASGRP1,TNF_x000D_
GO:0046928	0.0346787	7.37135	0.294606	2	24	regulation of neurotransmitter secretion	GO_BP	ASIC1,CHRNA3,CHRNA4,CSPG5,KCNMB4,PPFIA2,RIMS2_x000D_
GO:0007268	0.0351651	2.35912	3.07126	7	258	chemical synaptic transmission	GO_BP	ACHE,ASIC1,CHRM3,CHRNA3,CHRNA4,CLSTN2,CNIH3,CPNE6,CSPG5,DGKB,FAM107A,GRIN2D,HTR1D,IL1B,KCNMB4,KCNQ3,NETO1,OPRM1,PCDHB10,PPFIA2,RIMS2,SYT8,TNF_x000D_
GO:0002068	0.035522	7.27273	0.298507	2	24	glandular epithelial cell development	GO_BP	HNF4A,PAX6,RARB_x000D_
GO:0061061	0.0356918	1.77641	8.16925	14	654	muscle structure development	GO_BP	ACHE,FOXL2,HDAC9,JPH1,MAMSTR,MEGF10,MYBPC1,NFATC2,NOG,PHOX2B,RARB,TLL2,TNF,TNNT3_x000D_
GO:0001919	0.0358007	7.24097	0.299789	2	24	regulation of receptor recycling	GO_BP	ACHE,RAMP3_x000D_
GO:2000351	0.0359143	4.35574	0.72449	3	58	regulation of endothelial cell apoptotic process	GO_BP	ECSCR,TERT,TNF_x000D_
GO:0099504	0.0360261	2.54998	2.43579	6	195	synaptic vesicle cycle	GO_BP	CDK5R1,CHRNA4,CSPG5,PPFIA2,RIMS2,SYT8_x000D_
GO:0032990	0.03608	1.77354	8.18174	14	655	cell part morphogenesis	GO_BP	ARHGAP33,CDK5R1,CHRNA3,CPNE6,CPNE9,CSF1R,NOG,NRN1L,PAX6,PHOX2B,RIMS2,RTN4R,TIAM1,ZNF365_x000D_
GO:1903531	0.0367925	2.53642	2.44828	6	196	negative regulation of secretion by cell	GO_BP	ABCC8,ASIC1,BANK1,IL1B,OPRM1,TNF_x000D_
GO:0045596	0.0374643	1.72726	9.00498	15	724	negative regulation of cell differentiation	GO_BP	ABCC8,CDK5R1,GPR37L1,IL1B,NFATC2,NOG,PAX6,PGLYRP2,PGLYRP4,PHOX2B,RARB,RTN4R,TERT,TNF,XDH,ZNF365_x000D_
GO:0051048	0.0375193	7.03763	0.307444	2	25	negative regulation of secretion	GO_BP	ABCC8,ASIC1,BANK1,IL1B,OPRM1,SCT,TNF,WNK4_x000D_
GO:0007010	0.0376642	1.53307	16.3385	24	1308	cytoskeleton organization	GO_BP	APC2,ARHGEF15,ARMC4,C15orf62,CALML6,CDK5R1,CSF1R,DNAI1,EPHA1,EPPK1,FAM107A,FHDC1,FRMD5,KRT14,KRT15,KRT84,LCP1,LURAP1,MYBPC1,NCKAP5,PAX6,RP1L1,TNF,TNNT3_x000D_
GO:0050804	0.037794	2.1758	3.80095	8	312	modulation of chemical synaptic transmission	GO_BP	ACHE,ASIC1,CHRNA3,CHRNA4,CLSTN2,CSPG5,DGKB,FAM107A,GRIN2D,IL1B,KCNMB4,NETO1,PPFIA2,RIMS2,TNF_x000D_
GO:0015837	0.0378792	3.29988	1.26161	4	101	amine transport	GO_BP	CHRNA3,CHRNA4,RHCG,SYT8_x000D_
GO:0014014	0.0380508	6.9818	0.309828	2	25	negative regulation of gliogenesis	GO_BP	ABCC8,GPR37L1,NOG,TERT_x000D_
GO:1903305	0.0383442	2.80324	1.8487	5	148	regulation of regulated secretory pathway	GO_BP	CHRNA4,CSPG5,PPFIA2,PTAFR,RIMS2_x000D_
GO:0000902	0.0385673	1.61349	12.2414	19	980	cell morphogenesis	GO_BP	ARHGAP33,C15orf62,CDK5R1,CHRNA3,COL20A1,CPNE6,CPNE9,CSF1R,EPHA1,FERMT3,NOG,NRN1L,PAX6,PHOX2B,RAB25,RIMS2,RTN4R,TIAM1,ZNF365_x000D_
GO:0003309	0.0385997	6.92576	0.31228	2	25	type B pancreatic cell differentiation	GO_BP	HNF4A,PAX6_x000D_
GO:0046885	0.0385997	6.92576	0.31228	2	25	regulation of hormone biosynthetic process	GO_BP	IL1B,TNF_x000D_
GO:0042136	0.0390537	3.26603	1.2741	4	102	neurotransmitter biosynthetic process	GO_BP	ACHE,DAGLA,IL1B,TNF_x000D_
GO:0010830	0.0391215	4.20245	0.749473	3	60	regulation of myotube differentiation	GO_BP	HDAC9,MAMSTR,NFATC2_x000D_
GO:0051384	0.0392887	2.78362	1.86119	5	149	response to glucocorticoid	GO_BP	FAM107A,GHRHR,PTAFR,TNF,UCN3_x000D_
GO:0006952	0.0403136	1.46587	20.7104	29	1658	defense response	GO_BP	ABCC9,ASIC1,CD300E,COL20A1,CREB3L3,CSF1R,CTSS,DEFB132,FOLR2,HDAC9,HLA-DQA1,ICOSLG,IGKC,IL1B,IL34,KCNJ8,LAT,LILRB5,MUC21,OPRM1,PADI4,PGLYRP2,PGLYRP4,PTAFR,RASGRP1,SIGLEC1,TLR2,TNF,TRIM10_x000D_
GO:0035082	0.0407779	4.12976	0.761964	3	61	axoneme assembly	GO_BP	ARMC4,DNAI1,RP1L1_x000D_
GO:0098660	0.0408763	1.70598	9.11485	15	746	inorganic ion transmembrane transport	GO_BP	ABCC8,ABCC9,ASIC1,ATP1A3,GRIN2D,JPH1,KCNC1,KCNJ4,KCNJ8,KCNMB4,KCNQ3,NETO1,OPRM1,OTOP2,PKD2L2,PTAFR,RAMP3,SCN5A,SLC34A1,TMC2,WNK4_x000D_
GO:0051017	0.0412201	2.74518	1.88617	5	151	actin filament bundle assembly	GO_BP	ARHGEF15,EPHA1,FAM107A,FHDC1,LCP1_x000D_
GO:0030029	0.0418862	1.69931	9.14357	15	732	actin filament-based process	GO_BP	ARHGEF15,C15orf62,CDK5R1,CSF1R,EPHA1,FAM107A,FHDC1,FRMD5,KCNJ8,LCP1,LURAP1,MYBPC1,SCN5A,TNF,TNNT3_x000D_
GO:0048640	0.042153	3.18234	1.30604	4	105	negative regulation of developmental growth	GO_BP	CDK5R1,FGFR3,NOG,RTN4R,TLL2_x000D_
GO:0000165	0.0424617	1.61513	11.5669	18	926	MAPK cascade	GO_BP	BANK1,CSF1R,CSF2,EPHA1,FGFR3,GPR37L1,GRIN2D,IL1B,LAT,NPFFR2,OPRM1,PTPRR,RAMP3,RASGRP1,SH2D3A,TIAM1,TNF,XDH_x000D_
GO:0006940	0.0424693	4.05955	0.774455	3	62	regulation of smooth muscle contraction	GO_BP	CHRM3,CHRNA3,PTAFR_x000D_
GO:0032768	0.0424693	4.05955	0.774455	3	62	regulation of monooxygenase activity	GO_BP	IL1B,TERT,TNF_x000D_
GO:1902305	0.0424693	4.05955	0.774455	3	62	regulation of sodium ion transmembrane transport	GO_BP	NETO1,SCN5A,WNK4_x000D_
GO:0043266	0.0427011	3.16849	1.31158	4	105	regulation of potassium ion transport	GO_BP	ABCC8,KCNC1,NETO1,WNK4_x000D_
GO:0017156	0.0432082	2.70779	1.91116	5	153	calcium ion regulated exocytosis	GO_BP	CHRNA4,CSPG5,PPFIA2,RIMS2,SYT8_x000D_
GO:0042107	0.0439583	3.13725	1.32407	4	106	cytokine metabolic process	GO_BP	EBI3,IL1B,PTAFR,TNF_x000D_
GO:0002694	0.0440562	1.80516	6.87017	12	550	regulation of leukocyte activation	GO_BP	BANK1,EBI3,ICOSLG,IGKC,IL1B,LAT,NFATC2,PGLYRP2,PGLYRP4,PTAFR,RASGRP1,TNF_x000D_
GO:0097066	0.0444368	6.371	0.337263	2	27	response to thyroid hormone	GO_BP	CTSS,SLC34A1_x000D_
GO:2000463	0.0444368	6.371	0.337263	2	27	positive regulation of excitatory postsynaptic potential	GO_BP	NETO1,RIMS2_x000D_
GO:0060284	0.0444577	2.0015	4.64479	9	381	regulation of cell development	GO_BP	ABCC8,ARHGAP33,CDK5R1,CHRNA3,CPNE6,CPNE9,GPR37L1,HDAC9,IL1B,NOG,OPRM1,PAX6,PHOX2B,RARB,RIMS2,RTN4R,TERT,TIAM1,TLR2,TNF,ZNF365_x000D_
GO:0051272	0.0455772	1.79485	6.90764	12	553	positive regulation of cellular component movement	GO_BP	CSF1R,DAPK2,EPHA1,FAM107A,FERMT3,HDAC9,IL1B,PTAFR,RAB25,TERT,TIAM1,TNF_x000D_
GO:0051050	0.0459121	1.74889	7.69065	13	633	positive regulation of transport	GO_BP	ABCC8,ACHE,APOA5,CALY,CDK5R1,CSF1R,CTSS,FOXL2,GHRHR,HSPA1L,IL1B,KCNC1,PTAFR,RAMP3,RASGRP1,SCN5A,SCT,SLC34A1,TERT,TLR2,TNF,UCN3,WNK4_x000D_
GO:0071241	0.0459154	2.39615	2.58568	6	207	cellular response to inorganic substance	GO_BP	ALOX5AP,CPNE6,CPNE9,SCN5A,SLC34A1,SYT8_x000D_
GO:0050795	0.0459562	3.92601	0.799438	3	64	regulation of behavior	GO_BP	CSF2,GHRHR,HTR1D_x000D_
GO:2001236	0.0462969	2.65355	1.94863	5	156	regulation of extrinsic apoptotic signaling pathway	GO_BP	CSF2,EYA2,IL1B,TERT,TNF_x000D_
GO:0006690	0.0465345	3.07658	1.34905	4	108	icosanoid metabolic process	GO_BP	ALOX5AP,CYP4F22,DAGLA,TLR2_x000D_
GO:0001775	0.0471687	1.4823	17.5751	25	1407	cell activation	GO_BP	ARHGAP9,BANK1,CEACAM3,CHRNA4,CSF2,CTSS,DGKB,EBI3,FERMT3,FOLR3,HDAC9,ICOSLG,IGKC,IL1B,LAT,LCP1,MEGF10,NFATC2,PGLYRP2,PGLYRP4,PTAFR,RASGRP1,SELPLG,TLR2,TNF_x000D_
GO:0021591	0.04747	6.12563	0.349754	2	28	ventricular system development	GO_BP	AK8,ARMC4_x000D_
GO:0042044	0.04747	6.12563	0.349754	2	28	fluid transport	GO_BP	AQP10,CSF2_x000D_
GO:0061037	0.04747	6.12563	0.349754	2	28	negative regulation of cartilage development	GO_BP	NOG,RARB_x000D_
GO:0090087	0.047921	6.08446	0.351495	2	29	regulation of peptide transport	GO_BP	ABCC8,ACHE,BANK1,CDK5R1,CSF1R,GHRHR,HNF4A,HSPA1L,IL1B,LCP1,OPRM1,RASGRP1,SCT,TIAM1,TLR2,TNF,UCN3_x000D_
GO:0060627	0.0488734	1.82495	6.22062	11	498	regulation of vesicle-mediated transport	GO_BP	APOA5,CALY,CHRNA4,CSPG5,IL1B,PPFIA2,PTAFR,RAB25,RIMS2,TLR2,TNF_x000D_
GO:0051056	0.0490347	2.05722	4.00968	8	321	regulation of small GTPase mediated signal transduction	GO_BP	ARHGAP33,ARHGAP9,ARHGEF15,EPS8L3,PLEKHG1,RASGRP1,RTN4R,TIAM1_x000D_
GO:0014706	0.04915	1.96041	4.73417	9	379	striated muscle tissue development	GO_BP	EYA2,FOXL2,HDAC9,MEGF10,MYBPC1,NOG,PHOX2B,RARB,TLL2_x000D_
GO:0006026	0.0495803	3.80096	0.82442	3	66	aminoglycan catabolic process	GO_BP	CSPG5,PGLYRP2,PGLYRP4_x000D_
GO:0005887	1.11712e-06	2.50935	18.4825	41	1499	integral component of plasma membrane	GO_CC	ABCC8,ABCC9,ASIC1,ATP1A3,CALY,CHRM3,CHRNA3,CHRNA4,CLSTN2,CNIH3,CSF1R,CSPG5,DAGLA,EBI3,EPHA1,FGFR3,GPR151,GRIN2D,HLA-DQA1,HTR1D,JAM2,KCNC1,KCNJ4,KCNJ8,KCNMB4,KCNQ3,NETO1,NPFFR2,OPRM1,PCDH11X,PCDHA5,PCDHB10,PRRG2,PTAFR,RAMP3,RGR,RHCG,RHD,RTN4R,SCN5A,SELPLG,SLC34A1,SLC52A1,TENM2,TLR2,TMC2,TMPRSS2,TNF,TNFRSF9,TSPAN11,UPK1B_x000D_
GO:0045211	4.20266e-06	4.2502	4.1112	16	322	postsynaptic membrane	GO_CC	CHRM3,CHRNA3,CHRNA4,CLSTN2,CNIH3,CPEB1,CSPG5,DAGLA,GRIN2D,KCNC1,KCNJ4,NETO1,OPRM1,SHC4,TENM2,TIAM1_x000D_
GO:0008282	8.1494e-06	234.762	0.0510708	3	4	inward rectifying potassium channel	GO_CC	ABCC8,ABCC9,KCNJ8_x000D_
GO:0044425	1.37167e-05	1.74823	81.1838	113	6489	membrane part	GO_CC	ABCC8,ABCC9,ACHE,ALOX5AP,AP3B2,APC2,AQP10,AQP11,ART3,ASIC1,ATP1A3,CALY,CD300E,CEACAM3,CHRM3,CHRNA3,CHRNA4,CLSTN2,CNIH3,CPEB1,CREB3L3,CSF1R,CSPG5,CYP4B1,CYP4F22,CYS1,DAGLA,EBI3,ECSCR,EPHA1,EPPK1,EPS8L3,ESAM,FAM107A,FAM163B,FAM174B,FAM198B,FGFR3,FOLR2,FOLR3,FRMD5,GALNT18,GHRHR,GPR137C,GPR151,GPR37L1,GRIN2D,HLA-DQA1,HTR1D,ICOSLG,IGKC,ILDR2,JAM2,JPH1,KCNC1,KCNJ4,KCNJ8,KCNMB4,KCNQ3,KIAA1549L,LAT,LCP1,…
GO:0005886	1.74941e-05	1.75907	67.7182	98	5397	plasma membrane	GO_CC	ABCC8,ABCC9,ACHE,APC2,AQP10,AQP11,ARHGAP33,ART3,ASIC1,ATP1A3,AZGP1,C15orf62,CALY,CD300E,CDK5R1,CEACAM3,CHRM3,CHRNA3,CHRNA4,CLSTN2,CNIH3,CPEB1,CPNE6,CPNE9,CSF1R,CSPG5,CYS1,DAGLA,DGKB,DIRAS1,EBI3,ECSCR,EPHA1,EPPK1,EPS8L3,ESAM,FAM107A,FBP2,FGFR3,FOLR2,FOLR3,GHRHR,GPR151,GPR37L1,GRIN2D,HLA-DQA1,HTR1D,ICOSLG,IGKC,JAM2,JPH1,KCNC1,KCNJ4,KCNJ8,KCNMB4,KCNQ3,LAT,LCP1,MEGF10,MISP,MOG,MUC21,NETO1,NPFFR2,NRN1…
GO:0099080	0.000193429	2.33014	12.0399	26	943	supramolecular complex	GO_CC	ABCC9,APC2,CDK5R1,DNAI1,EPPK1,FBP2,FHDC1,JPH1,KCNJ8,KIF1A,KRT14,KRT15,KRT33B,KRT34,KRT80,KRT84,KRTAP2-3,KRTAP20-2,LCP1,MTUS2,MYBPC1,NCKAP5,RP1L1,SCN5A,TIAM1,TNNT3_x000D_
GO:1902495	0.000295661	3.34314	4.1495	13	325	transmembrane transporter complex	GO_CC	ABCC8,ABCC9,ATP1A3,CHRNA3,CHRNA4,CNIH3,GRIN2D,KCNC1,KCNJ4,KCNJ8,KCNMB4,KCNQ3,SCN5A_x000D_
GO:0044463	0.00031239	2.02943	18.194	34	1425	cell projection part	GO_CC	AK8,AP3B2,APC2,AQP11,ARHGAP33,ARHGEF15,ARMC4,CDK5R1,CHRM3,CHRNA3,CHRNA4,CNIH3,CPEB1,CPNE6,CYS1,DAGLA,DNAI1,EPS8L3,FAM107A,HTR1D,KCNC1,KCNQ3,KIF1A,LCP1,OPRM1,RAB25,RP1L1,RTN4R,SAG,SLC34A1,TENM2,TIAM1,TMC2,UCN3_x000D_
GO:0098590	0.000505902	2.08552	14.9765	29	1173	plasma membrane region	GO_CC	APC2,CHRM3,CHRNA3,CHRNA4,CLSTN2,CNIH3,CPEB1,CSPG5,CYS1,DAGLA,EPPK1,EPS8L3,FAM107A,GRIN2D,KCNC1,KCNJ4,LCP1,NETO1,OPRM1,RAB25,RHCG,RIMS2,SCN5A,SELPLG,SHC4,SLC34A1,TENM2,TIAM1,UPK1B_x000D_
GO:0034703	0.000532133	3.81167	2.79612	10	219	cation channel complex	GO_CC	ABCC8,ABCC9,CNIH3,GRIN2D,KCNC1,KCNJ4,KCNJ8,KCNMB4,KCNQ3,SCN5A_x000D_
GO:0099055	0.0007661	5.03301	1.49382	7	117	integral component of postsynaptic membrane	GO_CC	CHRM3,CLSTN2,CSPG5,DAGLA,KCNC1,NETO1,OPRM1_x000D_
GO:0120025	0.000867247	1.77854	26.3525	43	2064	plasma membrane bounded cell projection	GO_CC	AK8,AP3B2,APC2,AQP11,ARHGAP33,ARHGEF15,ARMC4,ATP1A3,CDK5R1,CHRM3,CHRNA3,CHRNA4,CNIH3,CPEB1,CPNE6,CYS1,DAGLA,DNAI1,EPHA1,EPS8L3,FAM107A,FHDC1,HTR1D,KCNC1,KCNQ3,KIF1A,LCP1,MYO7B,NRN1L,OPRM1,RAB25,RP1L1,RTN4R,SAG,SCN5A,SELPLG,SLC34A1,SYT8,TCTE1,TENM2,TIAM1,TMC2,UCN3_x000D_
GO:0099240	0.00134784	4.01104	2.11944	8	166	intrinsic component of synaptic membrane	GO_CC	CHRM3,CHRNA4,CLSTN2,CSPG5,DAGLA,KCNC1,NETO1,OPRM1_x000D_
GO:0009986	0.00158328	2.54787	6.23005	15	501	cell surface	GO_CC	ACHE,AQP11,ASIC1,CHRNA4,CLSTN2,CSF1R,CSPG5,EBI3,FGFR3,FOLR2,FOLR3,GHRHR,ICOSLG,IGKC,KCNC1,KCNQ3,MOG,PPFIA2,RAMP3,RTN4R,SCN5A,SLC34A1,TLR2,TNF,TNFRSF9,UMODL1_x000D_
GO:0030054	0.00166918	1.91725	16.1767	29	1267	cell junction	GO_CC	ACHE,CHRM3,CHRNA3,CHRNA4,CNIH3,CPEB1,EPPK1,ESAM,FAM107A,FBP2,FERMT3,FGFR3,FRMD5,GRIN2D,JAM2,KCNJ4,LAT,LCP1,MISP,NETO1,OPRM1,PDZD2,PTPRR,RIMS2,SCN5A,SHC4,TENM2,TIAM1,WNK4_x000D_
GO:0030424	0.00170603	2.37099	7.58401	17	594	axon	GO_CC	AP3B2,ATP1A3,CDK5R1,CHRM3,CPNE6,DAGLA,KCNC1,KCNQ3,KIF1A,NRN1L,OPRM1,RTN4R,SCN5A,SYT8,TENM2,TIAM1,UCN3_x000D_
GO:0031362	0.00171298	14.6613	0.242586	3	19	anchored component of external side of plasma membrane	GO_CC	FOLR2,FOLR3,RTN4R_x000D_
GO:0044456	0.0021387	2.79082	4.53839	12	369	synapse part	GO_CC	ABCC8,ACHE,APC2,ARHGAP33,CALY,CDK5R1,CHRM3,CHRNA3,CHRNA4,CLSTN2,CNIH3,CPEB1,CSPG5,DAGLA,GRIN2D,KCNC1,KCNJ4,KIF1A,NETO1,OPRM1,PPFIA2,RIMS2,RTN4R,SHC4,SYT8,TENM2,TIAM1,UCN3_x000D_
GO:0030425	0.00213946	2.31715	7.74999	17	607	dendrite	GO_CC	AQP11,ARHGAP33,ARHGEF15,CDK5R1,CHRM3,CHRNA3,CHRNA4,CNIH3,CPEB1,CPNE6,HTR1D,KCNC1,KIF1A,OPRM1,RTN4R,TENM2,TIAM1_x000D_
GO:0098839	0.00272065	5.61498	0.957577	5	75	postsynaptic density membrane	GO_CC	CHRM3,CLSTN2,GRIN2D,NETO1,TIAM1_x000D_
GO:0001891	0.00301514	11.7266	0.293657	3	23	phagocytic cup	GO_CC	LCP1,MEGF10,TNF_x000D_
GO:0005576	0.00317372	1.48446	57.8887	77	4534	extracellular region	GO_CC	ACHE,ADAMTS16,ANGPTL7,APC2,APOA5,ARHGAP9,ART3,ATP1A3,AZGP1,C16orf89,COL20A1,CPNE6,CPNE9,CSF2,CSPG5,CTSS,DEFB132,EBI3,FBP2,FERMT3,FGFR3,FOLR2,FOLR3,FOXL2,GPHA2,HAPLN2,HSPA1L,ICOSLG,IGKC,IL1B,IL34,KRT14,KRT15,KRT33B,KRT34,KRT84,LCN10,LCP1,LMAN1L,LPAL2,MUM1L1,NETO1,NOG,NRN1L,OBP2A,PDZD2,PGLYRP2,PGLYRP4,PILRA,PPFIA2,PRH1,PRRG2,PRSS36,PRSS41,PSG11,PSG5,PTPRR,RAB25,RHCG,RIMS2,RTN4R,SCT,SIGLEC1,SPINK4,S…
GO:0099512	0.00348003	2.15105	8.82954	18	706	supramolecular fiber	GO_CC	ABCC9,APC2,CDK5R1,DNAI1,EPPK1,FBP2,FHDC1,JPH1,KCNJ8,KIF1A,KRT14,KRT15,KRT33B,KRT34,KRT80,KRT84,KRTAP2-3,KRTAP20-2,LCP1,MTUS2,MYBPC1,NCKAP5,RP1L1,SCN5A,TIAM1,TNNT3_x000D_
GO:0043196	0.00432145	25.9732	0.102142	2	8	varicosity	GO_CC	DAGLA,UCN3_x000D_
GO:0008076	0.00594023	4.62052	1.14909	5	90	voltage-gated potassium channel complex	GO_CC	KCNC1,KCNJ4,KCNJ8,KCNMB4,KCNQ3_x000D_
GO:0031225	0.00610288	3.40827	2.15774	7	169	anchored component of membrane	GO_CC	ACHE,ART3,FOLR2,FOLR3,NRN1L,PRSS41,RTN4R_x000D_
GO:0031226	0.00618889	5.85056	0.73187	4	66	intrinsic component of plasma membrane	GO_CC	ABCC8,ABCC9,ART3,ASIC1,ATP1A3,CALY,CHRM3,CHRNA3,CHRNA4,CLSTN2,CNIH3,CSF1R,CSPG5,DAGLA,EBI3,EPHA1,FGFR3,FOLR2,FOLR3,GPR151,GRIN2D,HLA-DQA1,HTR1D,JAM2,KCNC1,KCNJ4,KCNJ8,KCNMB4,KCNQ3,NETO1,NPFFR2,NRN1L,OPRM1,PCDH11X,PCDHA5,PCDHB10,PRRG2,PTAFR,RAMP3,RGR,RHCG,RHD,RTN4R,SCN5A,SELPLG,SLC34A1,SLC52A1,TENM2,TLR2,TMC2,TMPRSS2,TNF,TNFRSF9,TSPAN11,UPK1B_x000D_
GO:0009897	0.00665061	2.5103	4.5836	11	359	external side of plasma membrane	GO_CC	CHRNA4,EBI3,FOLR2,FOLR3,ICOSLG,IGKC,MOG,RTN4R,TNF,TNFRSF9,UMODL1_x000D_
GO:0042383	0.0072786	3.71801	1.6981	6	133	sarcolemma	GO_CC	ABCC8,ABCC9,GHRHR,KCNJ8,OPRM1,SCN5A_x000D_
GO:0045095	0.0081094	4.26741	1.23847	5	97	keratin filament	GO_CC	EPPK1,KRT14,KRT80,KRT84,KRTAP2-3_x000D_
GO:0042995	0.00856975	5.30729	0.803865	4	68	cell projection	GO_CC	AK8,AP3B2,APC2,AQP11,ARHGAP33,ARHGEF15,ARMC4,ATP1A3,CDK5R1,CHRM3,CHRNA3,CHRNA4,CNIH3,CPEB1,CPNE6,CYS1,DAGLA,DNAI1,EPHA1,EPPK1,EPS8L3,FAM107A,FERMT3,FHDC1,HTR1D,KCNC1,KCNQ3,KIF1A,LCP1,MEGF10,MYO7B,NRN1L,OPRM1,RAB25,RP1L1,RTN4R,SAG,SCN5A,SELPLG,SLC34A1,SYT8,TCTE1,TENM2,TIAM1,TLR2,TMC2,UCN3_x000D_
GO:0043292	0.00939353	2.85824	2.9238	8	229	contractile fiber	GO_CC	ABCC9,CDK5R1,FBP2,JPH1,KCNJ8,MYBPC1,SCN5A,TNNT3_x000D_
GO:0032838	0.0131636	2.91727	2.50247	7	196	plasma membrane bounded cell projection cytoplasm	GO_CC	AK8,AP3B2,ARMC4,DNAI1,KIF1A,OPRM1,RP1L1_x000D_
GO:0043235	0.0132164	2.26464	5.056	11	396	receptor complex	GO_CC	CHRNA3,CHRNA4,CNIH3,CSF1R,EBI3,EPHA1,FGFR3,GPR37L1,GRIN2D,RAMP3,TLR2_x000D_
GO:0099056	0.015551	4.41056	0.957577	4	75	integral component of presynaptic membrane	GO_CC	CHRM3,CHRNA4,KCNC1,OPRM1_x000D_
GO:0045121	0.0165312	2.40954	3.88138	9	304	membrane raft	GO_CC	CHRNA3,LAT,OPRM1,RTN4R,SCN5A,SELPLG,SLC34A1,TLR2,TNF_x000D_
GO:0044430	0.0177185	1.56041	20.9224	31	1645	cytoskeletal part	GO_CC	AK8,APC2,ARMC4,CCDC96,CCIN,CDK5R1,DNAI1,EPPK1,FAM107A,FERMT3,FHDC1,KIF1A,KRT14,KRT15,KRT33B,KRT34,KRT80,KRT84,KRTAP2-3,KRTAP20-2,LCP1,LURAP1,MOBP,MTUS2,MYBPC1,MYO7B,NCKAP5,RP1L1,SLC34A1,TIAM1,TNNT3,ZNF365_x000D_
GO:0036477	0.0193269	1.78065	10.5333	18	825	somatodendritic compartment	GO_CC	AQP11,ARHGAP33,ARHGEF15,ATP1A3,CDK5R1,CHRM3,CHRNA3,CHRNA4,CNIH3,CPEB1,CPNE6,HTR1D,KCNC1,KIF1A,OPRM1,RTN4R,TENM2,TIAM1_x000D_
GO:0005892	0.0194629	10.3845	0.217051	2	17	acetylcholine-gated channel complex	GO_CC	CHRNA3,CHRNA4_x000D_
GO:0098589	0.0206728	2.3139	4.03459	9	316	membrane region	GO_CC	CHRNA3,LAT,OPRM1,RTN4R,SCN5A,SELPLG,SLC34A1,TLR2,TNF_x000D_
GO:0098793	0.0215202	2.02311	6.15403	12	482	presynapse	GO_CC	ABCC8,CDK5R1,CHRM3,CHRNA4,KCNC1,KIF1A,OPRM1,PPFIA2,RIMS2,RTN4R,SYT8,UCN3_x000D_
GO:0099061	0.0273197	4.87903	0.651152	3	51	integral component of postsynaptic density membrane	GO_CC	CHRM3,CLSTN2,NETO1_x000D_
GO:0032587	0.0292474	3.59644	1.16186	4	91	ruffle membrane	GO_CC	EPS8L3,FAM107A,LCP1,TIAM1_x000D_
GO:0042629	0.0317097	7.78635	0.280889	2	22	mast cell granule	GO_CC	LAT,RASGRP1_x000D_
GO:0098797	0.0361548	1.92298	5.91107	11	474	plasma membrane protein complex	GO_CC	ABCC8,ABCC9,APC2,ATP1A3,CHRNA3,CHRNA4,CNIH3,EBI3,GRIN2D,HLA-DQA1,KCNC1,KCNJ4,KCNJ8,KCNMB4,KCNQ3,RAMP3,SCN5A,TLR2_x000D_
GO:0098978	0.0363959	2.07948	4.46869	9	350	glutamatergic synapse	GO_CC	CALY,CHRM3,CLSTN2,CSPG5,DGKB,NETO1,PPFIA2,RTN4R,TIAM1_x000D_
GO:0044304	0.0405554	4.13885	0.760267	3	60	main axon	GO_CC	DAGLA,KCNC1,KCNQ3,TIAM1,UCN3_x000D_
GO:0030017	0.0411279	2.46398	2.51523	6	197	sarcomere	GO_CC	ABCC9,FBP2,JPH1,MYBPC1,SCN5A,TNNT3_x000D_
GO:0032809	0.0431583	6.48728	0.33196	2	26	neuronal cell body membrane	GO_CC	ATP1A3,KCNC1_x000D_
GO:0044295	0.0431583	6.48728	0.33196	2	26	axonal growth cone	GO_CC	RTN4R,TIAM1_x000D_
GO:0005882	0.0448921	3.1136	1.33299	4	106	intermediate filament	GO_CC	EPPK1,KRT14,KRT15,KRT33B,KRT34,KRT80,KRT84,KRTAP2-3,KRTAP20-2_x000D_
GO:0044297	0.0495318	1.76781	6.99669	12	548	cell body	GO_CC	ATP1A3,CDK5R1,CHRNA3,CHRNA4,CPNE6,HSPA1L,KCNC1,KIF1A,OPRM1,RTN4R,TIAM1,TLR2_x000D_
GO:0022803	9.47229e-06	3.48349	5.9721	19	468	passive transmembrane transporter activity	GO_MF	ABCC8,ABCC9,AQP10,AQP11,ASIC1,CHRNA3,CHRNA4,GRIN2D,JPH1,KCNC1,KCNJ4,KCNJ8,KCNMB4,KCNQ3,OPRM1,OTOP2,PKD2L2,SCN5A,TMC2_x000D_
GO:0022838	3.3592e-05	3.4102	5.41741	17	428	substrate-specific channel activity	GO_MF	ABCC8,ABCC9,AQP10,AQP11,ASIC1,CHRNA3,CHRNA4,GRIN2D,JPH1,KCNC1,KCNJ4,KCNJ8,KCNMB4,KCNQ3,OPRM1,OTOP2,PKD2L2,SCN5A,TMC2_x000D_
GO:0008324	3.39524e-05	2.88128	8.33286	22	653	cation transmembrane transporter activity	GO_MF	ABCC8,ABCC9,ASIC1,ATP1A3,CHRNA3,CHRNA4,GRIN2D,JPH1,KCNC1,KCNJ4,KCNJ8,KCNMB4,KCNQ3,OPRM1,OTOP2,PKD2L2,RHCG,RHD,SCN5A,SLC34A1,SLC45A2,TMC2_x000D_
GO:0042166	5.39295e-05	24.2172	0.216935	4	17	acetylcholine binding	GO_MF	ACHE,CHRM3,CHRNA3,CHRNA4_x000D_
GO:0038187	0.000106532	19.6731	0.255218	4	20	pattern recognition receptor activity	GO_MF	PGLYRP2,PGLYRP4,PTAFR,TLR2_x000D_
GO:0022839	0.000133234	3.45489	4.36422	14	342	ion gated channel activity	GO_MF	ABCC8,ASIC1,CHRNA3,CHRNA4,GRIN2D,JPH1,KCNC1,KCNJ4,KCNJ8,KCNMB4,KCNQ3,OPRM1,SCN5A,TMC2_x000D_
GO:0005509	0.000243549	2.54779	8.89434	21	697	calcium ion binding	GO_MF	CALML6,CDK5R1,CLSTN2,COL20A1,CPNE6,DGKB,LCP1,PADI4,PCDH11X,PCDHA5,PCDHB10,PKD2L2,PRRG2,RASGRP1,SPATA21,SYT8,TENM2,TLL1,TLL2,TNNT3,UMODL1_x000D_
GO:0005542	0.000414309	26.1231	0.153131	3	12	folic acid binding	GO_MF	FOLR2,FOLR3,GNMT_x000D_
GO:0022834	0.000528382	4.68176	1.83757	8	144	ligand-gated channel activity	GO_MF	ABCC8,ASIC1,CHRNA3,CHRNA4,GRIN2D,JPH1,KCNJ4,KCNJ8_x000D_
GO:0005215	0.000592039	2.04665	15.9128	30	1247	transporter activity	GO_MF	ABCC8,ABCC9,AP3B2,APOA5,AQP10,AQP11,ASIC1,ATP1A3,AZGP1,CHRNA3,CHRNA4,CPNE6,GRIN2D,JPH1,KCNC1,KCNJ4,KCNJ8,KCNMB4,KCNQ3,OPRM1,OTOP2,PKD2L2,RAMP3,RHCG,RHD,SCN5A,SLC34A1,SLC45A2,SLC52A1,TMC2_x000D_
GO:0008745	0.000956426	78.0493	0.0510436	2	4	N-acetylmuramoyl-L-alanine amidase activity	GO_MF	PGLYRP2,PGLYRP4_x000D_
GO:0051431	0.000956426	78.0493	0.0510436	2	4	corticotropin-releasing hormone receptor 2 binding	GO_MF	UCN2,UCN3_x000D_
GO:0015079	0.00105312	4.18506	2.04174	8	160	potassium ion transmembrane transporter activity	GO_MF	ABCC8,ABCC9,ATP1A3,KCNC1,KCNJ4,KCNJ8,KCNMB4,KCNQ3_x000D_
GO:0022832	0.00105914	3.77566	2.53942	9	199	voltage-gated channel activity	GO_MF	ABCC8,GRIN2D,KCNC1,KCNJ4,KCNJ8,KCNQ3,OPRM1,SCN5A,TMC2_x000D_
GO:0042834	0.00122163	16.7886	0.216935	3	17	peptidoglycan binding	GO_MF	PGLYRP2,PGLYRP4,TLR2_x000D_
GO:0015318	0.00124792	2.18103	10.7957	22	846	inorganic molecular entity transmembrane transporter activity	GO_MF	ABCC8,ABCC9,AQP10,AQP11,ASIC1,ATP1A3,CHRNA3,CHRNA4,GRIN2D,JPH1,KCNC1,KCNJ4,KCNJ8,KCNMB4,KCNQ3,OPRM1,OTOP2,PKD2L2,SCN5A,SLC34A1,SLC45A2,TMC2_x000D_
GO:0001875	0.00158063	52.0299	0.0638044	2	5	lipopolysaccharide receptor activity	GO_MF	PTAFR,TLR2_x000D_
GO:0015272	0.00158063	52.0299	0.0638044	2	5	ATP-activated inward rectifier potassium channel activity	GO_MF	ABCC8,KCNJ8_x000D_
GO:0016019	0.00158063	52.0299	0.0638044	2	5	peptidoglycan receptor activity	GO_MF	PGLYRP2,PGLYRP4_x000D_
GO:1990254	0.00235101	39.0202	0.0765653	2	6	keratin filament binding	GO_MF	EPPK1,KRT14_x000D_
GO:0015464	0.00300725	11.748	0.2935	3	23	acetylcholine receptor activity	GO_MF	CHRM3,CHRNA3,CHRNA4_x000D_
GO:0043177	0.004757	3.23728	2.60322	8	204	organic acid binding	GO_MF	ALOX5AP,FOLR2,FOLR3,GNMT,HAPLN2,HNF4A,PADI4,RTN4R_x000D_
GO:0098772	0.00500008	1.66203	23.9905	37	1880	molecular function regulator	GO_MF	ABCC9,ADPRH,ALOX5AP,APOA5,ARHGAP33,ARHGAP9,ARHGEF15,CALML6,CDK5R1,CNIH3,CSF2,CSPG5,EBI3,EPS8L3,FGFR3,FOXL2,GPHA2,GRIN2D,IL1B,IL34,KCNMB4,LAT,PLEKHG1,PPP1R36,RASGRP1,SAG,SCT,SH2D3A,SPINK4,SSPO,TIAM1,TNF,UCN2,UCN3,UMODL1,WFDC3,WNK4_x000D_
GO:0005249	0.0053775	4.7437	1.12296	5	88	voltage-gated potassium channel activity	GO_MF	ABCC8,KCNC1,KCNJ4,KCNJ8,KCNQ3_x000D_
GO:0005088	0.00544986	2.91871	3.24127	9	254	Ras guanyl-nucleotide exchange factor activity	GO_MF	ARHGEF15,CSF2,EPS8L3,FGFR3,GRIN2D,LAT,PLEKHG1,RASGRP1,TIAM1_x000D_
GO:0099094	0.00810135	5.4078	0.791574	4	63	ligand-gated cation channel activity	GO_MF	ABCC8,ASIC1,CHRNA3,CHRNA4,GRIN2D,JPH1,KCNJ4,KCNJ8_x000D_
GO:0017171	0.00938217	2.66465	3.53477	9	277	serine hydrolase activity	GO_MF	ACHE,CTSS,IGKC,LPAL2,PRSS36,PRSS41,TLL1,TLL2,TMPRSS2_x000D_
GO:0005261	0.0101342	4.03092	1.3084	5	107	cation channel activity	GO_MF	ABCC8,ABCC9,ASIC1,CHRNA3,CHRNA4,GRIN2D,JPH1,KCNC1,KCNJ4,KCNJ8,KCNMB4,KCNQ3,OPRM1,OTOP2,PKD2L2,SCN5A,TMC2_x000D_
GO:0008528	0.0108248	3.40357	1.85033	6	145	G protein-coupled peptide receptor activity	GO_MF	GHRHR,GPR37L1,NPFFR2,OPRM1,RAMP3,SORCS2_x000D_
GO:0015250	0.0133355	13.0007	0.178652	2	14	water channel activity	GO_MF	AQP10,AQP11_x000D_
GO:0004252	0.0151744	2.61492	3.19022	8	250	serine-type endopeptidase activity	GO_MF	CTSS,IGKC,LPAL2,PRSS36,PRSS41,TLL1,TLL2,TMPRSS2_x000D_
GO:0005102	0.0158116	1.5813	20.7864	31	1636	signaling receptor binding	GO_MF	APOA5,BAAT,BANK1,CDK5R1,CSF2,CSPG5,EBI3,FERMT3,FOXL2,FRMD5,GPHA2,HNF4A,ICOSLG,IGKC,IL1B,IL34,KCNJ8,LCP1,MEGF10,MOG,NETO1,NPFFR2,PILRA,RARB,SCT,SELPLG,SHC4,TIAM1,TLR2,TNF,UCN2,UCN3_x000D_
GO:0022848	0.0172938	11.1422	0.204174	2	16	acetylcholine-gated cation-selective channel activity	GO_MF	CHRNA3,CHRNA4_x000D_
GO:0071837	0.0172938	11.1422	0.204174	2	16	HMG box domain binding	GO_MF	MEOX1,PAX6_x000D_
GO:0038023	0.0173899	1.60461	18.4459	28	1470	signaling receptor activity	GO_MF	ABCC8,ABCC9,CHRM3,CHRNA3,CHRNA4,CSF1R,EBI3,EPHA1,FGFR3,FOLR2,FOLR3,GHRHR,GPR151,GPR37L1,GRIN2D,HLA-DQA1,HNF4A,HTR1D,LILRB5,NPFFR2,OPRM1,PGLYRP2,PGLYRP4,PTAFR,PTPRR,RAMP3,RARB,RGR,RTN4R,SORCS2,TLR2,TNFRSF9_x000D_
GO:0030676	0.0194368	10.3988	0.216935	2	17	Rac guanyl-nucleotide exchange factor activity	GO_MF	EPS8L3,TIAM1_x000D_
GO:0051428	0.0215118	9.7911	0.228714	2	18	peptide hormone receptor binding	GO_MF	GPHA2,UCN2,UCN3_x000D_
GO:0044325	0.0221157	3.27405	1.59511	5	125	ion channel binding	GO_MF	ABCC8,ABCC9,KCNC1,RIMS2,SCN5A_x000D_
GO:0031267	0.0255749	1.91537	7.05677	13	553	small GTPase binding	GO_MF	ADPRH,ARHGEF15,C15orf62,CSF2,EPS8L3,FGFR3,GRIN2D,LAT,MOBP,PLEKHG1,RASGRP1,RIMS2,TIAM1_x000D_
GO:0030506	0.0264843	8.66418	0.255218	2	20	ankyrin binding	GO_MF	RHCG,SCN5A_x000D_
GO:0015459	0.0286644	4.78709	0.663566	3	52	potassium channel regulator activity	GO_MF	ABCC9,KCNMB4,WNK4_x000D_
GO:0005544	0.0301061	4.69108	0.676327	3	53	calcium-dependent phospholipid binding	GO_MF	CPNE6,CPNE9,SYT8_x000D_
GO:0001786	0.0315855	4.59883	0.689088	3	54	phosphatidylserine binding	GO_MF	CPNE6,RASGRP1,SYT8_x000D_
GO:0022843	0.0316688	4.59199	0.689694	3	55	voltage-gated cation channel activity	GO_MF	ABCC8,GRIN2D,KCNC1,KCNJ4,KCNJ8,KCNQ3,OPRM1,TMC2_x000D_
GO:0005537	0.0316689	7.79686	0.28074	2	22	mannose binding	GO_MF	COL20A1,LMAN1L_x000D_
GO:0015085	0.0329349	2.92961	1.77376	5	139	calcium ion transmembrane transporter activity	GO_MF	GRIN2D,JPH1,OPRM1,PKD2L2,TMC2_x000D_
GO:0017134	0.0343986	7.42515	0.2935	2	23	fibroblast growth factor binding	GO_MF	FGFR3,SCN5A_x000D_
GO:0001540	0.0429818	4.04217	0.778414	3	61	amyloid-beta binding	GO_MF	ACHE,ATP1A3,TLR2_x000D_
GO:0022824	0.0429818	4.04217	0.778414	3	61	transmitter-gated ion channel activity	GO_MF	CHRNA3,CHRNA4,GRIN2D_x000D_
GO:0008574	0.0431047	6.49589	0.331783	2	26	ATP-dependent microtubule motor activity, plus-end-directed	GO_MF	DNAI1,KIF1A_x000D_
GO:0031210	0.0431047	6.49589	0.331783	2	26	phosphatidylcholine binding	GO_MF	APOA5,RASGRP1_x000D_
GO:0003779	0.0442581	1.92339	5.37233	10	421	actin binding	GO_MF	CDK5R1,EPS8L3,FAM107A,FHDC1,LCP1,MISP,MOBP,MYBPC1,MYO7B,TNNT3_x000D_
GO:0099604	0.0461703	6.2357	0.344544	2	27	ligand-gated calcium channel activity	GO_MF	GRIN2D,JPH1_x000D_

## Sheet: C_GO_476_UdRPC
GOID	Pvalue	OddsRatio	ExpCount	Count	Size	Term	GO_type	genes_x000D_
GO:0061092	6.60744e-06	Inf	0.0564538	3	3	positive regulation of phospholipid translocation	GO_BP	ABCB4,ATP8A1,ATP8A2_x000D_
GO:2001138	8.12802e-06	52.7355	0.150543	4	8	regulation of phospholipid transport	GO_BP	ABCA7,ABCB4,ATP8A1,ATP8A2_x000D_
GO:0016338	5.83657e-05	14.6801	0.432812	5	23	calcium-independent cell-cell adhesion via plasma membrane cell-adhesion molecules	GO_BP	CLDN10,CLDN16,CLDN2,CLDN23,CLDN7_x000D_
GO:0034204	0.000131636	12.0083	0.508084	5	27	lipid translocation	GO_BP	ABCA7,ABCB1,ABCB4,ATP8A1,ATP8A2_x000D_
GO:1903793	0.000268003	7.56182	0.903261	6	48	positive regulation of anion transport	GO_BP	ABCA7,ABCB1,ABCB4,ADORA2A,ATP8A1,ATP8A2_x000D_
GO:0019374	0.000510121	26.2884	0.169361	3	9	galactolipid metabolic process	GO_BP	ALDH5A1,GAL3ST1,UGT8_x000D_
GO:1901137	0.00113267	2.03955	13.4925	26	717	carbohydrate derivative biosynthetic process	GO_BP	ABCA7,ABO,ACAN,ADCY2,ADORA2A,B3GAT1,CHST9,DPY19L2,ELOVL7,GAL3ST1,GAL3ST3,GCNT2,GCNT3,HS3ST1,HS6ST2,ITM2A,MGAT3,MGAT4A,MT3,MUC4,MUCL1,OGDHL,PDK3,PFKFB1,PRKAA2,UGT8_x000D_
GO:0032230	0.00128107	17.5227	0.225815	3	12	positive regulation of synaptic transmission, GABAergic	GO_BP	ADORA2A,ADRA1A,CA2_x000D_
GO:0009100	0.00221117	2.37335	7.09676	16	379	glycoprotein metabolic process	GO_BP	ABCA7,ABO,ACAN,B3GAT1,CHST9,DPY19L2,GAL3ST1,GAL3ST3,GCNT2,GCNT3,HS6ST2,IHH,ITM2A,MGAT3,MGAT4A,MT3,MUC4,MUCL1_x000D_
GO:0048858	0.00223412	2.02402	11.9682	23	636	cell projection morphogenesis	GO_BP	ADORA2A,ATP8A2,COBL,FZD3,GRB7,HOXA2,KLK8,LHX1,MT3,NGEF,NRCAM,NTNG1,PACSIN1,POU4F1,PPP1R9A,PRKCQ,RASAL1,RPS6KA5,SEMA4A,SHANK2,SYT2,UGT8,ZSWIM5_x000D_
GO:0010273	0.0025408	13.1399	0.282269	3	15	detoxification of copper ion	GO_BP	MT1B,MT1H,MT3_x000D_
GO:0032501	0.00317707	1.35506	139.694	165	7473	multicellular organismal process	GO_BP	ABCA7,ABCC6,ACAN,ACSM3,ADCY2,ADORA2A,ADRA1A,ALAS2,ALDH5A1,ALOX15B,ALPK3,ALX4,AMBP,ASIC2,ATCAY,ATP8A1,ATP8A2,BLM,BMP8B,BTC,C1orf127,CA2,CATSPER1,CCDC103,CCDC151,CDC25C,CDHR1,CDX1,CHRDL1,CLDN16,CLMN,CMKLR1,COBL,COL11A2,COL9A1,CPAMD8,CRYGS,CRYM,CTTNBP2,CXCR5,CYP2J2,DMBT1,DOCK2,DPY19L2,E2F2,ELSPBP1,ENPEP,ENTPD2,ESPNL,ESRP2,ESRRG,EVPL,EVX2,FGF4,FGR,FOXE3,FZD3,GAL3ST1,GCNT2,GCNT3,GNG7,GRB7,HILS1,HNF1A,…
GO:0015748	0.00332988	3.85945	1.93825	7	103	organophosphate ester transport	GO_BP	ABCA7,ABCB1,ABCB4,ATP8A1,ATP8A2,PITPNM3,SLC17A3_x000D_
GO:0006682	0.00340085	34.9557	0.0940897	2	5	galactosylceramide biosynthetic process	GO_BP	GAL3ST1,UGT8_x000D_
GO:0007379	0.00369291	11.2615	0.319905	3	17	segment specification	GO_BP	COBL,HOXA2,IRX2_x000D_
GO:0097501	0.00369291	11.2615	0.319905	3	17	stress response to metal ion	GO_BP	MT1B,MT1H,MT3_x000D_
GO:0032502	0.00377481	1.35469	116.897	141	6212	developmental process	GO_BP	ACAN,ADORA2A,ADRA1A,ALAS2,ALDH5A1,ALOX15B,ALPK3,ALX4,ASIC2,ATCAY,ATP8A2,BAIAP3,BLM,BMP8B,BTC,C1orf127,CA2,CATSPER1,CCDC103,CCDC151,CDHR1,CDHR5,CDKL2,CDX1,CHRDL1,CLMN,CMKLR1,COBL,COL11A2,COL9A1,CPAMD8,CRYGS,CST6,CTTNBP2,CXCR5,DMBT1,DOCK2,DPY19L2,E2F2,ELSPBP1,ENPEP,ESRP2,EVPL,EVX2,FGF22,FGF4,FGR,FOXE3,FZD3,GAL3ST1,GCNT2,GCNT3,GRB7,HILS1,HNF1A,HOOK1,HOXA2,HOXC4,HOXC8,IHH,IL6R,IRF6,IRX2,ITM2A,KCNQ4,K…
GO:0006677	0.00437028	10.5101	0.338723	3	18	glycosylceramide metabolic process	GO_BP	ALDH5A1,GAL3ST1,UGT8_x000D_
GO:0099643	0.00444009	3.02235	3.14259	9	167	signal release from synapse	GO_BP	ADORA2A,ADRA1A,BAIAP3,MCTP1,PCLO,PPP1R9A,PTPRN2,SYT12,SYT2_x000D_
GO:0048812	0.00483031	2.98109	3.18377	9	172	neuron projection morphogenesis	GO_BP	ADORA2A,ATP8A2,COBL,FZD3,GRB7,HOXA2,KLK8,LHX1,MT3,NGEF,NRCAM,NTNG1,PACSIN1,POU4F1,PPP1R9A,PRKCQ,RASAL1,RPS6KA5,SEMA4A,SHANK2,SYT2,UGT8,ZSWIM5_x000D_
GO:0042985	0.00503794	26.2153	0.112908	2	6	negative regulation of amyloid precursor protein biosynthetic process	GO_BP	ABCA7,ITM2A_x000D_
GO:0030166	0.00537096	4.79459	1.12908	5	60	proteoglycan biosynthetic process	GO_BP	ACAN,B3GAT1,CHST9,GAL3ST3,HS6ST2_x000D_
GO:0035082	0.00576227	4.70872	1.14789	5	61	axoneme assembly	GO_BP	CCDC103,CCDC151,CCDC65,RSPH1,RSPH9_x000D_
GO:0006855	0.00598671	3.9125	1.63716	6	87	drug transmembrane transport	GO_BP	ABCB1,ABCB4,SLC13A5,SLC17A3,SLC17A7,SLC47A1_x000D_
GO:0070233	0.00683257	8.757	0.395177	3	21	negative regulation of T cell apoptotic process	GO_BP	BLM,PRKCQ,TNFRSF4_x000D_
GO:0032989	0.00742976	1.65372	20.3045	32	1079	cellular component morphogenesis	GO_BP	ADORA2A,ATP8A2,CDHR1,COBL,FGR,FZD3,GRB7,HOXA2,IHH,KLK8,LHX1,MT3,MYLK3,NCMAP,NGEF,NOTCH4,NRCAM,NTNG1,PACSIN1,POU4F1,PPP1R9A,PRKCQ,RASAL1,RHOV,RPS6KA5,SEMA4A,SHANK2,STRC,SYT2,UGT8,VSIG1,ZSWIM5_x000D_
GO:0006486	0.00798394	2.44548	4.70448	11	250	protein glycosylation	GO_BP	ABO,B3GAT1,DPY19L2,GAL3ST1,GCNT2,GCNT3,MGAT3,MGAT4A,MT3,MUC4,MUCL1_x000D_
GO:0051446	0.00884957	7.88043	0.432812	3	23	positive regulation of meiotic cell cycle	GO_BP	CDC25C,NPM2,OVOL1_x000D_
GO:0071294	0.00884957	7.88043	0.432812	3	23	cellular response to zinc ion	GO_BP	MT1B,MT1H,MT3_x000D_
GO:0001714	0.0091726	17.475	0.150543	2	8	endodermal cell fate specification	GO_BP	POU5F1,SOX2_x000D_
GO:0070327	0.0091726	17.475	0.150543	2	8	thyroid hormone transport	GO_BP	CRYM,SLC16A10_x000D_
GO:1901993	0.0091726	17.475	0.150543	2	8	regulation of meiotic cell cycle phase transition	GO_BP	CDC25C,OVOL1_x000D_
GO:0070085	0.0102458	2.35554	4.87384	11	259	glycosylation	GO_BP	ABO,B3GAT1,DPY19L2,GAL3ST1,GCNT2,GCNT3,MGAT3,MGAT4A,MT3,MUC4,MUCL1_x000D_
GO:0006836	0.0129711	2.27191	5.04321	11	268	neurotransmitter transport	GO_BP	ADORA2A,ADRA1A,BAIAP3,MAOB,MCTP1,PCLO,PPP1R9A,PTPRN2,SLC17A7,SYT12,SYT2_x000D_
GO:0007416	0.013023	2.69584	3.10496	8	165	synapse assembly	GO_BP	ASIC2,NRCAM,PCLO,POU4F1,PPP1R9A,RAB17,SHANK2,SYNDIG1_x000D_
GO:0060079	0.0132283	3.26424	1.93825	6	103	excitatory postsynaptic potential	GO_BP	ADORA2A,NPFF,P2RX6,PPP1R9A,SHANK2,SLC17A7_x000D_
GO:0071280	0.0138307	6.56558	0.508084	3	27	cellular response to copper ion	GO_BP	MT1B,MT1H,MT3_x000D_
GO:0048703	0.0143798	13.1048	0.188179	2	10	embryonic viscerocranium morphogenesis	GO_BP	HOXA2,LHX1_x000D_
GO:1904779	0.0143798	13.1048	0.188179	2	10	regulation of protein localization to centrosome	GO_BP	CEP72,PARD6A_x000D_
GO:2001225	0.0143798	13.1048	0.188179	2	10	regulation of chloride transport	GO_BP	ABCB1,CA2_x000D_
GO:0046928	0.0150681	3.16579	1.9947	6	106	regulation of neurotransmitter secretion	GO_BP	ADORA2A,ADRA1A,BAIAP3,MCTP1,PPP1R9A,SYT12_x000D_
GO:0019369	0.0153801	4.47749	0.959714	4	51	arachidonic acid metabolic process	GO_BP	ALOX15B,CYP2A13,CYP2J2,FAAH_x000D_
GO:0010817	0.0168772	1.83894	9.59714	17	510	regulation of hormone levels	GO_BP	ADORA2A,BAIAP3,BCO2,CHST9,CRYM,ENHO,ENPEP,HNF1A,ILDR1,NPFF,PASK,PCLO,PRLHR,PTPRN2,RDH12,SLC16A10,VSNL1_x000D_
GO:0044341	0.0173588	11.648	0.206997	2	11	sodium-dependent phosphate transport	GO_BP	SLC17A7,SLC34A2_x000D_
GO:0048488	0.0175054	4.29426	0.99735	4	53	synaptic vesicle endocytosis	GO_BP	DNAJC6,PACSIN1,SLC17A7,SYT2_x000D_
GO:0007605	0.0180571	2.73857	2.67215	7	142	sensory perception of sound	GO_BP	ASIC2,COL11A2,CRYM,ESPNL,HOMER2,KCNQ4,STRC_x000D_
GO:0015698	0.0190945	2.50275	3.33077	8	177	inorganic anion transport	GO_BP	ABCB1,ABCC6,ANO7,CA2,P2RY6,SLC17A3,SLC17A7,SLC34A2_x000D_
GO:0048562	0.0191314	2.13685	5.34429	11	284	embryonic organ morphogenesis	GO_BP	ALX4,ATP8A2,CCDC103,FZD3,HOXA2,HOXC4,IHH,KCNQ4,LHX1,STRC,WNT16_x000D_
GO:0051196	0.0198052	4.1254	1.03499	4	55	regulation of coenzyme metabolic process	GO_BP	ACMSD,PDK3,PFKFB1,PRKAA2_x000D_
GO:0006171	0.0205744	10.4827	0.225815	2	12	cAMP biosynthetic process	GO_BP	ADCY2,ADORA2A_x000D_
GO:0042908	0.0205744	10.4827	0.225815	2	12	xenobiotic transport	GO_BP	ABCB1,ABCB4_x000D_
GO:0035587	0.0218954	5.43208	0.602174	3	32	purinergic receptor signaling pathway	GO_BP	ADORA2A,P2RX6,P2RY6_x000D_
GO:2000758	0.0218954	5.43208	0.602174	3	32	positive regulation of peptidyl-lysine acetylation	GO_BP	NAP1L2,PRKAA2,RPS6KA5_x000D_
GO:0035563	0.0240166	9.52916	0.244633	2	13	positive regulation of chromatin binding	GO_BP	CDT1,KDM4D_x000D_
GO:0046459	0.0240166	9.52916	0.244633	2	13	short-chain fatty acid metabolic process	GO_BP	ACOT4,ALDH5A1_x000D_
GO:0001894	0.0244478	2.24574	4.15876	9	221	tissue homeostasis	GO_BP	CA2,CDHR1,GCNT2,HOMER2,IHH,MUC4,NXNL2,RDH12,VSIG1_x000D_
GO:0032370	0.0249413	3.82452	1.11026	4	59	positive regulation of lipid transport	GO_BP	ABCA7,ABCB4,ATP8A1,ATP8A2_x000D_
GO:0003382	0.025702	5.08107	0.63981	3	34	epithelial cell morphogenesis	GO_BP	IHH,NOTCH4,VSIG1_x000D_
GO:0017156	0.0259131	2.53069	2.87914	7	153	calcium ion regulated exocytosis	GO_BP	ADORA2A,ADRA1A,BAIAP3,PCLO,SCIN,SYT12,SYT2_x000D_
GO:0003407	0.0263392	3.75602	1.12908	4	60	neural retina development	GO_BP	ATP8A2,IHH,LHX1,SLC17A7_x000D_
GO:0018149	0.0263392	3.75602	1.12908	4	60	peptide cross-linking	GO_BP	ABCA7,EVPL,LCE1E,SPRR2F_x000D_
GO:0008544	0.027392	1.79997	8.61861	15	458	epidermis development	GO_BP	ALOX15B,ALX4,CST6,EVPL,FZD3,IRF6,KLK7,KRTAP10-4,KRTAP8-1,LCE1E,OVOL1,PKP1,SPRR2F,STRC,WNT16_x000D_
GO:0035810	0.0276758	8.73459	0.263451	2	14	positive regulation of urine volume	GO_BP	ADORA2A,BTC_x000D_
GO:0060969	0.0277297	4.92201	0.658628	3	35	negative regulation of gene silencing	GO_BP	HILS1,HIST1H1E,POU5F1_x000D_
GO:0046635	0.0277832	3.68992	1.14789	4	61	positive regulation of alpha-beta T cell activation	GO_BP	BLM,IHH,IL6R,PRKCQ_x000D_
GO:0015711	0.0283179	1.79168	8.65625	15	460	organic anion transport	GO_BP	ABCA7,ABCB1,ABCB4,ADORA2A,ATP8A1,ATP8A2,CA13,CA2,PITPNM3,SLC13A5,SLC16A10,SLC17A3,SLC17A7,SLC3A1,SLCO4C1_x000D_
GO:0006882	0.0298402	4.7726	0.677446	3	36	cellular zinc ion homeostasis	GO_BP	MT1B,MT1H,MT3_x000D_
GO:0060285	0.0312688	8.10152	0.280935	2	15	cilium-dependent cell motility	GO_BP	CATSPER1,CCDC65,DNAH2,RSPH9_x000D_
GO:0048666	0.0314991	1.49215	20.154	29	1071	neuron development	GO_BP	ADORA2A,ATCAY,ATP8A2,CDHR1,CLMN,COBL,FZD3,GRB7,HOXA2,IHH,KLK8,LHX1,MT3,NGEF,NRCAM,NTNG1,PACSIN1,POU4F1,PPP1R9A,PRKCQ,RAB17,RASAL1,RPS6KA5,SEMA4A,SHANK2,STRC,SYT2,UGT8,ZSWIM5_x000D_
GO:0003352	0.0315428	8.06225	0.282269	2	15	regulation of cilium movement	GO_BP	CATSPER1,CCDC65_x000D_
GO:0034116	0.0315428	8.06225	0.282269	2	15	positive regulation of heterotypic cell-cell adhesion	GO_BP	GCNT2,SKAP1_x000D_
GO:0046519	0.0315428	8.06225	0.282269	2	15	sphingoid metabolic process	GO_BP	SGPP2,SPTLC3_x000D_
GO:0097091	0.0315428	8.06225	0.282269	2	15	synaptic vesicle clustering	GO_BP	PCLO,SYNDIG1_x000D_
GO:1903019	0.0315428	8.06225	0.282269	2	15	negative regulation of glycoprotein metabolic process	GO_BP	ABCA7,ITM2A_x000D_
GO:0045494	0.032033	4.63197	0.696263	3	37	photoreceptor cell maintenance	GO_BP	CDHR1,NXNL2,RDH12_x000D_
GO:0071276	0.032033	4.63197	0.696263	3	37	cellular response to cadmium ion	GO_BP	MT1B,MT1H,MT3_x000D_
GO:0065008	0.0320494	1.29379	62.2316	76	3381	regulation of biological quality	GO_BP	ABCA7,ABCB1,ABCB4,ACSM3,ADCY2,ADORA2A,ADRA1A,ALAS2,ALDH5A1,ANO7,ASIC2,ATP8A1,ATP8A2,BAIAP3,BCO2,BLM,BTC,CA2,CATSPER1,CDHR1,CDHR5,CHST9,CLDN16,CLMN,CMKLR1,CRYM,CTTNBP2,CXCR5,ENHO,ENPEP,ENTPD2,ESRRG,FGR,GCNT2,GLDC,HNF1A,HOMER2,IHH,ILDR1,KCNMB3,KCNT1,KLK8,MAOB,MCTP1,MT1B,MT1H,MT3,MUC4,MYL3,MYLK3,NELL2,NGEF,NOVA1,NPFF,NPY1R,NRCAM,NXNL2,P2RX6,P2RY6,PASK,PCLO,PDE6B,PDK3,PKIB,PLAC8,PPP1R9A,PRKAA2,PRKCQ,…
GO:0051785	0.032394	3.50484	1.20435	4	64	positive regulation of nuclear division	GO_BP	BTC,CDT1,NPM2,TGFA_x000D_
GO:0051302	0.0338684	2.38256	3.0485	7	162	regulation of cell division	GO_BP	BLM,BTC,CXCR5,FGF4,NAP1L2,POU5F1,TGFA_x000D_
GO:0010559	0.0343078	4.49938	0.715081	3	38	regulation of glycoprotein biosynthetic process	GO_BP	ABCA7,ITM2A,MT3_x000D_
GO:0098609	0.0344224	1.55468	15.299	23	813	cell-cell adhesion	GO_BP	ADORA2A,BLM,CDHR1,CDHR5,CLDN10,CLDN16,CLDN2,CLDN23,CLDN7,CRNN,GCNT2,GRAP2,IHH,IL6R,MPZL2,NRCAM,NTNG1,PCDHA11,PCDHGB2,PKP1,PRKCQ,SKAP1,SOX2_x000D_
GO:0048705	0.0351159	2.09559	4.44103	9	236	skeletal system morphogenesis	GO_BP	ACAN,ALX4,CDX1,FGF4,HOXA2,HOXC4,HOXC8,IHH,LHX1_x000D_
GO:0016584	0.0356083	7.48596	0.301087	2	16	nucleosome positioning	GO_BP	HILS1,HIST1H1E_x000D_
GO:0071380	0.0356083	7.48596	0.301087	2	16	cellular response to prostaglandin E stimulus	GO_BP	P2RY6,PRKAA2_x000D_
GO:0044255	0.0359986	1.47264	20.3986	29	1084	cellular lipid metabolic process	GO_BP	ABO,ACOT4,ACSM3,ACSM5,ALDH5A1,ALOX15B,BCO2,BTC,CYP2A13,CYP2J2,DGAT2L6,ELOVL7,FAAH,FAM135B,FGF22,FGF4,FGR,GAL3ST1,GAL3ST3,GDPD3,MT3,PDK3,PIK3AP1,PITPNM3,PRKAA2,RDH12,SGPP2,SPTLC3,UGT8_x000D_
GO:0009268	0.0366641	4.37415	0.733899	3	39	response to pH	GO_BP	ASIC2,CA2,SST_x000D_
GO:0007268	0.0377336	1.59037	12.9844	20	690	chemical synaptic transmission	GO_BP	ADORA2A,ADRA1A,ASIC2,BAIAP3,CA2,CHRM4,MCTP1,NOVA1,NPFF,NTNG1,P2RX6,PCLO,PPP1R9A,PTPRN2,RAB26,SHANK2,SLC17A7,SST,SYT12,SYT2_x000D_
GO:0048880	0.0385285	1.84265	6.718	12	357	sensory system development	GO_BP	ATP8A2,CHRDL1,CPAMD8,CRYGS,FOXE3,IHH,LHX1,PDE6B,POU4F1,SLC17A7,SOX2,WNT16_x000D_
GO:0006022	0.038922	2.30746	3.14259	7	167	aminoglycan metabolic process	GO_BP	ACAN,B3GAT1,CHST9,GAL3ST3,GCNT2,HS3ST1,HS6ST2_x000D_
GO:0043616	0.0391013	4.2557	0.752717	3	40	keratinocyte proliferation	GO_BP	IRF6,KLK8,WNT16_x000D_
GO:0006811	0.0395495	1.49192	18.0431	26	978	ion transport	GO_BP	ABCA7,ABCB1,ABCB4,ABCC6,ADORA2A,ADRA1A,ANO7,ASIC2,ATP8A1,ATP8A2,CA13,CA2,CATSPER1,CLDN10,CLDN16,COX6A2,HOMER2,KCNIP1,KCNMB3,KCNQ4,KCNT1,MAOB,MT3,P2RX6,P2RY6,PITPNM3,PLLP,RHBG,S100A1,SCNN1A,SGK2,SHANK2,SLC13A5,SLC16A10,SLC17A3,SLC17A7,SLC24A5,SLC34A2,SLC3A1,SLC47A1,SLCO4C1,STEAP2,SYT12,SYT2,TMC4_x000D_
GO:0036158	0.0398637	6.98651	0.319905	2	17	outer dynein arm assembly	GO_BP	CCDC103,CCDC151_x000D_
GO:0042753	0.0398637	6.98651	0.319905	2	17	positive regulation of circadian rhythm	GO_BP	ADORA2A,RORC_x000D_
GO:0043651	0.0398637	6.98651	0.319905	2	17	linoleic acid metabolic process	GO_BP	ALOX15B,CYP2J2_x000D_
GO:0050884	0.0398637	6.98651	0.319905	2	17	neuromuscular process controlling posture	GO_BP	ATP8A2,POU4F1_x000D_
GO:1904355	0.0398637	6.98651	0.319905	2	17	positive regulation of telomere capping	GO_BP	PKIB,PRKCQ_x000D_
GO:0030148	0.0405695	2.76968	1.88179	5	100	sphingolipid biosynthetic process	GO_BP	ELOVL7,GAL3ST1,SGPP2,SPTLC3,UGT8_x000D_
GO:0099003	0.0406104	2.14368	3.85768	8	205	vesicle-mediated transport in synapse	GO_BP	ADORA2A,ADRA1A,DNAJC6,PACSIN1,PCLO,SLC17A7,SYT12,SYT2_x000D_
GO:1900006	0.041017	3.23435	1.29844	4	69	positive regulation of dendrite development	GO_BP	COBL,PACSIN1,PPP1R9A,SHANK2_x000D_
GO:0099537	0.0416893	1.57089	13.1349	20	698	trans-synaptic signaling	GO_BP	ADORA2A,ADRA1A,ASIC2,BAIAP3,CA2,CHRM4,MCTP1,NOVA1,NPFF,NTNG1,P2RX6,PCLO,PPP1R9A,PTPRN2,RAB26,SHANK2,SLC17A7,SST,SYT12,SYT2_x000D_
GO:0007631	0.0420526	2.74068	1.90061	5	101	feeding behavior	GO_BP	ADORA2A,ATP8A2,NPY1R,POU4F1,PRLHR_x000D_
GO:0071241	0.042589	2.1219	3.89531	8	207	cellular response to inorganic substance	GO_BP	BLM,MT1B,MT1H,MT3,PRKAA2,RASAL1,SYT12,SYT2_x000D_
GO:0048731	0.0434668	1.24434	81.9991	96	4426	system development	GO_BP	ACAN,ADORA2A,ADRA1A,ALAS2,ALDH5A1,ALOX15B,ALPK3,ALX4,ASIC2,ATCAY,ATP8A2,BLM,BMP8B,C1orf127,CA2,CCDC103,CDHR1,CDX1,CHRDL1,CLMN,CMKLR1,COBL,COL11A2,COL9A1,CPAMD8,CRYGS,CTTNBP2,CXCR5,DOCK2,E2F2,ENPEP,ESRP2,EVPL,FGF4,FOXE3,FZD3,GAL3ST1,GCNT2,GCNT3,GRB7,HNF1A,HOXA2,HOXC4,HOXC8,IHH,IL6R,IRF6,IRX2,ITM2A,KCNQ4,KLK4,KLK8,KRTAP10-4,KRTAP8-1,LCE1E,LHX1,LYL1,MACROD2,MAOB,MESP2,MT3,MYL3,MYLK3,N4BP3,NAP1L2,NCM…
GO:0045910	0.044216	4.03701	0.790353	3	42	negative regulation of DNA recombination	GO_BP	BLM,HILS1,HIST1H1E_x000D_
GO:0006521	0.0443004	6.54949	0.338723	2	18	regulation of cellular amino acid metabolic process	GO_BP	ACMSD,ATCAY_x000D_
GO:0032095	0.0443004	6.54949	0.338723	2	18	regulation of response to food	GO_BP	MT3,NPFF_x000D_
GO:0034063	0.0443004	6.54949	0.338723	2	18	stress granule assembly	GO_BP	GRB7,PRKAA2_x000D_
GO:0070633	0.0443004	6.54949	0.338723	2	18	transepithelial transport	GO_BP	P2RY6,RHBG_x000D_
GO:0048878	0.0444316	1.43268	21.6594	30	1151	chemical homeostasis	GO_BP	ABCB4,ACSM3,ADCY2,ADORA2A,ADRA1A,ALAS2,BAIAP3,CA2,CLDN16,CMKLR1,CXCR5,ENHO,HNF1A,HOMER2,MT1B,MT1H,MT3,NPFF,P2RY6,PDE6B,PDK3,PRKAA2,PTGER1,PTPRN2,SCNN1A,SLC24A5,SLC34A2,STEAP2,TMEM178A,VSNL1_x000D_
GO:0043269	0.0445875	1.57702	12.4198	19	660	regulation of ion transport	GO_BP	ABCA7,ABCB1,ABCB4,ADORA2A,ASIC2,ATP8A1,ATP8A2,CA2,CATSPER1,CLDN10,HOMER2,KCNIP1,KCNQ4,MAOB,P2RY6,S100A1,SHANK2,SYT12,SYT2_x000D_
GO:0019725	0.044637	1.48306	17.4066	25	925	cellular homeostasis	GO_BP	ADRA1A,ALAS2,BAIAP3,CA2,CLDN16,CMKLR1,CXCR5,MT1B,MT1H,MT3,NELL2,NPFF,P2RY6,PDE6B,PDK3,PRKAA2,PTGER1,PTPRN2,SGCZ,SLC17A7,SLC24A5,SLC34A2,TMEM178A,TXNDC2,VSNL1_x000D_
GO:0006637	0.0451161	2.68445	1.93825	5	103	acyl-CoA metabolic process	GO_BP	ACOT4,ACSM3,ACSM5,ELOVL7,PDK3_x000D_
GO:0007409	0.0456764	1.70652	8.44925	14	449	axonogenesis	GO_BP	ATP8A2,COBL,FZD3,GRB7,HOXA2,LHX1,MT3,NRCAM,NTNG1,POU4F1,PRKCQ,RPS6KA5,SEMA4A,ZSWIM5_x000D_
GO:0033865	0.0464863	2.39407	2.59687	6	138	nucleoside bisphosphate metabolic process	GO_BP	ACOT4,ACSM3,ACSM5,ELOVL7,PDK3,SULT1C2_x000D_
GO:0001756	0.0467565	3.09114	1.35489	4	72	somitogenesis	GO_BP	CDX1,COBL,LHX1,MESP2_x000D_
GO:0046631	0.0475631	3.07229	1.36241	4	73	alpha-beta T cell activation	GO_BP	ADORA2A,BLM,DOCK2,IHH,IL6R,PRKCQ,RORC,SEMA4A_x000D_
GO:0090596	0.0486216	1.96405	4.7233	9	251	sensory organ morphogenesis	GO_BP	ATP8A2,FOXE3,FZD3,HOXA2,IHH,KCNQ4,LHX1,STRC,WNT16_x000D_
GO:0042135	0.0486678	6.18142	0.356552	2	19	neurotransmitter catabolic process	GO_BP	ALDH5A1,GLDC,MAOB_x000D_
GO:0042789	0.0489101	6.16389	0.357541	2	19	mRNA transcription by RNA polymerase II	GO_BP	FOXE3,POU5F1_x000D_
GO:0045821	0.0489101	6.16389	0.357541	2	19	positive regulation of glycolytic process	GO_BP	PFKFB1,PRKAA2_x000D_
GO:0060294	0.0489101	6.16389	0.357541	2	19	cilium movement involved in cell motility	GO_BP	CATSPER1,RSPH9_x000D_
GO:0043588	0.0489523	1.72594	7.75299	13	412	skin development	GO_BP	ALOX15B,ALX4,ATP8A2,EVPL,FZD3,IRF6,KRTAP10-4,KRTAP8-1,LCE1E,OVOL1,PKP1,SPRR2F,WNT16_x000D_
GO:0005975	0.048996	1.60098	10.9332	17	581	carbohydrate metabolic process	GO_BP	ABO,ALDH5A1,B3GAT1,CHST9,GAL3ST3,GCNT3,GLB1L3,MDH1B,NPY1R,OGDHL,P2RY6,PASK,PDK3,PFKFB1,PRKAA2,RORC,SLC3A1_x000D_
GO:0035725	0.0492394	2.35808	2.63451	6	140	sodium ion transmembrane transport	GO_BP	ASIC2,SCNN1A,SLC17A3,SLC17A7,SLC24A5,SLC34A2_x000D_
GO:0042737	0.0492394	2.35808	2.63451	6	140	drug catabolic process	GO_BP	CYP2A13,CYP2J2,GLDC,MAOB,MT3,OXCT2_x000D_
GO:0006024	0.0499552	2.60428	1.9947	5	106	glycosaminoglycan biosynthetic process	GO_BP	ACAN,CHST9,GCNT2,HS3ST1,HS6ST2_x000D_
GO:0042995	1.57609e-05	1.84186	40.7768	68	2132	cell projection	GO_CC	ABCA7,ADCY2,ADORA2A,ASIC2,ATCAY,ATP8A2,CA2,CATSPER1,CCDC103,CCDC151,CCDC65,CDHR1,CDHR5,CEP128,CHRM4,COBL,CTTNBP2,DNAH2,ESPNL,FBXL13,FGR,FRMD4B,FZD3,GRB7,HOMER2,IQCA1,IQCD,KCNIP1,KIF17,KLHL14,MT3,N4BP3,NCMAP,NGEF,NPFF,NRCAM,OXCT2,P2RX6,PACSIN1,PARD6A,PDE6B,PIFO,PITPNM3,POU4F1,PPP1R9A,PRKAA2,PTPRN2,RAB17,RHOV,RINL,RSPH1,RSPH9,S100A1,S100P,SCIN,SCNN1A,SH2B2,SHANK2,SKAP1,SLC17A3,SLC17A7,SLC34A2,SLC3A…
GO:0031514	0.000160296	3.81978	3.38532	12	177	motile cilium	GO_CC	CATSPER1,CCDC103,CCDC65,DNAH2,FBXL13,IQCA1,IQCD,OXCT2,RSPH1,RSPH9,SCNN1A,TSGA10_x000D_
GO:0016324	0.000312146	2.89056	5.89084	16	308	apical plasma membrane	GO_CC	ABCB1,ABCB4,ABCC6,CDHR5,ENPEP,FZD3,IL6R,MREG,OCLN,P2RY6,PARD6A,RAB17,SCNN1A,SHANK2,SLC17A3,SLC34A2_x000D_
GO:0098862	0.000460982	3.90445	2.75416	10	144	cluster of actin-based cell projections	GO_CC	CDHR5,ENPEP,ESPNL,HOMER2,SCIN,SHANK2,SLC17A3,SLC34A2,SLC3A1,STRC_x000D_
GO:0016323	0.000856504	3.12974	4.07386	12	213	basolateral plasma membrane	GO_CC	ABCC6,CA2,CLDN7,IL6R,KCNQ4,P2RY6,RAB17,RHBG,SLC16A10,SLCO4C1,TGFA,VSIG1_x000D_
GO:0071944	0.00130372	1.40235	107.852	135	5639	cell periphery	GO_CC	ABCA3,ABCA7,ABCB1,ABCB4,ABCC6,ADCY2,ADORA2A,ADRA1A,ALOX15B,AMBP,ANO7,AQP8,ART1,ASIC2,ATP8A1,ATP8A2,BAIAP3,BTC,CA2,CATSPER1,CD33,CD37,CDHR1,CDHR5,CHRM4,CLDN10,CLDN16,CLDN2,CLDN23,CLDN7,CMKLR1,COBL,CPAMD8,CST6,CTTNBP2,CXCR5,DMBT1,DOK7,ENHO,ENPEP,ENTPD2,EVPL,FCHO1,FGR,FZD3,GAL3ST1,GLDC,GNG7,GNRHR2,GPR160,GPR31,GPR62,GRB7,HOMER2,IHH,IL6R,ILDR1,ITM2A,KCNIP1,KCNMB3,KCNQ4,KCNT1,KIF17,LCE1E,LY6G6C,MAS1L,…
GO:0048786	0.00204531	4.94723	1.3197	6	69	presynaptic active zone	GO_CC	ADORA2A,FZD3,NTNG1,PCLO,PPFIA4,SLC17A7_x000D_
GO:0098871	0.00213398	51.5535	0.0765044	2	4	postsynaptic actin cytoskeleton	GO_CC	CTTNBP2,PPP1R9A_x000D_
GO:0005923	0.00241336	3.65542	2.33338	8	122	bicellular tight junction	GO_CC	CLDN10,CLDN16,CLDN2,CLDN23,CLDN7,FRMD4B,OCLN,PARD6A_x000D_
GO:0031526	0.00260595	5.76161	0.956305	5	50	brush border membrane	GO_CC	CDHR5,SHANK2,SLC17A3,SLC34A2,SLC3A1_x000D_
GO:0044459	0.00270908	1.47581	53.1798	73	2798	plasma membrane part	GO_CC	ABCA7,ABCB1,ABCB4,ABCC6,ADCY2,ADORA2A,ADRA1A,AQP8,ASIC2,CA2,CATSPER1,CD33,CD37,CDHR1,CDHR5,CHRM4,CLDN7,CMKLR1,CXCR5,DMBT1,ENPEP,FCHO1,FGR,FZD3,GAL3ST1,GNG7,GNRHR2,GPR31,HOMER2,IL6R,KCNIP1,KCNMB3,KCNQ4,KIF17,LY6G6C,MREG,MUC4,NCMAP,NOTCH4,NPY1R,NRCAM,NTNG1,OCLN,P2RX6,P2RY6,PACSIN1,PARD6A,PCDHA11,PCDHGB2,PDE6B,PRKCQ,PRLHR,PRSS27,PTGER1,PTPRN2,RAB17,RAB26,RDH12,RHBG,S100P,SCNN1A,SEMA4A,SGCZ,SHANK2,SK…
GO:0032426	0.00386687	11.0699	0.325144	3	17	stereocilium tip	GO_CC	ESPNL,HOMER2,STRC_x000D_
GO:0005887	0.00411601	1.57704	30.8313	46	1612	integral component of plasma membrane	GO_CC	ABCB4,ADCY2,ADORA2A,ADRA1A,AQP8,ASIC2,CD33,CD37,CDHR1,CDHR5,CHRM4,CMKLR1,CXCR5,ENPEP,GAL3ST1,GNRHR2,GPR31,IL6R,KCNIP1,KCNMB3,KCNQ4,MUC4,NCMAP,NOTCH4,NPY1R,NRCAM,P2RX6,P2RY6,PCDHA11,PCDHGB2,PRLHR,PTGER1,PTPRN2,RHBG,SCNN1A,SEMA4A,SHANK2,SLC16A10,SLC17A3,SLC34A2,SLC3A1,SLCO4C1,SYNDIG1,TMC4,TNFRSF4,TSPAN7_x000D_
GO:0005856	0.00454978	1.49638	41.1785	58	2153	cytoskeleton	GO_CC	ABCB4,ADORA2A,ALOX15B,ARHGAP39,C4orf47,CCDC103,CCDC151,CCDC65,CDKL2,CEP128,CEP72,COBL,CTAG2,CTTNBP2,DNAH2,DOCK2,ESPNL,EVPL,FAAH,FBXL13,FCHO1,FGR,FRMD3,FRMD4B,HOOK1,HOXC8,IQCA1,IQCD,KIF17,KLHL14,KRTAP10-4,KRTAP8-1,MACROD2,MPZL2,MT3,MYL3,MYLK3,MYO5C,ODF3L2,PACSIN1,PARD6A,PCLO,PIFO,PKP1,PPP1R9A,PRKCQ,PRPH,RHBG,RINL,RRAGD,RSPH1,RSPH9,SCIN,SGCZ,SH2B2,SHANK2,SKAP1,SLAIN1_x000D_
GO:0001726	0.00494288	2.96839	3.19406	9	167	ruffle	GO_CC	ABCA7,COBL,FGR,FRMD4B,PACSIN1,PARD6A,RINL,SH2B2,SKAP1_x000D_
GO:0042584	0.005201	25.7741	0.114757	2	6	chromaffin granule membrane	GO_CC	ATP8A1,SYT2_x000D_
GO:0120038	0.0066915	1.61686	23.3753	36	1244	plasma membrane bounded cell projection part	GO_CC	ABCA7,ADCY2,ADORA2A,ASIC2,ATCAY,ATP8A2,CCDC103,CCDC151,CCDC65,CDHR1,CDHR5,CEP128,CHRM4,COBL,CTTNBP2,DNAH2,ESPNL,FGR,FZD3,HOMER2,KCNIP1,KIF17,MT3,N4BP3,NCMAP,NGEF,NPFF,NRCAM,P2RX6,PACSIN1,PDE6B,PIFO,PPP1R9A,PRKAA2,PTPRN2,RAB17,RSPH1,RSPH9,S100P,SCNN1A,SHANK2,SLC17A3,SLC34A2,SLC3A1,STRC,SYNDIG1_x000D_
GO:0001533	0.00805438	4.31783	1.2432	5	65	cornified envelope	GO_CC	CST6,EVPL,LCE1E,PKP1,SPRR2F_x000D_
GO:0016235	0.00831343	5.44567	0.803296	4	42	aggresome	GO_CC	FGR,KLF8,KLHL14,PRKCQ_x000D_
GO:0016021	0.00884806	1.37064	67.8395	86	3710	integral component of membrane	GO_CC	ABCA3,ABCA7,ABCB1,ABCB4,ABCC6,ABO,ADCY2,ADORA2A,ADRA1A,ANO7,AQP8,ASIC2,ATP8A1,ATP8A2,B3GAT1,BTC,CATSPER1,CD33,CD37,CDHR1,CDHR5,CHRM4,CHST9,CLDN10,CLDN16,CLDN2,CLDN23,CLDN7,CLEC4F,CLMN,CMKLR1,CXCR5,DGAT2L6,DPY19L2,ELOVL7,ENPEP,ENPP5,ENTPD2,EPHX4,EVA1C,FAAH,FER1L4,FRMD3,FZD3,GAL3ST1,GAL3ST3,GCNT2,GCNT3,GDPD3,GNRHR2,GOLT1A,GPR160,GPR31,GPR62,HRCT1,HS6ST2,IGSF1,IL6R,ILDR1,ITM2A,KCNIP1,KCNMB3,KCNQ4,KC…
GO:0030672	0.0136299	3.24105	1.95086	6	102	synaptic vesicle membrane	GO_CC	MCTP1,PTPRN2,RAB26,SLC17A7,SYT12,SYT2_x000D_
GO:0097447	0.013835	1.78306	11.6478	20	609	dendritic tree	GO_CC	ADCY2,ADORA2A,ASIC2,ATCAY,CHRM4,COBL,CTTNBP2,FZD3,HOMER2,KCNIP1,KIF17,MT3,N4BP3,NPFF,P2RX6,PPP1R9A,PRKAA2,RAB17,SHANK2,SYNDIG1_x000D_
GO:0005930	0.0223671	2.87913	2.18038	6	114	axoneme	GO_CC	CCDC103,CCDC151,CCDC65,DNAH2,KIF17,RSPH9_x000D_
GO:0001772	0.0268075	4.9949	0.650287	3	34	immunological synapse	GO_CC	CD37,PRKCQ,SKAP1_x000D_
GO:0043218	0.0285243	8.58779	0.267765	2	14	compact myelin	GO_CC	NCMAP,PLLP_x000D_
GO:0044425	0.0322626	1.28519	70.8326	85	3973	membrane part	GO_CC	ABCA3,ABCA7,ABCB1,ABCB4,ABCC6,ABO,ADCY2,ADORA2A,ADRA1A,ALOX15B,ANO7,AP1S3,AQP8,ART1,ASIC2,ATP8A1,ATP8A2,B3GAT1,BTC,CA2,CATSPER1,CD33,CD37,CDHR1,CDHR5,CHRM4,CHST9,CLDN10,CLDN16,CLDN2,CLDN23,CLDN7,CLEC4F,CLMN,CMKLR1,COX6A2,CXCR5,CYP2A13,CYP2J2,DGAT2L6,DMBT1,DPY19L2,ELOVL7,ENPEP,ENPP5,ENTPD2,EPHX4,EVA1C,FAAH,FCHO1,FER1L4,FGR,FRMD3,FZD3,GAL3ST1,GAL3ST3,GCNT2,GCNT3,GDPD3,GNG7,GNRHR2,GOLT1A,GPR160,GPR3…
GO:0070382	0.0361766	2.19623	3.76784	8	197	exocytic vesicle	GO_CC	CTTNBP2,MCTP1,MT3,PTPRN2,RAB26,SLC17A7,SYT12,SYT2_x000D_
GO:0098858	0.0371003	2.18455	3.78697	8	198	actin-based cell projection	GO_CC	CA2,CDHR5,ESPNL,FZD3,HOMER2,PPP1R9A,S100P,STRC_x000D_
GO:0030424	0.0376782	1.63294	11.3609	18	594	axon	GO_CC	ADORA2A,ATCAY,CA2,COBL,FZD3,MT3,N4BP3,NCMAP,NGEF,NPFF,NRCAM,PACSIN1,PPP1R9A,PRKAA2,PTPRN2,SHANK2,SLC17A7,SYT2_x000D_
GO:0000795	0.0381983	4.30004	0.745918	3	39	synaptonemal complex	GO_CC	BLM,STAG3,SYCE3_x000D_
GO:0043197	0.0386197	2.31098	3.13668	7	164	dendritic spine	GO_CC	ASIC2,CTTNBP2,MT3,P2RX6,PPP1R9A,SHANK2,SYNDIG1_x000D_
GO:0042599	0.0410609	6.86916	0.325144	2	17	lamellar body	GO_CC	ABCA3,KLK7_x000D_
GO:0030054	0.0444456	1.40721	24.2328	33	1267	cell junction	GO_CC	ABCA7,ABCB4,ANO7,ATCAY,CHRM4,CLDN10,CLDN16,CLDN2,CLDN23,CLDN7,DOK7,EVPL,FRMD4B,GRB7,HOMER2,ILDR1,IRF6,MCTP1,OCLN,P2RX6,PACSIN1,PARD6A,PCLO,PKP1,PPP1R9A,PTPRN2,SCIN,SHANK2,SKAP1,SLC17A7,SYNDIG1,SYT12,SYT2_x000D_
GO:0044431	0.0462232	1.46433	18.3037	26	957	Golgi apparatus part	GO_CC	ABCA7,ABO,ACAN,AP1S3,ATP8A1,B3GAT1,BAIAP3,CHST9,GAL3ST1,GAL3ST3,GCNT2,GCNT3,GOLT1A,HS3ST1,HS6ST2,MGAT3,MGAT4A,MUC4,MUCL1,NOTCH4,PIFO,RAB26,SLC24A5,STEAP2,TGFA,ZDHHC15_x000D_
GO:0090554	3.21617e-05	146.813	0.0807623	3	4	phosphatidylcholine-translocating ATPase activity	GO_MF	ABCA7,ABCB1,ABCB4_x000D_
GO:0005509	3.48761e-05	2.37889	14.0728	31	697	calcium ion binding	GO_MF	ALOX15B,ANKEF1,BAIAP3,CAPN12,CDHR1,CDHR5,CRNN,EFCAB12,EFHB,FLJ44635,HABP2,HIST1H1E,IHH,KCNIP1,MCTP1,MYL3,NELL2,NOTCH4,PCDHA11,PCDHGB2,PCLO,PITPNM3,PLCH1,RASEF,REPS2,S100A1,S100P,SCIN,SYT12,SYT2,VSNL1_x000D_
GO:0005436	0.000626321	24.4618	0.181715	3	9	sodium:phosphate symporter activity	GO_MF	SLC17A3,SLC17A7,SLC34A2_x000D_
GO:0008109	0.00120328	97.5989	0.0605717	2	3	N-acetyllactosaminide beta-1,6-N-acetylglucosaminyltransferase activity	GO_MF	GCNT2,GCNT3_x000D_
GO:0001733	0.00237441	48.7966	0.0807623	2	4	galactosylceramide sulfotransferase activity	GO_MF	GAL3ST1,GAL3ST3_x000D_
GO:0030160	0.00237441	48.7966	0.0807623	2	4	GKAP/Homer scaffold activity	GO_MF	HOMER2,SHANK2_x000D_
GO:0008559	0.00577881	24.3955	0.121143	2	6	xenobiotic transmembrane transporting ATPase activity	GO_MF	ABCB1,ABCB4_x000D_
GO:0004321	0.00798275	19.5153	0.141334	2	7	fatty-acyl-CoA synthase activity	GO_MF	ACSM3,ACSM5_x000D_
GO:0015321	0.00798275	19.5153	0.141334	2	7	sodium-dependent phosphate transmembrane transporter activity	GO_MF	SLC17A7,SLC34A2_x000D_
GO:0016638	0.00828736	8.14825	0.424002	3	21	oxidoreductase activity, acting on the CH-NH2 group of donors	GO_MF	CRYM,GLDC,MAOB_x000D_
GO:0005319	0.00968223	2.85491	2.94782	8	146	lipid transporter activity	GO_MF	ABCA3,ABCA7,ABCB1,ABCB4,ANO7,ATP8A1,ATP8A2,PITPNM3_x000D_
GO:0003996	0.0105024	16.2618	0.161525	2	8	acyl-CoA ligase activity	GO_MF	ACSM3,ACSM5_x000D_
GO:0047760	0.0105024	16.2618	0.161525	2	8	butyrate-CoA ligase activity	GO_MF	ACSM3,ACSM5_x000D_
GO:0022804	0.011513	2.07644	7.02632	14	348	active transmembrane transporter activity	GO_MF	ABCA3,ABCA7,ABCB1,ABCB4,ABCC6,ATP8A1,SLC13A5,SLC16A10,SLC17A3,SLC17A7,SLC24A5,SLC34A2,SLC47A1,SLCO4C1_x000D_
GO:0015280	0.0133241	13.9379	0.181715	2	9	ligand-gated sodium channel activity	GO_MF	ASIC2,SCNN1A_x000D_
GO:0035586	0.0135059	6.66521	0.504764	3	25	purinergic receptor activity	GO_MF	ADORA2A,P2RX6,P2RY6_x000D_
GO:0004983	0.0164348	12.1949	0.201906	2	10	neuropeptide Y receptor activity	GO_MF	NPY1R,PRLHR_x000D_
GO:0019911	0.0164348	12.1949	0.201906	2	10	structural constituent of myelin sheath	GO_MF	NCMAP,PLLP_x000D_
GO:0035256	0.0164348	12.1949	0.201906	2	10	G protein-coupled glutamate receptor binding	GO_MF	ADORA2A,HOMER2_x000D_
GO:0005070	0.0234171	3.915	1.09029	4	54	SH3/SH2 adaptor activity	GO_MF	GRAP2,GRB7,SH2B2,SKAP1_x000D_
GO:0050699	0.0241593	5.23513	0.625907	3	31	WW domain binding	GO_MF	ATCAY,CDC25C,SCNN1A_x000D_
GO:0008194	0.0288804	2.47282	2.94782	7	146	UDP-glycosyltransferase activity	GO_MF	ABO,B3GAT1,GCNT2,GCNT3,MGAT3,MGAT4A,UGT8_x000D_
GO:0008146	0.0325478	4.61518	0.701391	3	35	sulfotransferase activity	GO_MF	CHST9,GAL3ST1,GAL3ST3,HS3ST1,HS6ST2,SULT1C2_x000D_
GO:0015081	0.0327668	2.40309	3.02858	7	150	sodium ion transmembrane transporter activity	GO_MF	ASIC2,SCNN1A,SLC13A5,SLC17A3,SLC17A7,SLC24A5,SLC34A2_x000D_
GO:0008378	0.0356625	4.44064	0.72686	3	36	galactosyltransferase activity	GO_MF	ABO,B3GAT1,UGT8_x000D_
GO:0004089	0.0358897	7.50239	0.302858	2	15	carbonate dehydratase activity	GO_MF	CA13,CA2_x000D_
GO:0016594	0.0358897	7.50239	0.302858	2	15	glycine binding	GO_MF	ALAS2,GLDC_x000D_
GO:0019215	0.0358897	7.50239	0.302858	2	15	intermediate filament binding	GO_MF	EVPL,PKP1_x000D_
GO:0034483	0.0358897	7.50239	0.302858	2	15	heparan sulfate sulfotransferase activity	GO_MF	HS3ST1,HS6ST2_x000D_
GO:0005179	0.036146	2.55816	2.44306	6	121	hormone activity	GO_MF	CGB1,ENHO,NPFF,PYY2,RLN2,SST_x000D_
GO:0015405	0.0399834	2.49269	2.50363	6	124	P-P-bond-hydrolysis-driven transmembrane transporter activity	GO_MF	ABCA3,ABCA7,ABCB1,ABCB4,ABCC6,ATP8A1_x000D_
GO:0004697	0.0404798	6.9661	0.323049	2	16	protein kinase C activity	GO_MF	PKN3,PRKCQ_x000D_
GO:0008391	0.0404798	6.9661	0.323049	2	16	arachidonic acid monooxygenase activity	GO_MF	CYP2A13,CYP2J2_x000D_
GO:0071837	0.0404798	6.9661	0.323049	2	16	HMG box domain binding	GO_MF	ALX4,HOXC4_x000D_
GO:0001205	0.0409227	4.1864	0.767241	3	38	distal enhancer DNA-binding transcription activator activity, RNA polymerase II-specific	GO_MF	CDX1,HOXC4,POU4F1_x000D_
GO:0016409	0.0409227	4.1864	0.767241	3	38	palmitoyltransferase activity	GO_MF	SPTLC3,ZDHHC15,ZDHHC23_x000D_
GO:0046934	0.048566	3.05611	1.37296	4	68	phosphatidylinositol-4,5-bisphosphate 3-kinase activity	GO_MF	BTC,FGF22,FGF4,PIK3AP1_x000D_
GO:0004012	0.0495414	6.14601	0.36047	2	18	phospholipid-translocating ATPase activity	GO_MF	ABCA7,ABCB1,ABCB4,ATP8A1,ATP8A2_x000D_

## Sheet: D_GO_2280_HSC
GOID	Pvalue	OddsRatio	ExpCount	Count	Size	Term	GO_type	genes_x000D_
GO:0042407	5.2041e-13	17.5809	1.96399	17	32	cristae formation	GO_BP	ATP5F1A,ATP5F1B,ATP5F1C,ATP5F1D,ATP5F1E,ATP5MC1,ATP5MC2,ATP5MC3,ATP5ME,ATP5MF,ATP5MG,ATP5PB,ATP5PD,ATP5PF,ATP5PO,DMAC2L,UQCC3_x000D_
GO:0042776	1.25416e-11	37.0857	1.04337	12	17	mitochondrial ATP synthesis coupled proton transport	GO_BP	ATP5F1A,ATP5F1B,ATP5F1C,ATP5F1D,ATP5F1E,ATP5ME,ATP5MF,ATP5MG,ATP5PB,ATP5PD,ATP5PF,ATP5PO_x000D_
GO:0046483	1.07525e-09	1.45767	394.148	489	6422	heterocycle metabolic process	GO_BP	ABCA2,ABCG1,ABRAXAS1,ACVRL1,AFG1L,AK6,AK9,AR,ATP23,ATP5F1A,ATP5F1B,ATP5F1C,ATP5F1D,ATP5F1E,ATP5IF1,ATP5MC1,ATP5MC2,ATP5MC3,ATP5ME,ATP5MF,ATP5MG,ATP5PB,ATP5PD,ATP5PF,ATP5PO,BABAM2,BACH2,BARX1,BCHE,BMP5,BMP6,BMPER,BMT2,BOLA2B,BRCA2,BRIP1,BRWD3,BUD23,C3orf33,CAMK4,CAPN15,CARMIL1,CARNMT1,CAVIN1,CBX2,CCAR2,CCNE2,CCNQ,CD4,CDKAL1,CENPS,CENPX,CIPC,CLSPN,CMTR1,CMTR2,CNOT9,COX7A1,CRAMP1,CSGALNACT1,CYREN,CY…
GO:0006725	1.511e-09	1.45212	396.909	491	6467	cellular aromatic compound metabolic process	GO_BP	ABCA2,ABCG1,ABRAXAS1,ACVRL1,AFG1L,AK6,AK9,AR,ATP23,ATP5F1A,ATP5F1B,ATP5F1C,ATP5F1D,ATP5F1E,ATP5IF1,ATP5MC1,ATP5MC2,ATP5MC3,ATP5ME,ATP5MF,ATP5MG,ATP5PB,ATP5PD,ATP5PF,ATP5PO,BABAM2,BACH2,BARX1,BCHE,BMP5,BMP6,BMPER,BMT2,BOLA2B,BRCA2,BRIP1,BRWD3,BUD23,C3orf33,CAMK4,CAPN15,CARMIL1,CARNMT1,CAVIN1,CBX2,CCAR2,CCNE2,CCNQ,CD4,CDKAL1,CENPS,CENPX,CIPC,CLSPN,CMTR1,CMTR2,CNOT9,COX7A1,CRAMP1,CSGALNACT1,CYREN,CY…
GO:1901360	5.32822e-09	1.4311	409.737	501	6676	organic cyclic compound metabolic process	GO_BP	ABCA2,ABCG1,ABRAXAS1,ACVRL1,AFG1L,AGTR1,AK6,AK9,AR,ATP23,ATP5F1A,ATP5F1B,ATP5F1C,ATP5F1D,ATP5F1E,ATP5IF1,ATP5MC1,ATP5MC2,ATP5MC3,ATP5ME,ATP5MF,ATP5MG,ATP5PB,ATP5PD,ATP5PF,ATP5PO,BABAM2,BACH2,BARX1,BCHE,BMP5,BMP6,BMPER,BMT2,BOLA2B,BRCA2,BRIP1,BRWD3,BUD23,C3orf33,CACNA1H,CAMK4,CAPN15,CARMIL1,CARNMT1,CAVIN1,CBX2,CCAR2,CCNE2,CCNQ,CD4,CDKAL1,CENPS,CENPX,CES1,CIPC,CLSPN,CMTR1,CMTR2,CNOT9,COX7A1,CRAMP1,…
GO:0034654	7.82708e-08	1.44263	255.993	330	4171	nucleobase-containing compound biosynthetic process	GO_BP	ABCA2,ABCG1,ACVRL1,AK6,AK9,AR,ATP5F1A,ATP5F1B,ATP5F1C,ATP5F1D,ATP5F1E,ATP5MC1,ATP5MC2,ATP5MC3,ATP5ME,ATP5MF,ATP5MG,ATP5PB,ATP5PD,ATP5PF,ATP5PO,BACH2,BARX1,BMP5,BMP6,BMPER,BOLA2B,BRCA2,BRIP1,BRWD3,C3orf33,CAMK4,CAPN15,CAVIN1,CBX2,CCAR2,CCNQ,CD4,CIPC,CNOT9,CRAMP1,CYTL1,DCAF1,DHFR2,DMAC2L,E2F1,EBF4,EDRF1,ELK4,ELOA,ELOB,ELOC,ELP1,EMSY,ENTPD5,ERBIN,EREG,FAAP20,FAM83G,FGF10,FGF7,FGFR2,FOXF1,FOXF2,GAL,G…
GO:0034641	1.02891e-07	1.38282	429.499	513	6998	cellular nitrogen compound metabolic process	GO_BP	ABCA2,ABCG1,ABRAXAS1,ACVRL1,AFG1L,AK6,AK9,AR,ATP23,ATP5F1A,ATP5F1B,ATP5F1C,ATP5F1D,ATP5F1E,ATP5IF1,ATP5MC1,ATP5MC2,ATP5MC3,ATP5ME,ATP5MF,ATP5MG,ATP5PB,ATP5PD,ATP5PF,ATP5PO,AZIN2,B3GALT2,BABAM2,BACH2,BARX1,BMP5,BMP6,BMPER,BMT2,BOLA2B,BRCA2,BRIP1,BRWD3,BUD23,C3orf33,C8orf88,CAMK4,CAPN15,CARMIL1,CARNMT1,CAVIN1,CBX2,CCAR2,CCNE2,CCNQ,CD4,CDKAL1,CENPS,CENPX,CIPC,CLSPN,CMTR1,CMTR2,CNOT9,CORIN,COX7A1,CPZ…
GO:0009206	7.08767e-07	3.61889	7.79457	24	127	purine ribonucleoside triphosphate biosynthetic process	GO_BP	AK9,ATP5F1A,ATP5F1B,ATP5F1C,ATP5F1D,ATP5F1E,ATP5MC1,ATP5MC2,ATP5MC3,ATP5ME,ATP5MF,ATP5MG,ATP5PB,ATP5PD,ATP5PF,ATP5PO,DMAC2L,ENTPD5,GCK,IGF1,INSR,NIPSNAP2,TIGAR,UQCC3_x000D_
GO:0007006	1.27091e-06	3.48279	8.04007	24	131	mitochondrial membrane organization	GO_BP	ATP5F1A,ATP5F1B,ATP5F1C,ATP5F1D,ATP5F1E,ATP5IF1,ATP5MC1,ATP5MC2,ATP5MC3,ATP5ME,ATP5MF,ATP5MG,ATP5PB,ATP5PD,ATP5PF,ATP5PO,DMAC2L,E2F1,MAIP1,RCC1L,RTL10,STPG1,TIMM29,UQCC3_x000D_
GO:0000353	1.94155e-06	21.5374	0.736495	7	12	formation of quadruple SL/U4/U5/U6 snRNP	GO_BP	RNU4-1,RNU4-2,RNU5A-1,RNU5B-1,RNU5D-1,RNU5E-1,RNU5F-1_x000D_
GO:0000365	1.94155e-06	21.5374	0.736495	7	12	mRNA trans splicing, via spliceosome	GO_BP	RNU4-1,RNU4-2,RNU5A-1,RNU5B-1,RNU5D-1,RNU5E-1,RNU5F-1_x000D_
GO:0009168	4.87935e-06	3.18327	8.65381	24	141	purine ribonucleoside monophosphate biosynthetic process	GO_BP	AK9,ATP5F1A,ATP5F1B,ATP5F1C,ATP5F1D,ATP5F1E,ATP5MC1,ATP5MC2,ATP5MC3,ATP5ME,ATP5MF,ATP5MG,ATP5PB,ATP5PD,ATP5PF,ATP5PO,DMAC2L,ENTPD5,GCK,IGF1,INSR,NIPSNAP2,TIGAR,UQCC3_x000D_
GO:0009142	8.01693e-06	3.07733	8.89931	24	145	nucleoside triphosphate biosynthetic process	GO_BP	AK9,ATP5F1A,ATP5F1B,ATP5F1C,ATP5F1D,ATP5F1E,ATP5MC1,ATP5MC2,ATP5MC3,ATP5ME,ATP5MF,ATP5MG,ATP5PB,ATP5PD,ATP5PF,ATP5PO,DMAC2L,ENTPD5,GCK,IGF1,INSR,NIPSNAP2,TIGAR,UQCC3_x000D_
GO:1904262	2.25469e-05	11.9625	0.981993	7	16	negative regulation of TORC1 signaling	GO_BP	BMT2,CASTOR1,CASTOR2,CASTOR3,DEPDC5,RNF152,SESN3_x000D_
GO:0097659	2.46764e-05	1.34943	223.526	278	3642	nucleic acid-templated transcription	GO_BP	ABCA2,ABCG1,ACVRL1,AR,BACH2,BARX1,BMP5,BMP6,BMPER,BOLA2B,BRCA2,BRIP1,BRWD3,C3orf33,CAMK4,CAPN15,CAVIN1,CBX2,CCAR2,CCNQ,CD4,CIPC,CNOT9,CRAMP1,CYTL1,DCAF1,E2F1,EBF4,EDRF1,ELK4,ELOA,ELOB,ELOC,ELP1,EMSY,ERBIN,EREG,FAM83G,FGF10,FGF7,FGFR2,FOXF1,FOXF2,GAL,GATA4,GCN1,GDF6,GLI4,GLMP,GPC3,GTF2A1,GTF2H2C,HCLS1,HDX,HGF,HHEX,HIPK3,HOXA3,ICE1,ICE2,IGF1,IL18R1,IL33,INSR,INTS11,INTS13,INTS14,IRAK3,ISL2,ITGA8,JA…
GO:0044238	3.10189e-05	1.29354	681.994	746	11112	primary metabolic process	GO_BP	A2M,ABCA2,ABCG1,ABRAXAS1,ABRAXAS2,ACKR3,ACVRL1,ADAMTS10,ADAMTS15,ADAMTS4,ADAMTS8,AFG1L,AGTR1,AK6,AK9,ALG10,ALPK1,AMY2B,ANO8,ANOS1,ANXA8L1,APOD,AR,AREG,ARMT1,ART4,ATP23,ATP5F1A,ATP5F1B,ATP5F1C,ATP5F1D,ATP5F1E,ATP5IF1,ATP5MC1,ATP5MC2,ATP5MC3,ATP5ME,ATP5MF,ATP5MG,ATP5PB,ATP5PD,ATP5PF,ATP5PO,AZIN2,B3GALT2,B3GLCT,B3GNT10,B4GAT1,BABAM2,BACH2,BARX1,BDKRB1,BDKRB2,BEX3,BMP5,BMP6,BMPER,BMT2,BOLA2B,BRCA2,BR…
GO:0016070	3.40191e-05	1.35181	218.725	271	3668	RNA metabolic process	GO_BP	ABCA2,ABCG1,ACVRL1,AR,BACH2,BARX1,BMP5,BMP6,BMPER,BMT2,BOLA2B,BRCA2,BRIP1,BRWD3,BUD23,C3orf33,CAMK4,CAPN15,CAVIN1,CBX2,CCAR2,CCNQ,CD4,CDKAL1,CIPC,CMTR1,CMTR2,CNOT9,CRAMP1,CYTL1,DCAF1,DNA2,DUS2,DXO,E2F1,EBF4,EDRF1,ELK4,ELOA,ELOB,ELOC,ELP1,EMSY,ERBIN,EREG,ESS2,EXO1,FAM83G,FGF10,FGF7,FGFR2,FOXF1,FOXF2,GAL,GATA4,GATB,GCN1,GDF6,GLI4,GLMP,GPC3,GTF2A1,GTF2H2C,HCLS1,HDX,HELB,HGF,HHEX,HIPK3,HOXA3,ICE1,ICE…
GO:0000395	3.91332e-05	6.92904	1.77986	9	29	mRNA 5'-splice site recognition	GO_BP	RNU1-1,RNU1-2,RNU1-4,RNVU1-15,RNVU1-18,RNVU1-19,RNVU1-6,RNVU1-7,SRSF10_x000D_
GO:0046839	5.52618e-05	5.70568	2.27086	10	37	phospholipid dephosphorylation	GO_BP	PIP4P1,PIP4P2,PLPP1,PLPP2,PLPP3,PLPP4,PLPP5,PLPP6,PLPPR2,PLPPR3_x000D_
GO:0009124	8.62956e-05	2.60057	10.2496	24	167	nucleoside monophosphate biosynthetic process	GO_BP	AK9,ATP5F1A,ATP5F1B,ATP5F1C,ATP5F1D,ATP5F1E,ATP5MC1,ATP5MC2,ATP5MC3,ATP5ME,ATP5MF,ATP5MG,ATP5PB,ATP5PD,ATP5PF,ATP5PO,DMAC2L,ENTPD5,GCK,IGF1,INSR,NIPSNAP2,TIGAR,UQCC3_x000D_
GO:1901576	0.000112794	1.26773	374.324	432	6099	organic substance biosynthetic process	GO_BP	ABCA2,ABCG1,ACVRL1,AK6,AK9,ALG10,AR,ATP5F1A,ATP5F1B,ATP5F1C,ATP5F1D,ATP5F1E,ATP5IF1,ATP5MC1,ATP5MC2,ATP5MC3,ATP5ME,ATP5MF,ATP5MG,ATP5PB,ATP5PD,ATP5PF,ATP5PO,AZIN2,B3GALT2,B3GLCT,B3GNT10,B4GAT1,BACH2,BARX1,BMP5,BMP6,BMPER,BOLA2B,BRCA2,BRIP1,BRWD3,C3orf33,C8orf88,CACNA1H,CAMK4,CAPN15,CAVIN1,CBSL,CBX2,CCAR2,CCDC3,CCNE2,CCNQ,CD4,CDKAL1,CEMIP,CENPS,CENPX,CES1,CIPC,CLSPN,CNOT9,COQ8A,COQ8B,CRAMP1,CSGALN…
GO:0000244	0.000113424	6.83821	1.59574	8	26	spliceosomal tri-snRNP complex assembly	GO_BP	RNU4-1,RNU4-2,RNU5A-1,RNU5B-1,RNU5D-1,RNU5E-1,RNU5F-1,SRSF10_x000D_
GO:0019219	0.000149494	1.31201	219.075	267	3601	regulation of nucleobase-containing compound metabolic process	GO_BP	ABCA2,ABCG1,ABRAXAS1,ACVRL1,AR,ATP5IF1,BABAM2,BACH2,BARX1,BMP5,BMP6,BMPER,BOLA2B,BRCA2,BRIP1,BRWD3,BUD23,C3orf33,CAMK4,CAPN15,CBX2,CCAR2,CCNQ,CD4,CIPC,CNOT9,COX7A1,CRAMP1,CYREN,CYTL1,DCAF1,DNA2,DXO,E2F1,EBF4,EDRF1,ELK4,ELOA,ELOB,ELOC,ELP1,EMSY,ENTPD5,ERBIN,EREG,ESCO2,EYA4,FAM83G,FANCB,FBH1,FGF10,FGF7,FGFR2,FOXF1,FOXF2,GAL,GATA4,GCK,GCN1,GDF6,GLI4,GLMP,GPC3,GTF2A1,GTF2H2C,HCLS1,HDX,HELB,HGF,HHEX,H…
GO:2001141	0.000151616	1.31223	215.241	263	3507	regulation of RNA biosynthetic process	GO_BP	ABCA2,ABCG1,ACVRL1,AR,BACH2,BARX1,BMP5,BMP6,BMPER,BOLA2B,BRCA2,BRIP1,BRWD3,C3orf33,CAMK4,CAPN15,CBX2,CCAR2,CCNQ,CD4,CIPC,CNOT9,CRAMP1,CYTL1,DCAF1,E2F1,EBF4,EDRF1,ELK4,ELOA,ELOB,ELOC,ELP1,EMSY,ERBIN,EREG,FAM83G,FGF10,FGF7,FGFR2,FOXF1,FOXF2,GAL,GATA4,GCN1,GDF6,GLI4,GLMP,GPC3,GTF2A1,GTF2H2C,HCLS1,HDX,HGF,HHEX,HOXA3,ICE1,ICE2,IGF1,IL18R1,IL33,INSR,IRAK3,ISL2,ITGA8,JADE1,KDM6B,KDM7A,KMT5A,KRBOX1,L3MBT…
GO:1903577	0.000230615	Inf	0.184124	3	3	cellular response to L-arginine	GO_BP	CASTOR1,CASTOR2,CASTOR3_x000D_
GO:2000721	0.000230615	Inf	0.184124	3	3	positive regulation of transcription from RNA polymerase II promoter involved in smooth muscle cell differentiation	GO_BP	ITGA8,MYOCD,NPNT_x000D_
GO:0099132	0.000242552	3.85352	3.68247	12	60	ATP hydrolysis coupled cation transmembrane transport	GO_BP	ATP5F1A,ATP5F1B,ATP5F1C,ATP5F1D,ATP5F1E,ATP5MC1,ATP5MC2,ATP5MC3,ATP5MG,ATP5PB,ATP5PD,ATP5PO_x000D_
GO:0046390	0.000286204	2.10967	15.896	31	259	ribose phosphate biosynthetic process	GO_BP	AK9,ATP5F1A,ATP5F1B,ATP5F1C,ATP5F1D,ATP5F1E,ATP5MC1,ATP5MC2,ATP5MC3,ATP5ME,ATP5MF,ATP5MG,ATP5PB,ATP5PD,ATP5PF,ATP5PO,DMAC2L,ENTPD5,GCK,GUCY1A1,GUCY1B1,HACD1,HACD2,HTD2,IGF1,INSR,NIPSNAP2,NPR1,PDK4,TIGAR,UQCC3_x000D_
GO:0072522	0.000294148	2.07805	16.6325	32	271	purine-containing compound biosynthetic process	GO_BP	AK9,ATP5F1A,ATP5F1B,ATP5F1C,ATP5F1D,ATP5F1E,ATP5MC1,ATP5MC2,ATP5MC3,ATP5ME,ATP5MF,ATP5MG,ATP5PB,ATP5PD,ATP5PF,ATP5PO,DMAC2L,ENTPD5,GCK,GUCY1A1,GUCY1B1,HACD1,HACD2,HTD2,IGF1,INSR,MTHFD2L,NIPSNAP2,NPR1,PDK4,TIGAR,UQCC3_x000D_
GO:0009165	0.000328693	1.93033	21.1129	38	344	nucleotide biosynthetic process	GO_BP	AK6,AK9,ATP5F1A,ATP5F1B,ATP5F1C,ATP5F1D,ATP5F1E,ATP5MC1,ATP5MC2,ATP5MC3,ATP5ME,ATP5MF,ATP5MG,ATP5PB,ATP5PD,ATP5PF,ATP5PO,DMAC2L,ENTPD5,GCK,GPAT4,GUCY1A1,GUCY1B1,HACD1,HACD2,HTD2,IGF1,INSR,MTHFD2L,NAPRT,NAXD,NAXE,NIPSNAP2,NPR1,PDK4,PTGIS,TIGAR,UQCC3_x000D_
GO:0009152	0.00035146	2.17482	13.9647	28	228	purine ribonucleotide biosynthetic process	GO_BP	AK9,ATP5F1A,ATP5F1B,ATP5F1C,ATP5F1D,ATP5F1E,ATP5MC1,ATP5MC2,ATP5MC3,ATP5ME,ATP5MF,ATP5MG,ATP5PB,ATP5PD,ATP5PF,ATP5PO,DMAC2L,ENTPD5,GCK,GUCY1A1,GUCY1B1,HACD1,HACD2,HTD2,IGF1,INSR,NIPSNAP2,NPR1,PDK4,TIGAR,UQCC3_x000D_
GO:2000042	0.000362884	8.38087	1.04337	6	17	negative regulation of double-strand break repair via homologous recombination	GO_BP	FANCB,FBH1,HELB,SHLD1,SHLD2,SHLD3_x000D_
GO:0006396	0.000640709	1.40973	88.2566	118	1438	RNA processing	GO_BP	BMT2,BUD23,CCAR2,CDKAL1,CMTR1,CMTR2,DUS2,ELP1,ESS2,INTS11,INTS14,INTS6L,KHDC4,MBNL3,MRM2,MRM3,MTERF4,MTREX,NBDY,NCBP3,NELFE,NOCT,NOP53,PRMT9,PWAR5,QTRT2,RAMAC,RMRP,RNU1-1,RNU1-2,RNU1-4,RNU4-1,RNU4-2,RNU5A-1,RNU5B-1,RNU5D-1,RNU5E-1,RNU5F-1,RNVU1-15,RNVU1-18,RNVU1-19,RNVU1-6,RNVU1-7,RPP25,RRP7BP,RTRAF,SCARNA1,SCARNA12,SCARNA13,SCARNA16,SCARNA2,SCARNA21,SCARNA22,SCARNA5,SCARNA6,SCARNA7,SCARNA9,SF3B6…
GO:0043414	0.000846352	1.91685	18.4124	33	300	macromolecule methylation	GO_BP	ARMT1,BMT2,BUD23,CMTR1,CMTR2,CSKMT,EEF1AKMT1,EEF1AKMT2,EEF1AKMT3,EEF2KMT,ETFBKMT,KMT5A,KMT5B,KMT5C,MOV10L1,MRM2,MRM3,MTERF4,NELFE,NR1H4,NSD2,NSD3,PRDM5,PRDM6,PRMT9,RAB3D,RAMAC,TET1,TRMO,VCPKMT,VIRMA,WT1,ZC3H13_x000D_
GO:0034645	0.000849219	1.23928	297.851	344	4853	cellular macromolecule biosynthetic process	GO_BP	ABCA2,ABCG1,ACVRL1,ALG10,AR,B3GALT2,B3GLCT,B3GNT10,B4GAT1,BACH2,BARX1,BMP5,BMP6,BMPER,BOLA2B,BRCA2,BRIP1,BRWD3,C3orf33,C8orf88,CAMK4,CAPN15,CAVIN1,CBX2,CCAR2,CCNE2,CCNQ,CD4,CDKAL1,CENPS,CENPX,CIPC,CLSPN,CNOT9,CRAMP1,CSGALNACT1,CYTL1,DCAF1,DIO2,DNA2,DPH7,E2F1,EBF4,EDRF1,EEF1A1P5,EFL1,ELK4,ELOA,ELOB,ELOC,ELP1,EMSY,ENTPD5,ERBIN,EREG,ESCO2,EXO1,FAAP20,FAM83G,FBH1,FGF10,FGF7,FGFR2,FOXF1,FOXF2,GAL,GALN…
GO:0060665	0.000880103	45.9991	0.245498	3	4	regulation of branching involved in salivary gland morphogenesis by mesenchymal-epithelial signaling	GO_BP	FGF10,FGF7,HGF_x000D_
GO:0003197	0.00101387	4.07262	2.63911	9	43	endocardial cushion development	GO_BP	ACVRL1,BMP5,ERBB3,FOXF1,GATA4,ROBO2,TBX20,TBX5,TMEM100_x000D_
GO:0000726	0.00140037	2.76676	5.64646	14	92	non-recombinational repair	GO_BP	ABRAXAS1,ATP23,BABAM2,CYREN,MRE11,MRNIP,NSD2,PAXX,RNF168,SHLD1,SHLD2,SHLD3,SLX1A,SLX1B_x000D_
GO:0046034	0.00154155	1.95239	15.3436	28	250	ATP metabolic process	GO_BP	AFG1L,AK9,ATP5F1A,ATP5F1B,ATP5F1C,ATP5F1D,ATP5F1E,ATP5IF1,ATP5MC1,ATP5MC2,ATP5MC3,ATP5ME,ATP5MF,ATP5MG,ATP5PB,ATP5PD,ATP5PF,ATP5PO,COX7A1,DMAC2L,ENTPD5,GCK,IGF1,INSR,NIPSNAP2,TIGAR,UQCC2,UQCC3_x000D_
GO:2001020	0.00191233	2.03867	12.6432	24	206	regulation of response to DNA damage stimulus	GO_BP	ABRAXAS1,ACKR3,ARMT1,BABAM2,CCAR2,CYREN,EYA4,FANCB,FBH1,FGF10,HELB,KMT5A,MRNIP,NSD2,RNF168,SFRP2,SHLD1,SHLD2,SHLD3,SLF1,SLF2,SPIDR,TIGAR,YJU2_x000D_
GO:0009889	0.0019974	1.22782	261.394	302	4259	regulation of biosynthetic process	GO_BP	ABCA2,ABCG1,ACVRL1,AR,BACH2,BARX1,BMP5,BMP6,BMPER,BOLA2B,BRCA2,BRIP1,BRWD3,C3orf33,C8orf88,CAMK4,CAPN15,CBX2,CCAR2,CCDC3,CCNQ,CD4,CIPC,CNOT9,CRAMP1,CYTL1,DCAF1,DIO2,DNA2,DPH7,E2F1,EBF4,EDRF1,ELK4,ELOA,ELOB,ELOC,ELP1,EMSY,ENTPD5,ERBIN,EREG,ESCO2,FABP3,FAM83G,FBH1,FGF10,FGF7,FGFR2,FITM2,FOXF1,FOXF2,GAL,GATA4,GCK,GCN1,GDF6,GLI4,GLMP,GPC3,GTF2A1,GTF2H2C,HCLS1,HDX,HGF,HHEX,HOXA3,HTR2B,ICE1,ICE2,IGF1,I…
GO:0060501	0.00209955	22.9982	0.306873	3	5	positive regulation of epithelial cell proliferation involved in lung morphogenesis	GO_BP	FGF7,FGFR2,WNT2_x000D_
GO:0071557	0.00209955	22.9982	0.306873	3	5	histone H3-K27 demethylation	GO_BP	KDM6B,KDM7A,PHF8_x000D_
GO:0090131	0.00209955	22.9982	0.306873	3	5	mesenchyme migration	GO_BP	ACTC1,ACTG2,FOXF1_x000D_
GO:1900020	0.00209955	22.9982	0.306873	3	5	positive regulation of protein kinase C activity	GO_BP	CEMIP,ROR2,TCIM_x000D_
GO:0032780	0.00213236	6.97788	0.981993	5	16	negative regulation of ATPase activity	GO_BP	ATP5IF1,PAM16,PLN,TNNT2,VCPKMT_x000D_
GO:0031297	0.00279553	4.30252	1.96399	7	32	replication fork processing	GO_BP	BRCA2,CENPS,CENPX,DNA2,FBH1,MRE11,PRIMPOL_x000D_
GO:2000781	0.00284399	6.41009	1.04123	5	17	positive regulation of double-strand break repair	GO_BP	FANCB,MRNIP,SHLD1,SHLD2,SHLD3,SLF1,SLF2,SPIDR_x000D_
GO:0019934	0.00336329	4.1368	2.02536	7	33	cGMP-mediated signaling	GO_BP	CGAS,GUCY1B1,HTR2B,NPR1,PDE3A,PRKAR2B,PRKG1_x000D_
GO:0045738	0.00336329	4.1368	2.02536	7	33	negative regulation of DNA repair	GO_BP	CYREN,FANCB,FBH1,HELB,SHLD1,SHLD2,SHLD3_x000D_
GO:0036297	0.00352308	3.29536	3.1301	9	51	interstrand cross-link repair	GO_BP	CENPS,CENPX,FAAP100,FAAP20,FAAP24,FANCB,RNF168,SLX1A,SLX1B_x000D_
GO:0006357	0.00367959	1.26287	151.172	182	2480	regulation of transcription by RNA polymerase II	GO_BP	ABCA2,ACVRL1,AR,BACH2,BARX1,BMP5,BMP6,BMPER,BOLA2B,BRIP1,BRWD3,CBX2,CCNQ,CRAMP1,CYTL1,DCAF1,E2F1,EBF4,ELK4,ELOA,ELOB,ELOC,ELP1,FAM83G,FGF10,FGFR2,FOXF1,FOXF2,GAL,GATA4,GCN1,GDF6,GLI4,GLMP,GPC3,GTF2H2C,HCLS1,HDX,HGF,HHEX,HOXA3,IGF1,IL33,ISL2,ITGA8,KDM6B,KMT5A,LHX2,MBNL3,MDFI,MED18,MEOX2,MKX,MRTFA,MRTFB,MYDGF,MYOCD,NCOA2,NELFA,NELFE,NKX2-3,NOP53,NPNT,NR1H4,NSD2,OSR2,PCBP3,PCSK6,POU6F1,PRDM5,PRDM6,P…
GO:0042733	0.00375518	3.01647	3.74385	10	61	embryonic digit morphogenesis	GO_BP	C2CD3,CPLANE1,FLVCR1,LNPK,MAP3K20,OSR2,ROR2,SFRP2,TBC1D32,ZBTB16_x000D_
GO:0048557	0.00377481	5.90368	1.10474	5	18	embryonic digestive tract morphogenesis	GO_BP	FGF10,FGFR2,FOXF1,SOX11,TCF21_x000D_
GO:0015986	0.00389777	15.4911	0.364689	3	6	ATP synthesis coupled proton transport	GO_BP	ATP5F1A,ATP5F1B,ATP5F1C,ATP5F1D,ATP5F1E,ATP5MC1,ATP5MC2,ATP5MC3,ATP5ME,ATP5MF,ATP5MG,ATP5PB,ATP5PD,ATP5PF,ATP5PO_x000D_
GO:0045410	0.00400752	15.3313	0.368247	3	6	positive regulation of interleukin-6 biosynthetic process	GO_BP	EREG,TLR1,TLR6_x000D_
GO:0071220	0.00400752	15.3313	0.368247	3	6	cellular response to bacterial lipoprotein	GO_BP	CD14,TLR1,TLR6_x000D_
GO:0071638	0.00400752	15.3313	0.368247	3	6	negative regulation of monocyte chemotactic protein-1 production	GO_BP	APOD,ERBIN,NR1H4_x000D_
GO:0090304	0.00486798	1.57433	29.4232	44	528	nucleic acid metabolic process	GO_BP	ABCA2,ABCG1,ABRAXAS1,ACVRL1,AR,ATP23,BABAM2,BACH2,BARX1,BMP5,BMP6,BMPER,BMT2,BOLA2B,BRCA2,BRIP1,BRWD3,BUD23,C3orf33,CAMK4,CAPN15,CAVIN1,CBX2,CCAR2,CCNE2,CCNQ,CD4,CDKAL1,CENPS,CENPX,CIPC,CLSPN,CMTR1,CMTR2,CNOT9,CRAMP1,CYREN,CYTL1,DCAF1,DNA2,DUS2,DXO,E2F1,EBF4,EDRF1,ELK4,ELOA,ELOB,ELOC,ELP1,EMSY,ERBIN,EREG,ESCO2,ESS2,EXO1,EYA4,FAAP100,FAAP20,FAAP24,FAM83G,FANCB,FBH1,FGF10,FGF7,FGFR2,FOXF1,FOXF2,GAL…
GO:1902600	0.00500611	2.04956	9.94268	19	162	proton transmembrane transport	GO_BP	ATP5F1A,ATP5F1B,ATP5F1C,ATP5F1D,ATP5F1E,ATP5MC1,ATP5MC2,ATP5MC3,ATP5ME,ATP5MF,ATP5MG,ATP5PB,ATP5PD,ATP5PF,ATP5PO,COX7A1,DMAC2L,SLC2A12,SLC9A9_x000D_
GO:0000245	0.00506916	2.56545	5.15546	12	84	spliceosomal complex assembly	GO_BP	KHDC4,RNU1-1,RNU1-2,RNU1-4,RNVU1-15,RNVU1-18,RNVU1-19,RNVU1-6,RNVU1-7,SMN2,SRSF10,SRSF9_x000D_
GO:0008213	0.00508371	2.00384	10.6792	20	174	protein alkylation	GO_BP	ARMT1,CSKMT,EEF1AKMT1,EEF1AKMT2,EEF1AKMT3,EEF2KMT,ETFBKMT,KMT5A,KMT5B,KMT5C,NELFE,NR1H4,NSD2,NSD3,PRDM5,PRDM6,PRMT9,RAB3D,TET1,VCPKMT_x000D_
GO:0048736	0.00541843	1.9908	10.7406	20	175	appendage development	GO_BP	C2CD3,CPLANE1,FGF10,FGFR2,FLVCR1,GPC3,LNPK,MAP3K20,MEOX2,OSR2,PRRX1,ROR2,SCX,SFRP2,SOX11,TBC1D32,TBX4,TBX5,ZBTB16,ZNF141_x000D_
GO:0009199	0.00551428	1.74474	17.5531	29	286	ribonucleoside triphosphate metabolic process	GO_BP	AFG1L,AK9,ATP5F1A,ATP5F1B,ATP5F1C,ATP5F1D,ATP5F1E,ATP5IF1,ATP5MC1,ATP5MC2,ATP5MC3,ATP5ME,ATP5MF,ATP5MG,ATP5PB,ATP5PD,ATP5PF,ATP5PO,COX7A1,DMAC2L,EFL1,ENTPD5,GCK,IGF1,INSR,NIPSNAP2,TIGAR,UQCC2,UQCC3_x000D_
GO:0009126	0.00578593	1.73788	17.6145	29	287	purine nucleoside monophosphate metabolic process	GO_BP	AFG1L,AK9,ATP5F1A,ATP5F1B,ATP5F1C,ATP5F1D,ATP5F1E,ATP5IF1,ATP5MC1,ATP5MC2,ATP5MC3,ATP5ME,ATP5MF,ATP5MG,ATP5PB,ATP5PD,ATP5PF,ATP5PO,COX7A1,DMAC2L,ENTPD5,GCK,IGF1,INSR,NIPSNAP2,NUDT4,TIGAR,UQCC2,UQCC3_x000D_
GO:0009144	0.00578593	1.73788	17.6145	29	287	purine nucleoside triphosphate metabolic process	GO_BP	AFG1L,AK9,ATP5F1A,ATP5F1B,ATP5F1C,ATP5F1D,ATP5F1E,ATP5IF1,ATP5MC1,ATP5MC2,ATP5MC3,ATP5ME,ATP5MF,ATP5MG,ATP5PB,ATP5PD,ATP5PF,ATP5PO,COX7A1,DMAC2L,EFL1,ENTPD5,GCK,IGF1,INSR,NIPSNAP2,TIGAR,UQCC2,UQCC3_x000D_
GO:0061448	0.0061526	1.76794	16.1415	27	263	connective tissue development	GO_BP	ACVRL1,BMP5,BMP6,COL21A1,CSGALNACT1,CYTL1,FRZB,GDF6,HOXA3,LNPK,NR1H4,OSR2,PDGFD,PRRX1,PTH1R,RFLNA,RFLNB,ROR2,SCX,SELENOM,SFRP2,SOX5,SPART,WT1,ZBTB16,ZEB1,ZNF516_x000D_
GO:0022613	0.00616755	1.54708	29.7667	44	485	ribonucleoprotein complex biogenesis	GO_BP	BMT2,BUD23,EFL1,KHDC4,LTO1,MRM2,MRM3,MTERF3,MTERF4,MTREX,NBDY,NOCT,NOM1,NOP53,RAMAC,RIOX2,RMRP,RNU1-1,RNU1-2,RNU1-4,RNU4-1,RNU4-2,RNU5A-1,RNU5B-1,RNU5D-1,RNU5E-1,RNU5F-1,RNVU1-15,RNVU1-18,RNVU1-19,RNVU1-6,RNVU1-7,RPLP0P6,RRP7BP,SMN2,SNU13,SRSF10,SRSF9,TENT4B,UTP11,UTP25,UTP4,YAE1,ZNF658_x000D_
GO:0007205	0.00618657	4.18778	1.71849	6	28	protein kinase C-activating G protein-coupled receptor signaling pathway	GO_BP	BDKRB1,DGKE,DGKH,HTR1B,HTR2B,PLPP1_x000D_
GO:0071826	0.00636281	1.72431	17.7373	29	289	ribonucleoprotein complex subunit organization	GO_BP	EFL1,KHDC4,MTERF3,MTERF4,NBDY,NOCT,NOP53,RAMAC,RNU1-1,RNU1-2,RNU1-4,RNU4-1,RNU4-2,RNU5A-1,RNU5B-1,RNU5D-1,RNU5E-1,RNU5F-1,RNVU1-15,RNVU1-18,RNVU1-19,RNVU1-6,RNVU1-7,RPLP0P6,RRP7BP,SMN2,SNU13,SRSF10,SRSF9_x000D_
GO:0001867	0.00645236	6.81757	0.797869	4	13	complement activation, lectin pathway	GO_BP	A2M,COLEC10,COLEC11,MASP1_x000D_
GO:0030497	0.00645236	6.81757	0.797869	4	13	fatty acid elongation	GO_BP	HACD1,HACD2,HACD3,HACD4_x000D_
GO:0042761	0.00645236	6.81757	0.797869	4	13	very long-chain fatty acid biosynthetic process	GO_BP	HACD1,HACD2,HACD3,HACD4_x000D_
GO:0080009	0.00645236	6.81757	0.797869	4	13	mRNA methylation	GO_BP	CMTR1,CMTR2,VIRMA,ZC3H13_x000D_
GO:0043983	0.00669422	11.4978	0.429622	3	7	histone H4-K12 acetylation	GO_BP	JADE1,JADE2,JADE3_x000D_
GO:0086036	0.00669422	11.4978	0.429622	3	7	regulation of cardiac muscle cell membrane potential	GO_BP	FXYD1,PLN,SLC8B1_x000D_
GO:0006839	0.00718899	1.78741	14.7913	25	241	mitochondrial transport	GO_BP	ATP5F1A,ATP5F1B,ATP5F1C,ATP5F1D,ATP5F1E,ATP5IF1,ATP5ME,ATP5MF,ATP5MG,ATP5PB,ATP5PD,ATP5PF,ATP5PO,E2F1,FLVCR1,MAIP1,MCUB,MTERF4,PAM16,RHOU,RTL10,SLC8B1,STPG1,TIMM29,TOMM70_x000D_
GO:0032332	0.00769153	4.79591	1.28887	5	21	positive regulation of chondrocyte differentiation	GO_BP	ACVRL1,BMP6,GDF6,SOX5,ZBTB16_x000D_
GO:0061035	0.00823107	2.65134	4.17347	10	68	regulation of cartilage development	GO_BP	ACVRL1,BMP6,FRZB,GDF6,LNPK,RFLNA,RFLNB,SCX,SOX5,ZBTB16_x000D_
GO:0003214	0.00859998	6.13546	0.859244	4	14	cardiac left ventricle morphogenesis	GO_BP	FOXF1,RYR2,SFRP2,TBX5_x000D_
GO:0035269	0.00859998	6.13546	0.859244	4	14	protein O-linked mannosylation	GO_BP	B4GAT1,LARGE1,POMGNT2,RXYLT1_x000D_
GO:0040019	0.008795	3.35998	2.39361	7	39	positive regulation of embryonic development	GO_BP	AR,IGF1,PLCB1,RACK1,SCX,UTP25,WNT2_x000D_
GO:0002200	0.00911139	2.60625	4.23485	10	69	somatic diversification of immune receptors	GO_BP	DCAF1,EXO1,NSD2,PMS2P1,PMS2P3,PMS2P6,RNF168,SHLD1,SHLD2,SHLD3_x000D_
GO:0018022	0.00965129	2.1	7.67182	15	125	peptidyl-lysine methylation	GO_BP	CSKMT,EEF1AKMT1,EEF1AKMT2,EEF1AKMT3,EEF2KMT,ETFBKMT,KMT5A,KMT5B,KMT5C,NELFE,NSD2,NSD3,PRDM5,PRDM6,VCPKMT_x000D_
GO:0048286	0.0101096	3.25798	2.45498	7	40	lung alveolus development	GO_BP	FGF10,FGFR2,FOXF1,MYOCD,SELENON,SFTPD,TCF21_x000D_
GO:0034091	0.0102253	9.1977	0.490997	3	8	regulation of maintenance of sister chromatid cohesion	GO_BP	NAA10,SLF1,SLF2_x000D_
GO:0009161	0.0104553	1.65325	18.4124	29	300	ribonucleoside monophosphate metabolic process	GO_BP	AFG1L,AK9,ATP5F1A,ATP5F1B,ATP5F1C,ATP5F1D,ATP5F1E,ATP5IF1,ATP5MC1,ATP5MC2,ATP5MC3,ATP5ME,ATP5MF,ATP5MG,ATP5PB,ATP5PD,ATP5PF,ATP5PO,COX7A1,DMAC2L,ENTPD5,GCK,IGF1,INSR,NIPSNAP2,NUDT4,TIGAR,UQCC2,UQCC3_x000D_
GO:0010526	0.0108299	30.639	0.184124	2	3	negative regulation of transposition, RNA-mediated	GO_BP	TUT4,TUT7_x000D_
GO:0018002	0.0108299	30.639	0.184124	2	3	N-terminal peptidyl-glutamic acid acetylation	GO_BP	NAA10,NAA80_x000D_
GO:0021524	0.0108299	30.639	0.184124	2	3	visceral motor neuron differentiation	GO_BP	ISL2,TBX20_x000D_
GO:0030538	0.0108299	30.639	0.184124	2	3	embryonic genitalia morphogenesis	GO_BP	FGF10,ROR2_x000D_
GO:0038123	0.0108299	30.639	0.184124	2	3	toll-like receptor TLR1:TLR2 signaling pathway	GO_BP	CD14,TLR1_x000D_
GO:0045728	0.0108299	30.639	0.184124	2	3	respiratory burst after phagocytosis	GO_BP	CYBC1,SELENOK_x000D_
GO:0060435	0.0108299	30.639	0.184124	2	3	bronchiole development	GO_BP	FGF10,TCF21_x000D_
GO:0070340	0.0108299	30.639	0.184124	2	3	detection of bacterial lipopeptide	GO_BP	TLR1,TLR6_x000D_
GO:0071727	0.0108299	30.639	0.184124	2	3	cellular response to triacyl bacterial lipopeptide	GO_BP	CD14,TLR1_x000D_
GO:0099163	0.0108299	30.639	0.184124	2	3	synaptic signaling by nitric oxide	GO_BP	GUCY1A1,GUCY1B1_x000D_
GO:0099543	0.0108299	30.639	0.184124	2	3	trans-synaptic signaling by soluble gas	GO_BP	GUCY1A1,GUCY1B1_x000D_
GO:1901003	0.0108299	30.639	0.184124	2	3	negative regulation of fermentation	GO_BP	CAVIN3,TIGAR_x000D_
GO:1990074	0.0108299	30.639	0.184124	2	3	polyuridylation-dependent mRNA catabolic process	GO_BP	TUT4,TUT7_x000D_
GO:1990166	0.0108299	30.639	0.184124	2	3	protein localization to site of double-strand break	GO_BP	SLF1,SLF2_x000D_
GO:2000437	0.0108299	30.639	0.184124	2	3	regulation of monocyte extravasation	GO_BP	PDGFD,PLCB1_x000D_
GO:2000813	0.0108299	30.639	0.184124	2	3	negative regulation of barbed-end actin filament capping	GO_BP	CARMIL1,WASHC2C_x000D_
GO:0001325	0.011166	5.57737	0.920619	4	15	formation of extrachromosomal circular DNA	GO_BP	DNA2,EXO1,SLX1A,SLX1B_x000D_
GO:0034356	0.011166	5.57737	0.920619	4	15	NAD biosynthesis via nicotinamide riboside salvage pathway	GO_BP	NAPRT,NAXD,NAXE,PTGIS_x000D_
GO:0043508	0.011166	5.57737	0.920619	4	15	negative regulation of JUN kinase activity	GO_BP	HIPK3,MAPK8IP1,SFRP2,ZNF675_x000D_
GO:0090737	0.011166	5.57737	0.920619	4	15	telomere maintenance via telomere trimming	GO_BP	DNA2,EXO1,SLX1A,SLX1B_x000D_
GO:0055025	0.0116364	2.6601	3.74385	9	61	positive regulation of cardiac muscle tissue development	GO_BP	ERBB3,FGFR2,IGF1,MIR17HG,MYOCD,TBX20,TBX5,WNT2,ZFPM2_x000D_
GO:0060421	0.0118729	2.85838	3.1301	8	51	positive regulation of heart growth	GO_BP	FGFR2,IGF1,MIR17HG,TBX20,TBX5,WNT2,WT1,ZFPM2_x000D_
GO:0030509	0.0120631	1.93991	9.32894	17	152	BMP signaling pathway	GO_BP	ACVRL1,BMP5,BMP6,BMPER,FAM83G,GATA4,GDF6,GPC3,PCSK6,ROR2,RYR2,SCX,SFRP2,SMAD9,SOX11,SPART,TMEM100_x000D_
GO:0048645	0.012893	2.60976	3.80522	9	62	animal organ formation	GO_BP	AR,FGF10,FGFR2,HOXA3,NTF4,ROBO2,TBX5,WNT2,WT1_x000D_
GO:0045739	0.0136644	3.43166	2.01413	6	33	positive regulation of DNA repair	GO_BP	ABRAXAS1,BABAM2,EYA4,FANCB,FGF10,MRNIP,RNF168,SHLD1,SHLD2,SHLD3,SLF1,SLF2,SPIDR,TIGAR_x000D_
GO:0016446	0.0141772	5.11229	0.981993	4	16	somatic hypermutation of immunoglobulin genes	GO_BP	EXO1,PMS2P1,PMS2P3,PMS2P6_x000D_
GO:0060572	0.0141772	5.11229	0.981993	4	16	morphogenesis of an epithelial bud	GO_BP	AR,FGF10,FGFR2,WNT2_x000D_
GO:0032341	0.014645	7.66431	0.552371	3	9	aldosterone metabolic process	GO_BP	BMP5,BMP6,CACNA1H_x000D_
GO:0034551	0.014645	7.66431	0.552371	3	9	mitochondrial respiratory chain complex III assembly	GO_BP	UQCC1,UQCC2,UQCC3_x000D_
GO:0070544	0.014645	7.66431	0.552371	3	9	histone H3-K36 demethylation	GO_BP	KDM7A,PHF8,RIOX1_x000D_
GO:0003231	0.0161533	2.68321	3.3008	8	54	cardiac ventricle development	GO_BP	CPLANE1,FGFR2,FOXF1,GATA4,KCNK2,MIR17HG,MYOCD,NSD2,PKP2,ROBO2,RYR2,SFRP2,SOX11,TBX20,TBX5,TNNT2,ZFPM2_x000D_
GO:0006302	0.0162425	1.74145	12.6952	21	208	double-strand break repair	GO_BP	ABRAXAS1,ATP23,BABAM2,BRCA2,BRIP1,CYREN,DNA2,ESCO2,EXO1,FANCB,FBH1,HELB,MARF1,MRE11,MRNIP,NSD2,PAXX,RAD51B,RNF168,SEM1,SHLD1,SHLD2,SHLD3,SLF1,SLF2,SLX1A,SLX1B,SPIDR,TENT4A_x000D_
GO:0001556	0.0163929	3.83584	1.53436	5	25	oocyte maturation	GO_BP	EREG,PDE3A,TUT4,TUT7,WASHC5_x000D_
GO:0034080	0.0168165	2.90509	2.70048	7	44	CENP-A containing nucleosome assembly	GO_BP	CENPC,CENPI,CENPP,CENPS,CENPU,CENPX,KNL1_x000D_
GO:0060411	0.0174307	2.32889	4.66447	10	76	cardiac septum morphogenesis	GO_BP	BMP5,FGFR2,GATA4,MIR17HG,NSD2,ROBO2,SOX11,TBX20,TBX5,ZFPM2_x000D_
GO:0090092	0.0183258	1.67282	14.423	23	235	regulation of transmembrane receptor protein serine/threonine kinase signaling pathway	GO_BP	ACVRL1,ASPN,BMP5,BMP6,BMPER,CILP,FGF10,GATA4,GDF6,GPC3,INHBE,ITGA8,LDLRAD4,MIR17HG,MYOCD,NPNT,PCSK6,RASL11B,SFRP2,SOX11,SPART,TBX20,ZEB1_x000D_
GO:0035108	0.0183273	1.92816	8.26859	15	135	limb morphogenesis	GO_BP	C2CD3,CPLANE1,FGF10,FGFR2,FLVCR1,GPC3,LNPK,MAP3K20,OSR2,PRRX1,ROR2,SFRP2,SOX11,TBC1D32,TBX4,TBX5,ZBTB16,ZNF141_x000D_
GO:0010463	0.0188914	2.82848	2.76186	7	45	mesenchymal cell proliferation	GO_BP	FGF7,FGFR2,FOXF1,GPC3,PRRX1,WNT2,ZEB1_x000D_
GO:0000725	0.0198703	1.95825	7.61045	14	124	recombinational repair	GO_BP	BRCA2,FANCB,FBH1,HELB,MRE11,MRNIP,RAD51B,SEM1,SHLD1,SHLD2,SHLD3,SLX1A,SLX1B,SPIDR_x000D_
GO:2001032	0.0198703	6.58345	0.612488	3	10	regulation of double-strand break repair via nonhomologous end joining	GO_BP	CYREN,MRNIP,NSD2,SHLD1,SHLD2,SHLD3_x000D_
GO:0010587	0.0199796	6.56903	0.613746	3	10	miRNA catabolic process	GO_BP	TENT2,TENT4B,TUT4_x000D_
GO:0010838	0.0199796	6.56903	0.613746	3	10	positive regulation of keratinocyte proliferation	GO_BP	FGF10,FGF7,TGM1_x000D_
GO:0098917	0.0199796	6.56903	0.613746	3	10	retrograde trans-synaptic signaling	GO_BP	GUCY1A1,PLCB1,SYT4_x000D_
GO:0034770	0.0207225	15.3422	0.245145	2	4	histone H4-K20 methylation	GO_BP	KMT5A,KMT5B,KMT5C,NSD2_x000D_
GO:0000451	0.0207798	15.3186	0.245498	2	4	rRNA 2'-O-methylation	GO_BP	MRM2,MRM3_x000D_
GO:0021615	0.0207798	15.3186	0.245498	2	4	glossopharyngeal nerve morphogenesis	GO_BP	HOXA3,PLXNA4_x000D_
GO:0034553	0.0207798	15.3186	0.245498	2	4	mitochondrial respiratory chain complex II assembly	GO_BP	SDHAF3,SDHAF4_x000D_
GO:0038124	0.0207798	15.3186	0.245498	2	4	toll-like receptor TLR6:TLR2 signaling pathway	GO_BP	CD14,TLR6_x000D_
GO:0048370	0.0207798	15.3186	0.245498	2	4	lateral mesoderm formation	GO_BP	FOXF1,TBX20_x000D_
GO:0048808	0.0207798	15.3186	0.245498	2	4	male genitalia morphogenesis	GO_BP	AR,FGF10_x000D_
GO:0050923	0.0207798	15.3186	0.245498	2	4	regulation of negative chemotaxis	GO_BP	PLXNA4,ROBO2_x000D_
GO:0061182	0.0207798	15.3186	0.245498	2	4	negative regulation of chondrocyte development	GO_BP	RFLNA,RFLNB_x000D_
GO:0071726	0.0207798	15.3186	0.245498	2	4	cellular response to diacyl bacterial lipopeptide	GO_BP	CD14,TLR6_x000D_
GO:1904431	0.0207798	15.3186	0.245498	2	4	positive regulation of t-circle formation	GO_BP	SLX1A,SLX1B_x000D_
GO:0035113	0.0211592	1.9405	7.67182	14	125	embryonic appendage morphogenesis	GO_BP	C2CD3,CPLANE1,FLVCR1,GPC3,LNPK,MAP3K20,OSR2,PRRX1,ROR2,SFRP2,TBC1D32,TBX4,TBX5,ZBTB16_x000D_
GO:0030539	0.0215124	4.38871	1.10303	4	18	male genitalia development	GO_BP	AR,BMP5,BMP6,FGF10,ROR2,WT1_x000D_
GO:0043931	0.0216227	4.38146	1.10474	4	18	ossification involved in bone maturation	GO_BP	IGF1,RFLNA,RFLNB,XYLT1_x000D_
GO:0048009	0.023919	2.97043	2.27086	6	37	insulin-like growth factor receptor signaling pathway	GO_BP	AR,BMP5,CILP,GHR,IGF1,PLCB1_x000D_
GO:0060045	0.023919	2.97043	2.27086	6	37	positive regulation of cardiac muscle cell proliferation	GO_BP	FGFR2,MIR17HG,TBX20,TBX5,WNT2,ZFPM2_x000D_
GO:1901021	0.023919	2.97043	2.27086	6	37	positive regulation of calcium ion transmembrane transporter activity	GO_BP	CACNA2D1,CRACR2A,KCNE3,NIPSNAP2,RYR2,STIMATE_x000D_
GO:0071772	0.025134	1.76818	10.1268	17	165	response to BMP	GO_BP	ACVRL1,BMP5,BMP6,BMPER,FAM83G,GATA4,GDF6,GPC3,PCSK6,ROR2,RYR2,SCX,SFRP2,SMAD9,SOX11,SPART,TMEM100_x000D_
GO:0030282	0.0255147	2.00542	6.38296	12	104	bone mineralization	GO_BP	ASPN,BMP6,CLEC3B,FGFR2,GPC3,HOXA3,IGF1,OSR2,PTH1R,RFLNA,RFLNB,ROR2_x000D_
GO:0006182	0.0262394	5.74757	0.67512	3	11	cGMP biosynthetic process	GO_BP	GUCY1A1,GUCY1B1,NPR1_x000D_
GO:0010269	0.0262394	5.74757	0.67512	3	11	response to selenium ion	GO_BP	SELENOM,SELENOP,SELENOW_x000D_
GO:0032490	0.0262394	5.74757	0.67512	3	11	detection of molecule of bacterial origin	GO_BP	C4B,TLR1,TLR6_x000D_
GO:0034244	0.0262394	5.74757	0.67512	3	11	negative regulation of transcription elongation from RNA polymerase II promoter	GO_BP	NELFA,NELFE,RNF168_x000D_
GO:0034309	0.0262394	5.74757	0.67512	3	11	primary alcohol biosynthetic process	GO_BP	BMP5,BMP6,CACNA1H_x000D_
GO:0045945	0.0262394	5.74757	0.67512	3	11	positive regulation of transcription by RNA polymerase III	GO_BP	AR,ICE1,ICE2_x000D_
GO:0060174	0.0262394	5.74757	0.67512	3	11	limb bud formation	GO_BP	FGF10,FGFR2,SOX11_x000D_
GO:0071073	0.0262394	5.74757	0.67512	3	11	positive regulation of phospholipid biosynthetic process	GO_BP	FABP3,HTR2B,NR1H4_x000D_
GO:2001034	0.0262394	5.74757	0.67512	3	11	positive regulation of double-strand break repair via nonhomologous end joining	GO_BP	SHLD1,SHLD2,SHLD3_x000D_
GO:0002891	0.0269769	2.87744	2.33223	6	38	positive regulation of immunoglobulin mediated immune response	GO_BP	CD226,NECTIN2,NSD2,SHLD1,SHLD2,SHLD3_x000D_
GO:0009259	0.027256	1.40531	30.9328	42	504	ribonucleotide metabolic process	GO_BP	AFG1L,AK9,ATP5F1A,ATP5F1B,ATP5F1C,ATP5F1D,ATP5F1E,ATP5IF1,ATP5MC1,ATP5MC2,ATP5MC3,ATP5ME,ATP5MF,ATP5MG,ATP5PB,ATP5PD,ATP5PF,ATP5PO,COX7A1,DMAC2L,EFL1,ENTPD5,GCK,GPAT4,GUCY1A1,GUCY1B1,HACD1,HACD2,HTD2,IGF1,INSR,NIPSNAP2,NPR1,NUDT4,PDE1A,PDE4B,PDK4,SULT1E1,TDO2,TIGAR,UQCC2,UQCC3_x000D_
GO:0006163	0.0287607	1.39356	31.9148	43	520	purine nucleotide metabolic process	GO_BP	AFG1L,AK9,ATP5F1A,ATP5F1B,ATP5F1C,ATP5F1D,ATP5F1E,ATP5IF1,ATP5MC1,ATP5MC2,ATP5MC3,ATP5ME,ATP5MF,ATP5MG,ATP5PB,ATP5PD,ATP5PF,ATP5PO,COX7A1,DMAC2L,EFL1,ENTPD5,GCK,GPAT4,GUCY1A1,GUCY1B1,HACD1,HACD2,HTD2,IGF1,INSR,MTHFD2L,NIPSNAP2,NPR1,NUDT4,PDE1A,PDE4B,PDK4,SULT1E1,TDO2,TIGAR,UQCC2,UQCC3_x000D_
GO:0060485	0.0290737	1.62983	13.4673	21	221	mesenchyme development	GO_BP	ACTC1,ACTG2,ACVRL1,BMP5,EPHA3,ERBB3,FGF10,FGFR2,FOXF1,FOXF2,FRZB,GATA4,HGF,HTR2B,KBTBD8,LDLRAD4,MCRIP1,RFLNB,RGCC,ROBO2,SCX,SEMA3D,SFRP2,SOX11,TBX20,TBX5,TCF21,TMEM100,USF3,WNT2,WT1,ZFPM2_x000D_
GO:0061180	0.029103	2.22976	4.35759	9	71	mammary gland epithelium development	GO_BP	AR,AREG,BRCA2,FGF10,FGFR2,FOXF1,IQGAP3,LATS1,WNT2_x000D_
GO:0060541	0.0298006	1.67167	11.9067	19	194	respiratory system development	GO_BP	FGF10,FGF7,FGFR2,FOXF1,GPC3,HIKESHI,HSD11B1,MIR17HG,MYOCD,RIDA,SELENON,SFTPD,SOX11,TBX4,TBX5,TCF21,WNT2,WT1,ZFPM2_x000D_
GO:0045911	0.0302827	2.79008	2.39361	6	39	positive regulation of DNA recombination	GO_BP	FANCB,MRNIP,NSD2,SHLD1,SHLD2,SHLD3_x000D_
GO:2001222	0.0302827	2.79008	2.39361	6	39	regulation of neuron migration	GO_BP	ADGRG1,GPR173,IGSF10,SHTN1,SRGAP2C,ULK4_x000D_
GO:0071840	0.0309746	1.128	399.303	429	6506	cellular component organization or biogenesis	GO_BP	A2M,ABCG1,ABRAXAS1,ABRAXAS2,ACTC1,ACVRL1,ADAMTS4,ADGRB2,ADGRG6,ADGRL1,AFDN,AFG1L,AGTR1,AMPH,ANO4,ANOS1,ANXA8L1,APOD,AR,AREG,ARHGAP25,ARHGEF26,ARPIN,ATG101,ATP5F1A,ATP5F1B,ATP5F1C,ATP5F1D,ATP5F1E,ATP5IF1,ATP5MC1,ATP5MC2,ATP5MC3,ATP5ME,ATP5MF,ATP5MG,ATP5PB,ATP5PD,ATP5PF,ATP5PO,ATP8B4,AVIL,AZIN2,B4GAT1,BABAM2,BBIP1,BBOF1,BDKRB1,BFSP1,BMP5,BMT2,BOLA2B,BRCA2,BRIP1,BRWD3,BST2,BUD23,C2,C2CD3,C4B,CARMIL1…
GO:0003215	0.0310718	3.83333	1.22749	4	20	cardiac right ventricle morphogenesis	GO_BP	GATA4,MIR17HG,TBX20,ZFPM2_x000D_
GO:0003283	0.0310718	3.83333	1.22749	4	20	atrial septum development	GO_BP	GATA4,NSD2,TBX20,TBX5_x000D_
GO:0060039	0.0310718	3.83333	1.22749	4	20	pericardium development	GO_BP	BMP5,TBX20,TBX5,WT1_x000D_
GO:0097503	0.0310718	3.83333	1.22749	4	20	sialylation	GO_BP	ST3GAL6,ST6GAL2,ST6GALNAC3,ST6GALNAC5_x000D_
GO:0003281	0.0315195	2.19424	4.41897	9	72	ventricular septum development	GO_BP	CPLANE1,FGFR2,GATA4,MIR17HG,NSD2,ROBO2,SOX11,TBX5,ZFPM2_x000D_
GO:0060425	0.0319781	2.49887	3.06873	7	50	lung morphogenesis	GO_BP	FGF10,FGF7,FGFR2,FOXF1,SOX11,TCF21,WNT2_x000D_
GO:0051052	0.0323292	1.43317	25.2863	35	412	regulation of DNA metabolic process	GO_BP	ABRAXAS1,ACVRL1,BABAM2,CYREN,DNA2,EREG,ESCO2,EYA4,FANCB,FBH1,FGF10,HELB,HGF,KCNK2,MRE11,MRNIP,NSD2,PAM16,RGCC,RNF168,SHLD1,SHLD2,SHLD3,SLF1,SLF2,SLFN11,SLX1A,SLX1B,SPIDR,STN1,TENT4B,TET1,TIGAR,WAPL,WT1_x000D_
GO:0042147	0.0326208	2.07616	5.15546	10	84	retrograde transport, endosome to Golgi	GO_BP	PHETA1,PHETA2,RAB29,RAB7B,RBSN,RIC1,WASH6P,WASHC1,WASHC2A,WASHC2C_x000D_
GO:0046620	0.0330162	1.92142	6.62845	12	108	regulation of organ growth	GO_BP	FGFR2,FLVCR1,IGF1,KCNK2,LATS1,MIR17HG,TBX20,TBX5,WNT2,WT1,WWC2,ZFPM2_x000D_
GO:0002865	0.0332333	10.2118	0.306873	2	5	negative regulation of acute inflammatory response to antigenic stimulus	GO_BP	IL20RB,SELENOS_x000D_
GO:0003289	0.0332333	10.2118	0.306873	2	5	atrial septum primum morphogenesis	GO_BP	GATA4,NSD2_x000D_
GO:0006269	0.0332333	10.2118	0.306873	2	5	DNA replication, synthesis of RNA primer	GO_BP	HELB,PRIMPOL_x000D_
GO:0010991	0.0332333	10.2118	0.306873	2	5	negative regulation of SMAD protein complex assembly	GO_BP	LDLRAD4,TBX20_x000D_
GO:0014834	0.0332333	10.2118	0.306873	2	5	skeletal muscle satellite cell maintenance involved in skeletal muscle regeneration	GO_BP	IGF1,SELENON_x000D_
GO:0032237	0.0332333	10.2118	0.306873	2	5	activation of store-operated calcium channel activity	GO_BP	CRACR2A,STIMATE_x000D_
GO:0034184	0.0332333	10.2118	0.306873	2	5	positive regulation of maintenance of mitotic sister chromatid cohesion	GO_BP	SLF1,SLF2_x000D_
GO:0045875	0.0332333	10.2118	0.306873	2	5	negative regulation of sister chromatid cohesion	GO_BP	NAA10,WAPL_x000D_
GO:0060664	0.0332333	10.2118	0.306873	2	5	epithelial cell proliferation involved in salivary gland morphogenesis	GO_BP	FGF10,FGFR2_x000D_
GO:0061056	0.0332333	10.2118	0.306873	2	5	sclerotome development	GO_BP	SCX,SFRP2_x000D_
GO:0061302	0.0332333	10.2118	0.306873	2	5	smooth muscle cell-matrix adhesion	GO_BP	APOD,VTN_x000D_
GO:0071502	0.0332333	10.2118	0.306873	2	5	cellular response to temperature stimulus	GO_BP	HTR1B,HTR2B_x000D_
GO:0097070	0.0332333	10.2118	0.306873	2	5	ductus arteriosus closure	GO_BP	FOXF1,MYOCD_x000D_
GO:1900158	0.0332333	10.2118	0.306873	2	5	negative regulation of bone mineralization involved in bone maturation	GO_BP	RFLNA,RFLNB_x000D_
GO:1901843	0.0332333	10.2118	0.306873	2	5	positive regulation of high voltage-gated calcium channel activity	GO_BP	CACNA2D1,NIPSNAP2_x000D_
GO:2000195	0.0332333	10.2118	0.306873	2	5	negative regulation of female gonad development	GO_BP	WT1,ZFPM2_x000D_
GO:0006390	0.0332791	5.1177	0.735277	3	12	mitochondrial transcription	GO_BP	MTERF1,MTERF2,MTERF3,MTERF4,TWNK_x000D_
GO:0097428	0.0332791	5.1177	0.735277	3	12	protein maturation by iron-sulfur cluster transfer	GO_BP	BOLA2B,CIAO2A,CIAO2B,LTO1,YAE1_x000D_
GO:0003207	0.0334216	5.10866	0.736495	3	12	cardiac chamber formation	GO_BP	SOX11,TBX20,TBX5_x000D_
GO:0006705	0.0334216	5.10866	0.736495	3	12	mineralocorticoid biosynthetic process	GO_BP	BMP5,BMP6,CACNA1H_x000D_
GO:0044650	0.0334216	5.10866	0.736495	3	12	adhesion of symbiont to host cell	GO_BP	NECTIN1,NECTIN2,SFTPD_x000D_
GO:0071044	0.0334216	5.10866	0.736495	3	12	histone mRNA catabolic process	GO_BP	TENT2,TENT4A,TENT4B_x000D_
GO:0072520	0.0334216	5.10866	0.736495	3	12	seminiferous tubule development	GO_BP	ADGRG1,AR,BRIP1_x000D_
GO:0099550	0.0334216	5.10866	0.736495	3	12	trans-synaptic signaling, modulating synaptic transmission	GO_BP	GUCY1A1,GUCY1B1,SYT4_x000D_
GO:0030308	0.0341033	1.66893	11.2929	18	184	negative regulation of cell growth	GO_BP	ACVRL1,BDKRB1,BST2,CCAR2,FRZB,GAL,GNG4,JADE1,MEG3,MINAR1,NPR1,PRDM11,RACK1,RERG,SEMA3D,SFRP2,SPART,WT1_x000D_
GO:0003209	0.0341911	3.06779	1.84124	5	30	cardiac atrium morphogenesis	GO_BP	GATA4,NSD2,TBX20,TBX5,WNT2_x000D_
GO:0010719	0.0341911	3.06779	1.84124	5	30	negative regulation of epithelial to mesenchymal transition	GO_BP	BMP5,LDLRAD4,SFRP2,TBX5,USF3_x000D_
GO:0090314	0.0341911	3.06779	1.84124	5	30	positive regulation of protein targeting to membrane	GO_BP	CEMIP,MIEF1,MIEF2,MTCL1,TCAF1_x000D_
GO:0007005	0.0346434	1.4404	23.7181	33	392	mitochondrion organization	GO_BP	ADGRG6,AFG1L,ATP5F1A,ATP5F1B,ATP5F1C,ATP5F1D,ATP5F1E,ATP5IF1,ATP5MC1,ATP5MC2,ATP5MC3,ATP5ME,ATP5MF,ATP5MG,ATP5PB,ATP5PD,ATP5PF,ATP5PO,CCAR2,COX7A1,DMAC1,DMAC2,DMAC2L,DNA2,E2F1,FMC1,HGF,IGF1,MAIP1,MIEF1,MIEF2,MIGA1,MIGA2,MTERF1,MTERF4,NDUFAF6,NDUFAF8,NECTIN2,PAM16,PET100,PET117,PRIMPOL,RAB29,RCC1L,RHOU,RTL10,SDHAF3,SDHAF4,SELENON,STPG1,TIGAR,TIMM29,TOMM70,TWNK,UQCC1,UQCC2,UQCC3_x000D_
GO:0043062	0.036396	1.42573	24.6726	34	402	extracellular structure organization	GO_BP	A2M,ABCG1,ADAMTS4,AGTR1,COL10A1,COL15A1,COL5A3,COL9A2,COL9A3,CSGALNACT1,CTSL,CTSV,DPT,ECM2,ERO1A,ERO1B,FMOD,FOXF1,FOXF2,ITGA7,ITGA8,KAZALD1,LAMA2,MELTF,NPNT,P3H4,RAMP2,RGCC,SCX,SFRP2,TNXB,VTN,WASHC1,WT1_x000D_
GO:0007095	0.036573	3.60764	1.28887	4	21	mitotic G2 DNA damage checkpoint	GO_BP	CLSPN,MRE11,MRNIP,NOP53_x000D_
GO:0003206	0.0368895	2.64442	2.50388	6	41	cardiac chamber morphogenesis	GO_BP	ADGRG6,BMP5,FGFR2,FOXF1,GATA4,MIR17HG,NSD2,PKP2,ROBO2,RYR2,SFRP2,SOX11,TBX20,TBX5,TNNT2,WNT2,ZFPM2_x000D_
GO:0048636	0.0375385	2.02129	5.27821	10	86	positive regulation of muscle organ development	GO_BP	ERBB3,FGFR2,IGF1,MIR17HG,MRTFB,MYOCD,TBX20,TBX5,WNT2,ZFPM2_x000D_
GO:0030199	0.03858	2.38753	3.19148	7	52	collagen fibril organization	GO_BP	COL5A3,DPT,FMOD,P3H4,SCX,SFRP2,TNXB_x000D_
GO:0051150	0.03858	2.38753	3.19148	7	52	regulation of smooth muscle cell differentiation	GO_BP	EREG,FGFR2,FOXF1,MYOCD,OLFM2,PRDM6,ZEB1_x000D_
GO:0016577	0.0387781	2.94963	1.90261	5	31	histone demethylation	GO_BP	KDM6B,KDM7A,PHF8,RIOX1,RIOX2_x000D_
GO:1901863	0.0401798	1.99492	5.33959	10	87	positive regulation of muscle tissue development	GO_BP	ERBB3,FGFR2,IGF1,MIR17HG,MRTFB,MYOCD,TBX20,TBX5,WNT2,ZFPM2_x000D_
GO:0010467	0.0409204	1.13193	298.869	324	5012	gene expression	GO_BP	A2M,ABCA2,ABCG1,ACTC1,ACTG2,ACVRL1,AR,BACH2,BARX1,BMP5,BMP6,BMPER,BMT2,BOLA2B,BRCA2,BRIP1,BRWD3,BUD23,C2,C2CD3,C3orf33,C4B,C6,C7,C8orf88,CAMK4,CAPN15,CARMN,CASP1,CAVIN1,CAVIN3,CBX2,CCAR2,CCNQ,CD4,CDKAL1,CIAO2A,CIAO2B,CIAO3,CILP,CIPC,CLEC3B,CMTR1,CMTR2,CNOT9,CORIN,CPZ,CRAMP1,CYTL1,DCAF1,DDI2,DIO2,DNM3OS,DPH7,DUS2,DXO,E2F1,EBF4,EDRF1,EEF1A1P5,EFL1,ELK4,ELOA,ELOB,ELOC,ELP1,EMSY,ERBB3,ERBIN,EREG,ERO1…
GO:0006264	0.0415124	4.59753	0.797869	3	13	mitochondrial DNA replication	GO_BP	DNA2,PRIMPOL,TWNK_x000D_
GO:0010642	0.0415124	4.59753	0.797869	3	13	negative regulation of platelet-derived growth factor receptor signaling pathway	GO_BP	APOD,MYOCD,PTGIR_x000D_
GO:0050862	0.0415124	4.59753	0.797869	3	13	positive regulation of T cell receptor signaling pathway	GO_BP	CD226,NECTIN2,RAB29_x000D_
GO:0060601	0.0415124	4.59753	0.797869	3	13	lateral sprouting from an epithelium	GO_BP	AR,FGF10,FGFR2_x000D_
GO:0086004	0.0417462	2.55713	2.57773	6	42	regulation of cardiac muscle cell contraction	GO_BP	GATA4,KCNE3,PDE4B,PKP2,PLN,RYR2_x000D_
GO:0051145	0.0419344	3.42543	1.34346	4	22	smooth muscle cell differentiation	GO_BP	EREG,FGF10,FGFR2,FOXF1,ITGA8,MRTFA,MRTFB,MYOCD,NPNT,OLFM2,PRDM6,RAMP2,ZEB1_x000D_
GO:0043954	0.0421919	2.33549	3.25285	7	53	cellular component maintenance	GO_BP	INSR,LNPK,MYOCD,OPHN1,PKP2,SYNGAP1,ZNF804A_x000D_
GO:0006355	0.042432	1.28909	47.9773	60	813	regulation of transcription, DNA-templated	GO_BP	ABCA2,ABCG1,ACVRL1,AR,BACH2,BARX1,BMP5,BMP6,BMPER,BOLA2B,BRCA2,BRIP1,BRWD3,C3orf33,CAMK4,CAPN15,CBX2,CCAR2,CCNQ,CD4,CIPC,CRAMP1,CYTL1,DCAF1,E2F1,EBF4,EDRF1,ELK4,ELOA,ELOB,ELOC,ELP1,EMSY,ERBIN,EREG,FAM83G,FGF10,FGF7,FGFR2,FOXF1,FOXF2,GAL,GATA4,GCN1,GDF6,GLI4,GLMP,GPC3,GTF2H2C,HCLS1,HDX,HGF,HHEX,HOXA3,ICE1,ICE2,IGF1,IL18R1,IL33,INSR,IRAK3,ISL2,ITGA8,KDM6B,KDM7A,KMT5A,KRBOX1,L3MBTL1,LHX2,MAP3K13,MAP…
GO:0001759	0.0425981	3.40701	1.35024	4	22	organ induction	GO_BP	AR,FGF10,ROBO2,WNT2_x000D_
GO:0007530	0.0425981	3.40701	1.35024	4	22	sex determination	GO_BP	AR,INSR,TCF21,WT1_x000D_
GO:0010804	0.0425981	3.40701	1.35024	4	22	negative regulation of tumor necrosis factor-mediated signaling pathway	GO_BP	CCDC3,NR1H4,TRAIP,ZNF675_x000D_
GO:0016226	0.0425981	3.40701	1.35024	4	22	iron-sulfur cluster assembly	GO_BP	BOLA2B,CIAO2A,CIAO2B,CIAO3_x000D_
GO:0035584	0.0425981	3.40701	1.35024	4	22	calcium-mediated signaling using intracellular calcium source	GO_BP	ADGRL1,GPR143,RYR2,STIMATE_x000D_
GO:0035929	0.0425981	3.40701	1.35024	4	22	steroid hormone secretion	GO_BP	AGTR1,BMP6,GAL,SELENOM_x000D_
GO:0046339	0.0425981	3.40701	1.35024	4	22	diacylglycerol metabolic process	GO_BP	DGKE,DGKH,GPAT4,PLCE1_x000D_
GO:0045920	0.0437224	2.84022	1.96399	5	32	negative regulation of exocytosis	GO_BP	CBARP,FOXF1,RSC1A1,STXBP6,SYT4_x000D_
GO:0001570	0.045698	2.03231	4.72584	9	77	vasculogenesis	GO_BP	ACKR3,FOXF1,MYOCD,RAMP2,RASIP1,TBX5,TMEM100,WT1,ZFPM2_x000D_
GO:0051270	0.0463774	1.24131	64.5661	78	1052	regulation of cellular component movement	GO_BP	ACKR3,ACVRL1,ADGRA2,ADGRG1,AFDN,APOD,ARPIN,ATP5F1A,ATP5F1B,BDKRB1,BMP5,BMPER,BST2,CARMIL1,CASS4,CAVIN1,CEMIP,CFAP20,CFAP298,CXCL14,ELP1,ERBB3,EREG,F10,FGF10,FGF7,FOXF1,GATA4,GPR173,HGF,IGF1,IGSF10,IL33,INSR,JCAD,KCNE3,LAMA2,LDLRAD4,MEOX2,MGAT5,MYOCD,PDE4B,PDGFD,PKP2,PLCB1,PLN,PLPP3,PLXNA4,PLXNC1,PRAG1,PRKG1,RACK1,RGCC,RIPOR1,ROR2,RYR2,SELENOK,SEMA3D,SFRP2,SHTN1,SINHCAF,SLC8B1,SRGAP2B,SRGAP2C,STK2…
GO:0070252	0.0470348	1.80776	6.9967	12	114	actin-mediated cell contraction	GO_BP	ACTC1,CACNA2D1,GATA4,KCNE3,KCNE4,KCNH2,PDE4B,PKP2,PLN,RYR2,SHTN1,TNNT2_x000D_
GO:0000706	0.0478461	7.65843	0.368247	2	6	meiotic DNA double-strand break processing	GO_BP	BRIP1,EXO1_x000D_
GO:0007354	0.0478461	7.65843	0.368247	2	6	zygotic determination of anterior/posterior axis, embryo	GO_BP	PCSK6,WT1_x000D_
GO:0010756	0.0478461	7.65843	0.368247	2	6	positive regulation of plasminogen activation	GO_BP	CLEC3B,MELTF_x000D_
GO:0010792	0.0478461	7.65843	0.368247	2	6	DNA double-strand break processing involved in repair via single-strand annealing	GO_BP	SLX1A,SLX1B_x000D_
GO:0032347	0.0478461	7.65843	0.368247	2	6	regulation of aldosterone biosynthetic process	GO_BP	BMP5,BMP6_x000D_
GO:0034773	0.0478461	7.65843	0.368247	2	6	histone H4-K20 trimethylation	GO_BP	KMT5B,KMT5C_x000D_
GO:0035931	0.0478461	7.65843	0.368247	2	6	mineralocorticoid secretion	GO_BP	AGTR1,BMP6_x000D_
GO:0036265	0.0478461	7.65843	0.368247	2	6	RNA (guanine-N7)-methylation	GO_BP	BUD23,RAMAC_x000D_
GO:0042796	0.0478461	7.65843	0.368247	2	6	snRNA transcription by RNA polymerase III	GO_BP	ICE1,ICE2_x000D_
GO:0043152	0.0478461	7.65843	0.368247	2	6	induction of bacterial agglutination	GO_BP	SFTPD,SPON2_x000D_
GO:0043553	0.0478461	7.65843	0.368247	2	6	negative regulation of phosphatidylinositol 3-kinase activity	GO_BP	RUBCN,WASHC1_x000D_
GO:0051891	0.0478461	7.65843	0.368247	2	6	positive regulation of cardioblast differentiation	GO_BP	GATA4,TBX5_x000D_
GO:0060426	0.0478461	7.65843	0.368247	2	6	lung vasculature development	GO_BP	FOXF1,TCF21_x000D_
GO:0061511	0.0478461	7.65843	0.368247	2	6	centriole elongation	GO_BP	C2CD3,CEP295_x000D_
GO:0097052	0.0478461	7.65843	0.368247	2	6	L-kynurenine metabolic process	GO_BP	KYAT1,KYAT3_x000D_
GO:0098880	0.0478461	7.65843	0.368247	2	6	maintenance of postsynaptic specialization structure	GO_BP	OPHN1,SYNGAP1_x000D_
GO:1901897	0.0478461	7.65843	0.368247	2	6	regulation of relaxation of cardiac muscle	GO_BP	PDE4B,PLN_x000D_
GO:1902302	0.0478461	7.65843	0.368247	2	6	regulation of potassium ion export	GO_BP	KCNE3,KCNH2_x000D_
GO:2000564	0.0478461	7.65843	0.368247	2	6	regulation of CD8-positive, alpha-beta T cell proliferation	GO_BP	MAPK8IP1,VSIR_x000D_
GO:2000858	0.0478461	7.65843	0.368247	2	6	regulation of aldosterone secretion	GO_BP	AGTR1,BMP6_x000D_
GO:0034764	0.0484748	1.59145	11.7839	18	192	positive regulation of transmembrane transport	GO_BP	AZIN2,BDKRB1,CACNA2D1,CEMIP,CRACR2A,FXYD1,GAL,GPC3,IGF1,INSR,ITLN1,KCNE3,KCNH2,NIPSNAP2,RYR2,STIMATE,TCAF1,TRPC6_x000D_
GO:0048523	0.0485431	1.12577	279.113	303	4575	negative regulation of cellular process	GO_BP	A2M,ABCG1,ABRAXAS1,ACKR3,ACTC1,ACVRL1,ADAMTS8,ADGRA2,ADGRG1,AFDN,ANOS1,ANXA8L1,APCDD1,APOD,AR,AREG,ARHGAP25,ARPIN,ASPN,ATP5F1A,ATP5F1B,ATP5IF1,AVIL,BABAM2,BACH2,BARX1,BCHE,BDKRB1,BDKRB2,BEX3,BMP5,BMP6,BMPER,BMT2,BRCA2,BRIP1,BST2,C3orf33,C4B,C8orf88,CARD19,CARMIL1,CASTOR1,CASTOR2,CASTOR3,CAVIN3,CBARP,CBX2,CCAR2,CCDC3,CD14,CEMIP,CEP97,CGREF1,CILP,CIPC,CLSPN,CNOT9,CPTP,CXCL14,CYREN,DCAF1,DEPDC5,DEPT…
GO:0008214	0.0490271	2.73862	2.02536	5	33	protein dealkylation	GO_BP	KDM6B,KDM7A,PHF8,RIOX1,RIOX2_x000D_
GO:0017004	0.0490271	2.73862	2.02536	5	33	cytochrome complex assembly	GO_BP	PET100,PET117,UQCC1,UQCC2,UQCC3_x000D_
GO:0003272	0.0491474	3.22751	1.41162	4	23	endocardial cushion formation	GO_BP	BMP5,ROBO2,TBX20,TMEM100_x000D_
GO:0006688	0.0491474	3.22751	1.41162	4	23	glycosphingolipid biosynthetic process	GO_BP	B3GALT2,LARGE1,ST6GALNAC3,ST6GALNAC5_x000D_
GO:0032367	0.0491474	3.22751	1.41162	4	23	intracellular cholesterol transport	GO_BP	ABCA2,ABCG1,CES1,RELCH_x000D_
GO:0006753	0.0496584	1.30057	40.3231	51	657	nucleoside phosphate metabolic process	GO_BP	AFG1L,AK6,AK9,ATP5F1A,ATP5F1B,ATP5F1C,ATP5F1D,ATP5F1E,ATP5IF1,ATP5MC1,ATP5MC2,ATP5MC3,ATP5ME,ATP5MF,ATP5MG,ATP5PB,ATP5PD,ATP5PF,ATP5PO,COX7A1,DMAC2L,EFL1,ENTPD5,FMO2,GCK,GPAT4,GUCY1A1,GUCY1B1,HACD1,HACD2,HTD2,IGF1,INSR,MTHFD2L,NAPRT,NAXD,NAXE,NEIL1,NIPSNAP2,NPR1,NUDT4,PDE1A,PDE4B,PDK4,PTGIS,PUDP,SULT1E1,TDO2,TIGAR,UQCC2,UQCC3_x000D_
GO:0000276	6.37411e-10	68.6921	0.68096	9	11	mitochondrial proton-transporting ATP synthase complex, coupling factor F(o)	GO_CC	ATP5MC1,ATP5MC2,ATP5MC3,ATP5ME,ATP5MF,ATP5MG,ATP5PB,ATP5PD,ATP5PF_x000D_
GO:0044424	1.52845e-08	1.51367	925.054	1003	14943	intracellular part	GO_CC	A2M,ABCA2,ABCA6,ABCA8,ABCA9,ABCG1,ABRAXAS1,ABRAXAS2,ACKR3,ACTC1,ACTG2,ADAMTS4,ADGRB2,ADGRE5,ADGRL4,ADH1B,AFDN,AFG1L,AK6,AK9,ALG10,ALPK1,AMPH,ANO8,APOD,AQP3,AR,AREG,ARHGAP25,ARHGEF25,ARHGEF26,ARRDC1-AS1,ATG101,ATP23,ATP5F1A,ATP5F1B,ATP5F1C,ATP5F1D,ATP5F1E,ATP5IF1,ATP5MC1,ATP5MC2,ATP5MC3,ATP5MD,ATP5ME,ATP5MF,ATP5MG,ATP5MPL,ATP5PB,ATP5PD,ATP5PF,ATP5PO,ATP8B4,AVIL,AZIN2,B3GALT2,B3GLCT,B3GNT10,B4GALNT…
GO:0043226	1.26312e-07	1.42911	867.42	945	14012	organelle	GO_CC	A2M,ABCA2,ABCA6,ABCA8,ABCA9,ABCG1,ABRAXAS1,ABRAXAS2,ACKR3,ACTC1,ACTG2,ADAMTS4,ADGRB2,ADGRE5,ADGRG1,ADGRL1,ADGRL4,ADH1B,AFDN,AFG1L,AK6,AK9,ALG10,AMPH,AMY2B,ANGPTL1,ANO8,APOD,AQP3,AR,AREG,ARHGEF25,ARL15,ATG101,ATP23,ATP5F1A,ATP5F1B,ATP5F1C,ATP5F1D,ATP5F1E,ATP5IF1,ATP5MC1,ATP5MC2,ATP5MC3,ATP5MD,ATP5ME,ATP5MF,ATP5MG,ATP5MPL,ATP5PB,ATP5PD,ATP5PF,ATP5PO,ATP8B4,AVIL,AZIN2,B3GALT2,B3GLCT,B3GNT10,B4GALNT4…
GO:0033177	4.33643e-07	11.7449	1.42383	10	23	proton-transporting two-sector ATPase complex, proton-transporting domain	GO_CC	ATP5MC1,ATP5MC2,ATP5MC3,ATP5ME,ATP5MF,ATP5MG,ATP5PB,ATP5PD,ATP5PF,DMAC2L_x000D_
GO:0005634	2.57784e-06	1.31495	485.587	562	7844	nucleus	GO_CC	ABCA6,ABRAXAS1,ABRAXAS2,ACKR3,ADAMTS4,ADH1B,AFDN,AK6,AK9,AQP3,AR,AREG,ATP23,ATP5F1A,ATP5F1B,ATP5MF,ATP5PB,ATP5PD,ATP5PO,AZIN2,BABAM2,BACH2,BARX1,BCHE,BEX3,BICRAL,BMT2,BOLA2B,BRCA2,BRIP1,BRWD3,BTBD8,BUD23,CAMK4,CARD19,CARMIL1,CARNMT1,CAVIN1,CAVIN2,CBSL,CBX2,CCAR2,CCDC69,CCDC89,CCNE2,CCNQ,CDK15,CDKL5,CEMIP,CENPC,CENPI,CENPP,CENPS,CENPU,CENPX,CEP162,CFAP20,CFAP298,CFAP36,CIAO2A,CIAO2B,CIPC,CLEC3B,CL…
GO:0071203	4.22272e-06	17.7758	0.804771	7	13	WASH complex	GO_CC	WASH6P,WASHC1,WASHC2A,WASHC2C,WASHC3,WASHC4,WASHC5_x000D_
GO:0000275	5.13491e-06	76.0767	0.371433	5	6	mitochondrial proton-transporting ATP synthase complex, catalytic core F(1)	GO_CC	ATP5F1A,ATP5F1B,ATP5F1C,ATP5F1D,ATP5F1E_x000D_
GO:0043240	6.53854e-05	13.0482	0.804771	6	13	Fanconi anaemia nuclear complex	GO_CC	CENPS,CENPX,FAAP100,FAAP20,FAAP24,FANCB_x000D_
GO:0044455	0.00024312	2.23109	13.6564	28	221	mitochondrial membrane part	GO_CC	ATP5F1A,ATP5F1B,ATP5F1C,ATP5F1D,ATP5F1E,ATP5MC1,ATP5MC2,ATP5MC3,ATP5MD,ATP5ME,ATP5MF,ATP5MG,ATP5MPL,ATP5PB,ATP5PD,ATP5PF,ATP5PO,COQ8A,COQ8B,COX7A1,DMAC1,DMAC2,MCUB,MTLN,PAM16,PET100,SDHAF4,SLC8B1,TIMM29,TOMM70,UQCC3_x000D_
GO:0030532	0.000266609	2.92136	6.56198	17	106	small nuclear ribonucleoprotein complex	GO_CC	RNU1-1,RNU1-2,RNU1-4,RNU4-1,RNU4-2,RNU5A-1,RNU5B-1,RNU5D-1,RNU5E-1,RNU5F-1,RNVU1-15,RNVU1-18,RNVU1-19,RNVU1-6,RNVU1-7,SF3B6,SNU13_x000D_
GO:0015030	0.000640611	3.20089	4.64291	13	75	Cajal body	GO_CC	AK6,ICE1,ICE2,SCARNA1,SCARNA13,SCARNA21,SCARNA22,SCARNA5,SMN2,SNHG10,SNORA38,TERC,ZPR1_x000D_
GO:0099078	0.00083625	15.2003	0.495244	4	8	BORC complex	GO_CC	BORCS5,BORCS6,BORCS7,BORCS8_x000D_
GO:0031499	0.00090291	45.5708	0.247622	3	4	TRAMP complex	GO_CC	MTREX,TENT4A,TENT4B_x000D_
GO:0098798	0.00147765	1.90875	16.7764	30	271	mitochondrial protein complex	GO_CC	ATP5F1A,ATP5F1B,ATP5F1C,ATP5F1D,ATP5F1E,ATP5MC1,ATP5MC2,ATP5MC3,ATP5MD,ATP5ME,ATP5MF,ATP5MG,ATP5MPL,ATP5PB,ATP5PD,ATP5PF,ATP5PO,COX7A1,DMAC1,DMAC2,DNA2,MCUB,MRPL57,MRPL58,MTERF4,PAM16,SDHAF4,TIMM29,TOMM70,UQCC3_x000D_
GO:0005685	0.00162322	4.20136	2.2905	8	37	U1 snRNP	GO_CC	RNU1-1,RNU1-2,RNU1-4,RNVU1-15,RNVU1-18,RNVU1-19,RNVU1-6,RNVU1-7_x000D_
GO:0035861	0.00181255	3.38709	3.4048	10	55	site of double-strand break	GO_CC	ESCO2,HELB,MRE11,PAXX,RNF168,SHLD1,SHLD2,SHLD3,SLF1,SLF2_x000D_
GO:0046540	0.00194618	4.0611	2.35241	8	38	U4/U6 x U5 tri-snRNP complex	GO_CC	RNU4-1,RNU4-2,RNU5A-1,RNU5B-1,RNU5D-1,RNU5E-1,RNU5F-1,SNU13_x000D_
GO:0005753	0.0020871	23.0463	0.306232	3	5	mitochondrial proton-transporting ATP synthase complex	GO_CC	ATP5F1A,ATP5F1B,ATP5F1C,ATP5F1D,ATP5F1E,ATP5MC1,ATP5MC2,ATP5MC3,ATP5MD,ATP5ME,ATP5MF,ATP5MG,ATP5MPL,ATP5PB,ATP5PD,ATP5PF,ATP5PO_x000D_
GO:0097361	0.00215305	22.7842	0.309527	3	5	CIA complex	GO_CC	CIAO2A,CIAO2B,CIAO3_x000D_
GO:0043231	0.00296962	1.31375	132.974	161	2523	intracellular membrane-bounded organelle	GO_CC	ABCA2,ABCA6,ABCA8,ABCA9,ABCG1,ABRAXAS1,ABRAXAS2,ACKR3,ADAMTS4,ADH1B,AFDN,AFG1L,AK6,AK9,ALG10,ANO8,APOD,AQP3,AR,AREG,ATG101,ATP23,ATP5F1A,ATP5F1B,ATP5F1C,ATP5F1D,ATP5F1E,ATP5IF1,ATP5MC1,ATP5MC2,ATP5MC3,ATP5MD,ATP5ME,ATP5MF,ATP5MG,ATP5MPL,ATP5PB,ATP5PD,ATP5PF,ATP5PO,ATP8B4,AZIN2,B3GALT2,B3GLCT,B3GNT10,B4GALNT4,B4GAT1,BABAM2,BACH2,BARX1,BCHE,BCLAF3,BDKRB1,BEX3,BICRAL,BMT2,BOLA2B,BORCS5,BORCS6,BORCS7…
GO:0033178	0.00298076	6.33595	1.05239	5	17	proton-transporting two-sector ATPase complex, catalytic domain	GO_CC	ATP5F1A,ATP5F1B,ATP5F1C,ATP5F1D,ATP5F1E_x000D_
GO:0005740	0.00310593	1.48153	45.191	64	730	mitochondrial envelope	GO_CC	AFG1L,ATP5F1A,ATP5F1B,ATP5F1C,ATP5F1D,ATP5F1E,ATP5MC1,ATP5MC2,ATP5MC3,ATP5MD,ATP5ME,ATP5MF,ATP5MG,ATP5MPL,ATP5PB,ATP5PD,ATP5PF,ATP5PO,CARD19,CEBPZOS,COA7,COQ8A,COQ8B,COX7A1,DHFR2,DMAC1,DMAC2,DMAC2L,FLVCR1,MAIP1,MAPK8IP1,MCUB,MIEF1,MIEF2,MIGA1,MIGA2,MRPL57,MRPL58,MTERF3,MTHFD2L,MTLN,NDUFAF6,NIPSNAP2,PAM16,PET100,PLA2G4A,PLN,PRELID3A,PRELID3B,QTRT2,RCC1L,SDHAF3,SDHAF4,SLC25A53,SLC8B1,SPART,SQOR,STM…
GO:0061700	0.00484136	7.59852	0.742866	4	12	GATOR2 complex	GO_CC	CASTOR1,CASTOR2,CASTOR3,SESN3_x000D_
GO:0031975	0.00744381	1.33406	72.4294	93	1170	envelope	GO_CC	AFG1L,AK9,ATP5F1A,ATP5F1B,ATP5F1C,ATP5F1D,ATP5F1E,ATP5MC1,ATP5MC2,ATP5MC3,ATP5MD,ATP5ME,ATP5MF,ATP5MG,ATP5MPL,ATP5PB,ATP5PD,ATP5PF,ATP5PO,BCHE,BRIP1,CARD19,CEBPZOS,COA7,COQ8A,COQ8B,COX7A1,CPTP,DHFR2,DMAC1,DMAC2,DMAC2L,ERBIN,FLVCR1,GCH1,HACD3,INSR,JPT1,LMNB1,MACO1,MAIP1,MAPK8IP1,MCUB,MIEF1,MIEF2,MIGA1,MIGA2,MINDY3,MRPL57,MRPL58,MTERF3,MTHFD2L,MTLN,NDUFAF6,NEMP1,NEMP2,NIPSNAP2,NPIPA1,NUP58,PAM16,PE…
GO:0005682	0.0098039	4.47122	1.36192	5	22	U5 snRNP	GO_CC	RNU5A-1,RNU5B-1,RNU5D-1,RNU5E-1,RNU5F-1_x000D_
GO:0005594	0.0110146	30.3556	0.185716	2	3	collagen type IX trimer	GO_CC	COL9A2,COL9A3_x000D_
GO:0005873	0.0110146	30.3556	0.185716	2	3	plus-end kinesin complex	GO_CC	BORCS5,KIF15_x000D_
GO:0033557	0.0110146	30.3556	0.185716	2	3	Slx1-Slx4 complex	GO_CC	SLX1A,SLX1B_x000D_
GO:0034678	0.0110146	30.3556	0.185716	2	3	integrin alpha8-beta1 complex	GO_CC	ITGA8,NPNT_x000D_
GO:0071821	0.0110146	30.3556	0.185716	2	3	FANCM-MHF complex	GO_CC	CENPS,CENPX_x000D_
GO:0005623	0.0120915	1.26238	1085.33	1109	17532	cell	GO_CC	A2M,ABCA2,ABCA6,ABCA8,ABCA9,ABCG1,ABRAXAS1,ABRAXAS2,ACKR3,ACTC1,ACTG2,ACVRL1,ADAMTS15,ADAMTS4,ADGRA2,ADGRA3,ADGRB2,ADGRE5,ADGRG1,ADGRG6,ADGRL1,ADGRL2,ADGRL4,ADH1B,AFDN,AFG1L,AGTR1,AK6,AK9,ALG10,ALPK1,AMPH,ANO4,ANO8,ANOS1,ANXA8L1,APCDD1,APOD,AQP3,AR,AREG,ARHGAP25,ARHGEF25,ARHGEF26,ARL10,ARL15,ARPIN,ARRDC1-AS1,ART4,ATG101,ATP23,ATP5F1A,ATP5F1B,ATP5F1C,ATP5F1D,ATP5F1E,ATP5IF1,ATP5MC1,ATP5MC2,ATP5MC3…
GO:0005743	0.0133723	1.49765	27.8072	40	450	mitochondrial inner membrane	GO_CC	ATP5F1A,ATP5F1B,ATP5F1C,ATP5F1D,ATP5F1E,ATP5MC1,ATP5MC2,ATP5MC3,ATP5MD,ATP5ME,ATP5MF,ATP5MG,ATP5MPL,ATP5PB,ATP5PD,ATP5PF,ATP5PO,COQ8A,COQ8B,COX7A1,DHFR2,DMAC1,DMAC2,DMAC2L,MAIP1,MCUB,MRPL57,MRPL58,MTHFD2L,MTLN,NDUFAF6,PAM16,PET100,PLA2G4A,RCC1L,SDHAF4,SLC25A53,SLC8B1,SQOR,TIMM29,UQCC1,UQCC2,UQCC3_x000D_
GO:0070449	0.0149934	7.59308	0.557149	3	9	elongin complex	GO_CC	ELOA,ELOB,ELOC_x000D_
GO:0032389	0.0204465	6.508	0.619055	3	10	MutLalpha complex	GO_CC	PMS2P1,PMS2P3,PMS2P6_x000D_
GO:0072588	0.0204465	6.508	0.619055	3	10	box H/ACA RNP complex	GO_CC	SNORA73A,SNORA74A,TERC_x000D_
GO:0031379	0.0211263	15.177	0.247622	2	4	RNA-directed RNA polymerase complex	GO_CC	RMRP,TENT2_x000D_
GO:0032021	0.0211263	15.177	0.247622	2	4	NELF complex	GO_CC	NELFA,NELFE_x000D_
GO:0035363	0.0211263	15.177	0.247622	2	4	histone locus body	GO_CC	ICE1,ICE2_x000D_
GO:0005739	0.0248685	1.23097	97.1916	116	1570	mitochondrion	GO_CC	ABCG1,AFG1L,ATP5F1A,ATP5F1B,ATP5F1C,ATP5F1D,ATP5F1E,ATP5IF1,ATP5MC1,ATP5MC2,ATP5MC3,ATP5MD,ATP5ME,ATP5MF,ATP5MG,ATP5MPL,ATP5PB,ATP5PD,ATP5PF,ATP5PO,AZIN2,BCLAF3,CA5BP1,CARD19,CAVIN1,CCAR2,CEBPZOS,CFAP410,COA7,COQ8A,COQ8B,COX7A1,CSKMT,DELE1,DEPP1,DGLUCY,DHFR2,DMAC1,DMAC2,DMAC2L,DNA2,E2F1,ETFBKMT,ETFRF1,FDX2,FLVCR1,FMC1,GATB,GATD3A,GATD3B,GCK,HACD3,HCLS1,HDHD5,HTD2,MAIP1,MAPK8IP1,MCUB,METAP1D,MIEF1…
GO:0016469	0.0261213	5.75761	0.673939	3	11	proton-transporting two-sector ATPase complex	GO_CC	ATP5F1A,ATP5F1B,ATP5F1C,ATP5F1D,ATP5F1E,ATP5MC1,ATP5MC2,ATP5MC3,ATP5MD,ATP5ME,ATP5MF,ATP5MG,ATP5MPL,ATP5PB,ATP5PD,ATP5PF,ATP5PO,DMAC2L_x000D_
GO:0035658	0.0337752	10.1174	0.309527	2	5	Mon1-Ccz1 complex	GO_CC	CCZ1B,RMC1_x000D_
GO:0070552	0.0337752	10.1174	0.309527	2	5	BRISC complex	GO_CC	ABRAXAS2,BABAM2_x000D_
GO:0097449	0.0341752	5.06123	0.742866	3	12	astrocyte projection	GO_CC	ADGRG1,KCNK2,SYT4_x000D_
GO:0005581	0.0422287	1.97603	5.38578	10	87	collagen trimer	GO_CC	C1QTNF7,COL10A1,COL15A1,COL21A1,COL5A3,COL9A2,COL9A3,COLEC10,COLEC11,SFTPD_x000D_
GO:0031314	0.0424316	4.55486	0.804771	3	13	extrinsic component of mitochondrial inner membrane	GO_CC	COQ8A,COQ8B,PAM16_x000D_
GO:0042645	0.0477493	2.46457	2.66194	6	43	mitochondrial nucleoid	GO_CC	ATP5F1B,DNA2,MTERF1,MTERF2,TWNK,UQCC2_x000D_
GO:0098992	0.0486088	7.58765	0.371433	2	6	neuronal dense core vesicle	GO_CC	PENK,SYT4_x000D_
GO:1990130	0.0486088	7.58765	0.371433	2	6	GATOR1 complex	GO_CC	BMT2,DEPDC5_x000D_
GO:1990742	0.0486088	7.58765	0.371433	2	6	microvesicle	GO_CC	PPFIA3,SYT4_x000D_
GO:0046933	1.05971e-11	37.672	1.02875	12	17	proton-transporting ATP synthase activity, rotational mechanism	GO_MF	ATP5F1A,ATP5F1B,ATP5F1C,ATP5F1D,ATP5F1E,ATP5MC1,ATP5MC2,ATP5MC3,ATP5MG,ATP5PB,ATP5PD,ATP5PO_x000D_
GO:0018812	8.04423e-07	Inf	0.302575	5	5	3-hydroxyacyl-CoA dehydratase activity	GO_MF	HACD1,HACD2,HACD3,HACD4,HTD2_x000D_
GO:0008195	3.622e-06	18.2253	0.786695	7	13	phosphatidate phosphatase activity	GO_MF	PLPP1,PLPP2,PLPP3,PLPP4,PLPP5,PLPPR2,PLPPR3_x000D_
GO:0000981	5.5202e-06	1.54746	99.063	142	1637	DNA-binding transcription factor activity, RNA polymerase II-specific	GO_MF	AR,BACH2,BARX1,BOLA2B,CRAMP1,E2F1,EBF4,ELK4,FOXF1,FOXF2,GATA4,GLI4,GLMP,HDX,HHEX,HOXA3,ISL2,LHX2,MBNL3,MEOX2,MKX,MYOCD,NCOA2,NKX2-3,NR1H4,NSD2,OSR2,PCBP3,POU6F1,PRDM5,PRDM6,PRRX1,RBL1,RCOR2,SCX,SMAD9,SOX11,SOX5,TBX20,TBX4,TBX5,TCF21,TET1,THAP12,TMSB15B,TOX,TSHZ2,USF3,WT1,ZBED6,ZBTB16,ZBTB37,ZBTB49,ZC3H11A,ZEB1,ZFP69,ZFPM2,ZIK1,ZKSCAN8,ZNF100,ZNF101,ZNF131,ZNF132,ZNF141,ZNF19,ZNF221,ZNF225,ZNF236,…
GO:0008757	6.51965e-06	3.03318	9.37982	25	155	S-adenosylmethionine-dependent methyltransferase activity	GO_MF	ARMT1,BMT2,BUD23,CARNMT1,CMTR1,CMTR2,CSKMT,EEF1AKMT1,EEF1AKMT2,EEF1AKMT3,EEF2KMT,ETFBKMT,INMT,KMT5A,KMT5B,KMT5C,MRM2,MRM3,NSD2,NSD3,PRDM6,PRMT9,RAMAC,TRMO,VCPKMT_x000D_
GO:0102158	1.334e-05	Inf	0.24206	4	4	very-long-chain 3-hydroxyacyl-CoA dehydratase activity	GO_MF	HACD1,HACD2,HACD3,HACD4_x000D_
GO:0102343	1.334e-05	Inf	0.24206	4	4	3-hydroxy-arachidoyl-CoA dehydratase activity	GO_MF	HACD1,HACD2,HACD3,HACD4_x000D_
GO:0102344	1.334e-05	Inf	0.24206	4	4	3-hydroxy-behenoyl-CoA dehydratase activity	GO_MF	HACD1,HACD2,HACD3,HACD4_x000D_
GO:0102345	1.334e-05	Inf	0.24206	4	4	3-hydroxy-lignoceroyl-CoA dehydratase activity	GO_MF	HACD1,HACD2,HACD3,HACD4_x000D_
GO:0042577	1.71909e-05	18.7295	0.665665	6	11	lipid phosphatase activity	GO_MF	PLPP1,PLPP2,PLPP3,PLPP6,PLPPR2,PLPPR3_x000D_
GO:0030627	5.38675e-05	7.8135	1.45236	8	24	pre-mRNA 5'-splice site binding	GO_MF	RNU1-1,RNU1-2,RNU1-4,RNVU1-15,RNVU1-18,RNVU1-19,RNVU1-6,RNVU1-7_x000D_
GO:0016279	5.86687e-05	4.24417	3.69141	13	61	protein-lysine N-methyltransferase activity	GO_MF	CSKMT,EEF1AKMT1,EEF1AKMT2,EEF1AKMT3,EEF2KMT,ETFBKMT,KMT5A,KMT5B,KMT5C,NSD2,NSD3,PRDM6,VCPKMT_x000D_
GO:0042799	6.34821e-05	62.3293	0.302575	4	5	histone methyltransferase activity (H4-K20 specific)	GO_MF	KMT5A,KMT5B,KMT5C,NSD2_x000D_
GO:0016741	0.000122789	2.29768	13.7974	29	228	transferase activity, transferring one-carbon groups	GO_MF	ARMT1,BMT2,BUD23,CARNMT1,CMTR1,CMTR2,CSKMT,EEF1AKMT1,EEF1AKMT2,EEF1AKMT3,EEF1AKNMT,EEF2KMT,ETFBKMT,INMT,KMT5A,KMT5B,KMT5C,MRM2,MRM3,NSD2,NSD3,PRDM11,PRDM5,PRDM6,PRMT9,RAMAC,SPOUT1,TRMO,VCPKMT_x000D_
GO:0016807	0.000221024	Inf	0.181545	3	3	cysteine-type carboxypeptidase activity	GO_MF	MINDY1,MINDY2,MINDY3_x000D_
GO:0019797	0.000221024	Inf	0.181545	3	3	procollagen-proline 3-dioxygenase activity	GO_MF	P3H1,P3H2,P3H3_x000D_
GO:0008170	0.0002219	3.0981	5.86995	16	97	N-methyltransferase activity	GO_MF	CSKMT,EEF1AKMT1,EEF1AKMT2,EEF1AKMT3,EEF2KMT,ETFBKMT,KMT5A,KMT5B,KMT5C,NSD2,NSD3,PRDM6,PRMT9,RAMAC,TRMO,VCPKMT_x000D_
GO:0140110	0.00056017	1.35352	125.266	160	2070	transcription regulator activity	GO_MF	AR,BACH2,BARX1,BOLA2B,CAPN15,CCAR2,CRAMP1,E2F1,EBF4,ELK4,FOXF1,FOXF2,GATA4,GLI4,GLMP,GTF2A1,HDX,HHEX,HOXA3,ISL2,JADE1,KMT5A,L3MBTL1,LHX2,MBNL3,MED18,MEOX2,MKX,MRTFA,MRTFB,MYCBP,MYOCD,NCOA2,NKX2-3,NOCT,NR1H4,NSD2,NSD3,OSR2,PCBP3,POU6F1,PRDM5,PRDM6,PRRX1,RBL1,RCOR2,RRN3P1,RUNX1T1,SCX,SGF29,SMAD9,SOX11,SOX5,SRSF2,TBX20,TBX4,TBX5,TCF19,TCF21,TET1,THAP12,TMSB15B,TOX,TSHZ2,USF3,WT1,ZBED6,ZBTB16,ZBTB37,…
GO:0046872	0.000614219	1.2645	251.379	296	4154	metal ion binding	GO_MF	ACVRL1,ADAMTS10,ADAMTS15,ADAMTS4,ADAMTS8,ADGRE5,ADGRL4,ADH1B,AMY2B,ANKMY1,ANXA8L1,AR,ASPN,ATP23,ATP8B4,B4GAT1,BEX3,BRIP1,C2,CA5BP1,CACNA1H,CACNA2D1,CAPN15,CBSL,CD4,CDK15,CDKAL1,CEMIP2,CGAS,CGREF1,CIAO2A,CIAO3,CLEC3B,COL10A1,COLEC11,COP1,CPZ,CRACR2A,CSGALNACT1,CYP39A1,DGKE,DGKH,DMAC2L,DNA2,DRP2,DXO,EBF4,ESCO2,EXO1,EYA4,F10,FAAP20,FDX2,GALNT15,GATA4,GCH1,GLI4,GTF2H2C,GUCY1B1,HEPH,HERC2P3,HPF1,IRAK3…
GO:0042625	0.000616575	3.41439	4.0545	12	67	ATPase coupled ion transmembrane transporter activity	GO_MF	ATP5F1A,ATP5F1B,ATP5F1C,ATP5F1D,ATP5F1E,ATP5MC1,ATP5MC2,ATP5MC3,ATP5MG,ATP5PB,ATP5PD,ATP5PO_x000D_
GO:0017108	0.000766716	15.5795	0.48412	4	8	5'-flap endonuclease activity	GO_MF	DNA2,EXO1,SLX1A,SLX1B_x000D_
GO:0043532	0.000844078	46.703	0.24206	3	4	angiostatin binding	GO_MF	ATP5F1A,ATP5F1B,ATP5IF1_x000D_
GO:0043492	0.00100527	2.47619	7.98798	18	132	ATPase activity, coupled to movement of substances	GO_MF	ABCA2,ABCA6,ABCA8,ABCA9,ABCG1,ATP5F1A,ATP5F1B,ATP5F1C,ATP5F1D,ATP5F1E,ATP5MC1,ATP5MC2,ATP5MC3,ATP5MG,ATP5PB,ATP5PD,ATP5PO,ATP8B4_x000D_
GO:0015405	0.00129141	2.49031	7.50386	17	124	P-P-bond-hydrolysis-driven transmembrane transporter activity	GO_MF	ABCA2,ABCA6,ABCA8,ABCA9,ABCG1,ATP5F1A,ATP5F1B,ATP5F1C,ATP5F1D,ATP5F1E,ATP5MC1,ATP5MC2,ATP5MC3,ATP5MG,ATP5PB,ATP5PD,ATP5PO_x000D_
GO:0042392	0.00201497	23.3501	0.302575	3	5	sphingosine-1-phosphate phosphatase activity	GO_MF	PLPP1,PLPP2,PLPP3_x000D_
GO:0071558	0.00201497	23.3501	0.302575	3	5	histone demethylase activity (H3-K27 specific)	GO_MF	KDM6B,KDM7A,PHF8_x000D_
GO:0016887	0.00287456	1.64329	26.9292	42	445	ATPase activity	GO_MF	ABCA2,ABCA6,ABCA8,ABCA9,ABCG1,ACTC1,AFG1L,AK6,ATP5F1A,ATP5F1B,ATP5F1C,ATP5F1D,ATP5F1E,ATP5MC1,ATP5MC2,ATP5MC3,ATP5ME,ATP5MF,ATP5MG,ATP5PB,ATP5PD,ATP5PF,ATP5PO,ATP8B4,BRIP1,DNA2,DNHD1,FBH1,HELB,KIF15,KIF27,KIF4A,MOV10L1,MRE11,MTREX,PMS2P1,PMS2P3,PMS2P6,PTPA,RAD51B,SLFN11,TNNT2_x000D_
GO:0003677	0.00373226	1.26284	152.256	183	2516	DNA binding	GO_MF	AR,BACH2,BARX1,BRCA2,BRIP1,CBX2,CENPC,CENPS,CENPX,CGAS,CLSPN,COLEC11,CRAMP1,DNA2,E2F1,EBF4,ELK4,EXO1,FAAP100,FAAP24,FBH1,FOXF1,FOXF2,GATA4,GLI4,GLMP,GTF2A1,HDX,HHEX,HMCES,HOXA3,ISL2,KDM6B,KIF15,KIF4A,LHX2,LIN9,LMNB1,MEOX2,MKX,MRE11,MTERF1,MTERF2,MTERF3,MTERF4,MYOCD,NCOA2,NEIL1,NKX2-3,NR1H4,NSD2,OSR2,PCBP3,POU6F1,PRDM11,PRDM5,PRDM6,PRRX1,PUM3,RAD51B,RBL1,RCOR2,RUNX1T1,SCX,SERPINA3,SMAD9,SOX11,SOX5…
GO:0036435	0.00643317	11.6736	0.423605	3	7	K48-linked polyubiquitin modification-dependent protein binding	GO_MF	MINDY1,MINDY2,UFD1_x000D_
GO:0043167	0.0080111	1.17278	373.922	411	6179	ion binding	GO_MF	ABCA2,ABCA6,ABCA8,ABCA9,ABCG1,ACTC1,ACTG2,ACVRL1,ADAMTS10,ADAMTS15,ADAMTS4,ADAMTS8,ADGRE5,ADGRG1,ADGRL4,ADH1B,AFG1L,AK6,AK9,ALPK1,AMPH,AMY2B,ANKMY1,ANOS1,ANXA8L1,AR,ARL10,ARL15,ARRDC1-AS1,ASPN,ATP23,ATP5F1A,ATP5F1B,ATP5F1D,ATP8B4,B4GAT1,BCHE,BEX3,BRIP1,C2,CA5BP1,CACNA1H,CACNA2D1,CAMK4,CAPN15,CASTOR1,CAVIN2,CBSL,CBWD2,CBWD6,CD4,CDK15,CDKAL1,CDKL5,CEMIP,CEMIP2,CGAS,CGREF1,CIAO2A,CIAO3,CLEC3B,CNNM2,…
GO:0004652	0.00978978	9.35424	0.483349	3	8	polynucleotide adenylyltransferase activity	GO_MF	TENT2,TENT4A,TENT4B,TENT5A,TENT5B_x000D_
GO:0004383	0.00983304	9.33835	0.48412	3	8	guanylate cyclase activity	GO_MF	GUCY1A1,GUCY1B1,NPR1_x000D_
GO:0004415	0.00983304	9.33835	0.48412	3	8	hyalurononglucosaminidase activity	GO_MF	CEMIP,CEMIP2,OGA_x000D_
GO:0008430	0.00983304	9.33835	0.48412	3	8	selenium binding	GO_MF	DIO2,SELENOP,SELENOT_x000D_
GO:0043139	0.00983304	9.33835	0.48412	3	8	5'-3' DNA helicase activity	GO_MF	DNA2,HELB,TWNK_x000D_
GO:0004117	0.0105345	31.1061	0.181545	2	3	calmodulin-dependent cyclic-nucleotide phosphodiesterase activity	GO_MF	PDE1A,PDE1C_x000D_
GO:0035663	0.0105345	31.1061	0.181545	2	3	Toll-like receptor 2 binding	GO_MF	TLR1,TLR6_x000D_
GO:0048101	0.0105345	31.1061	0.181545	2	3	calcium- and calmodulin-regulated 3',5'-cyclic-GMP phosphodiesterase activity	GO_MF	PDE1A,PDE1C_x000D_
GO:0050265	0.0105345	31.1061	0.181545	2	3	RNA uridylyltransferase activity	GO_MF	TUT4,TUT7_x000D_
GO:0016835	0.0133554	2.43924	4.47811	10	74	carbon-oxygen lyase activity	GO_MF	CA5BP1,CBSL,DGLUCY,HACD1,HACD2,HACD3,HACD4,HTD2,NAXD,NEIL1_x000D_
GO:0008375	0.0137207	2.77327	3.20729	8	53	acetylglucosaminyltransferase activity	GO_MF	B3GLCT,B3GNT10,B4GAT1,GCNT4,LARGE1,MGAT5,POMGNT2,XYLT1_x000D_
GO:0035252	0.0140925	7.78148	0.544635	3	9	UDP-xylosyltransferase activity	GO_MF	LARGE1,RXYLT1,XYLT1_x000D_
GO:0051864	0.0140925	7.78148	0.544635	3	9	histone demethylase activity (H3-K36 specific)	GO_MF	KDM7A,PHF8,RIOX1_x000D_
GO:0008409	0.0168372	4.79108	1.02875	4	17	5'-3' exonuclease activity	GO_MF	DXO,EXO1,MRE11,TRIR_x000D_
GO:0071723	0.0192384	6.66944	0.60515	3	10	lipopeptide binding	GO_MF	CD14,TLR1,TLR6_x000D_
GO:0016212	0.0202248	15.5521	0.24206	2	4	kynurenine-oxoglutarate transaminase activity	GO_MF	KYAT1,KYAT3_x000D_
GO:0034597	0.0202248	15.5521	0.24206	2	4	phosphatidylinositol-4,5-bisphosphate 4-phosphatase activity	GO_MF	PIP4P1,PIP4P2_x000D_
GO:0047696	0.0202248	15.5521	0.24206	2	4	beta-adrenergic receptor kinase activity	GO_MF	GRK2,GRK3_x000D_
GO:0030020	0.0224816	3.01614	2.23905	6	37	extracellular matrix structural constituent conferring tensile strength	GO_MF	COL10A1,COL15A1,COL21A1,COL5A3,COL9A2,COL9A3_x000D_
GO:0140030	0.0250622	1.84553	8.59313	15	142	modification-dependent protein binding	GO_MF	ABRAXAS1,ABRAXAS2,BABAM2,CBX2,FAAP20,KDM7A,L3MBTL1,MINDY1,MINDY2,PHF8,PYGO1,RNF168,SGF29,SPIN2B,UFD1_x000D_
GO:0004112	0.0283969	3.24486	1.75493	5	29	cyclic-nucleotide phosphodiesterase activity	GO_MF	PDE1A,PDE1C,PDE3A,PDE4B,PRKAR2B_x000D_
GO:1902282	0.0322233	5.18672	0.72618	3	12	voltage-gated potassium channel activity involved in ventricular cardiac muscle cell action potential repolarization	GO_MF	KCNE3,KCNE4,KCNH2_x000D_
GO:0004499	0.0323648	10.3674	0.302575	2	5	N,N-dimethylaniline monooxygenase activity	GO_MF	FMO2,FMO3_x000D_
GO:0004563	0.0323648	10.3674	0.302575	2	5	beta-N-acetylhexosaminidase activity	GO_MF	HEXD,OGA_x000D_
GO:0008486	0.0323648	10.3674	0.302575	2	5	diphosphoinositol-polyphosphate diphosphatase activity	GO_MF	NUDT4,NUDT4B_x000D_
GO:0016435	0.0323648	10.3674	0.302575	2	5	rRNA (guanine) methyltransferase activity	GO_MF	BUD23,MRM3_x000D_
GO:0019238	0.0323648	10.3674	0.302575	2	5	cyclohydrolase activity	GO_MF	GCH1,MTHFD2L_x000D_
GO:0042030	0.0323648	10.3674	0.302575	2	5	ATPase inhibitor activity	GO_MF	ATP5IF1,PLN_x000D_
GO:0052840	0.0323648	10.3674	0.302575	2	5	inositol diphosphate tetrakisphosphate diphosphatase activity	GO_MF	NUDT4,NUDT4B_x000D_
GO:0052843	0.0323648	10.3674	0.302575	2	5	inositol-1-diphosphate-2,3,4,5,6-pentakisphosphate diphosphatase activity	GO_MF	NUDT4,NUDT4B_x000D_
GO:0052844	0.0323648	10.3674	0.302575	2	5	inositol-3-diphosphate-1,2,4,5,6-pentakisphosphate diphosphatase activity	GO_MF	NUDT4,NUDT4B_x000D_
GO:0052845	0.0323648	10.3674	0.302575	2	5	inositol-5-diphosphate-1,2,3,4,6-pentakisphosphate diphosphatase activity	GO_MF	NUDT4,NUDT4B_x000D_
GO:0052846	0.0323648	10.3674	0.302575	2	5	inositol-1,5-bisdiphosphate-2,3,4,6-tetrakisphosphate 1-diphosphatase activity	GO_MF	NUDT4,NUDT4B_x000D_
GO:0052847	0.0323648	10.3674	0.302575	2	5	inositol-1,5-bisdiphosphate-2,3,4,6-tetrakisphosphate 5-diphosphatase activity	GO_MF	NUDT4,NUDT4B_x000D_
GO:0052848	0.0323648	10.3674	0.302575	2	5	inositol-3,5-bisdiphosphate-2,3,4,6-tetrakisphosphate 5-diphosphatase activity	GO_MF	NUDT4,NUDT4B_x000D_
GO:1990817	0.0323648	10.3674	0.302575	2	5	RNA adenylyltransferase activity	GO_MF	TENT5A,TENT5B_x000D_
GO:0140102	0.0349707	3.66289	1.27081	4	21	catalytic activity, acting on a rRNA	GO_MF	BMT2,BUD23,MRM2,MRM3_x000D_
GO:0008173	0.0354486	2.26766	3.81244	8	63	RNA methyltransferase activity	GO_MF	BMT2,BUD23,CMTR1,CMTR2,MRM2,MRM3,RAMAC,TRMO_x000D_
GO:0004714	0.0384515	2.22703	3.87296	8	64	transmembrane receptor protein tyrosine kinase activity	GO_MF	EPHA3,EPHB6,ERBB3,FGFR2,INSR,LMTK2,PDGFRL,ROR2_x000D_
GO:0015026	0.0393766	2.59645	2.54163	6	42	coreceptor activity	GO_MF	ACKR3,CD4,NECTIN1,NECTIN2,RAMP2,ROR2_x000D_
GO:0070679	0.0400494	4.66776	0.786695	3	13	inositol 1,4,5 trisphosphate binding	GO_MF	PLCL1,TRPC4,TRPC6_x000D_
GO:1990380	0.0400494	4.66776	0.786695	3	13	Lys48-specific deubiquitinase activity	GO_MF	MINDY1,MINDY2,MINDY3_x000D_
GO:0001665	0.0466228	7.77512	0.36309	2	6	alpha-N-acetylgalactosaminide alpha-2,6-sialyltransferase activity	GO_MF	ST6GALNAC3,ST6GALNAC5_x000D_
GO:0019958	0.0466228	7.77512	0.36309	2	6	C-X-C chemokine binding	GO_MF	A2M,ACKR3_x000D_
GO:0034511	0.0466228	7.77512	0.36309	2	6	U3 snoRNA binding	GO_MF	SNU13,UTP25_x000D_
GO:0042289	0.0466228	7.77512	0.36309	2	6	MHC class II protein binding	GO_MF	CD4,KRT17_x000D_
GO:0050733	0.0466228	7.77512	0.36309	2	6	RS domain binding	GO_MF	SRSF10,U2AF1L5_x000D_
GO:1990050	0.0466228	7.77512	0.36309	2	6	phosphatidic acid transporter activity	GO_MF	PRELID3A,PRELID3B_x000D_
GO:0005246	0.0479096	2.4595	2.66266	6	44	calcium channel regulator activity	GO_MF	INAFM1,INAFM2,MCUB,PLN,PRKG1,STIMATE_x000D_
GO:0032947	0.0480717	1.92532	5.50686	10	91	protein-containing complex scaffold activity	GO_MF	ECPAS,KSR1,MAPK8IP1,PAXX,PDE4DIP,PKP2,RACK1,SLC9A3R2,TMEM250,WWC2_x000D_
GO:0005518	0.0484645	2.11341	4.0545	8	67	collagen binding	GO_MF	ADGRG1,ADGRG6,ASPN,COL5A3,CTSL,ECM2,P3H1,VTN_x000D_
